# Supplementary material
Source: PubMed Central journal article supplement (PMC8513669)
Supplement: bloodBLD2020008101-suppl1.pdf [file bloodBLD2020008101-suppl1.pdf]

## **Supplemental Materials**

### **Seda et al. FoxO1-GAB1 Axis Regulates Homing Capacity and Tonic AKT Activity in Chronic Lymphocytic Leukemia**

Correspondence:

Marek Mraz, M.D., Ph.D.  
Associate Professor of Oncology  
Central European Institute of Technology, Masaryk University  
Kamenice 5, 625 00 Brno, Czech Republic  
E-mail: marek.mraz@email.cz  
Tel.: +420 549498143

#### **1) Supplemental Methods**

#### **2) Supplemental Figures: 29**

#### **3) Supplemental Tables: 8**

#### **1) Supplemental Methods**

##### **CLL samples**

Primary CLL samples were collected with written informed consent, and the Institutional Review Board approved the study. Peripheral blood samples were obtained from patients who did not receive any therapy for at least six months (except the ibrutinib/idelalisib treated patients). The samples from ibrutinib/idelalisib-treated patients were collected at a day before the drug administration and during therapy at the time points indicated in the figure legend. All primary CLL samples were purified by negative selection with RosetteSep Human B Cell Enrichment Cocktail (Stemcell Technologies) and RosetteSep Human CD3 Depletion Cocktail (Stemcell Technologies) and Ficoll-Paque PLUS (Sigma Aldrich) according to manufacturer's protocol and the final purity was >95% of CD5+19+ cells. In some cases PBMCs (Fig. 5E, samples CLL\_113-118) were isolated and subsequently purified by magnetic separation using anti-CD3 MicroBeads (Miltenyi Biotec). Final purity was ≥95% of CD5+19+ cells in all cases (evaluated by flow cytometry). Purified primary CLL cells were cultivated in RPMI-1640

(Sigma-Aldrich) supplemented with 10% fetal bovine serum (Biosera) and 100 U·ml<sup>-1</sup> / 100 µg·ml<sup>-1</sup> of penicillin/streptomycin (Sigma Aldrich) and in 5% CO<sub>2</sub> at 37°C.

### **Cell culture**

MEC1 cell line was obtained from the German Collection of Microorganisms and was cultivated in Iscove's Modified Dulbecco's Medium (IMDM, Biosera) supplemented with 10% fetal bovine serum (Biosera) and 100 U·ml<sup>-1</sup> / 100 µg·ml<sup>-1</sup> penicillin/streptomycin (Sigma Aldrich) and further cultivated in 5% CO<sub>2</sub> at 37°C. OSU-CLL cell line was a kind gift from Dr. Byrd (The Ohio State University) and was cultivated in RPMI-1640 media (Biosera) supplemented with 10% fetal bovine serum (Biosera) and 100 U·ml<sup>-1</sup> / 100 µg·ml<sup>-1</sup> penicillin/streptomycin (Sigma Aldrich) and further cultivated in 5% CO<sub>2</sub> at 37°C. HS5 cell line as well as HEK293-FT cell line were obtained from the German Collection of Microorganisms and both were cultivated in Dulbecco's Modified Eagle's Medium (DMEM, Biosera) supplemented with 10% fetal bovine serum (Biosera) and 100 U·ml<sup>-1</sup> / 100 µg·ml<sup>-1</sup> penicillin/streptomycin (Sigma Aldrich) and further cultivated in 5% CO<sub>2</sub> at 37°C.

### **Gene expression analysis**

Total RNA was isolated by TRIzol (Molecular Research Center) as described previously.<sup>1</sup> Protein-coding gene expression analyses was performed using TaqMan Gene Expression Assays (Thermo Fisher Scientific) and normalized to an endogenous control (*GAPDH*, *HPRT*), as described previously.<sup>2</sup> Probes used in this study: *GAB1* (Hs00157646\_m1), *FoxO1* (Hs00231106\_m1), *NCK2* (Hs02561903\_s1), *MYLK* (Hs00364926\_m1), *GPR183* (Hs00270639\_s1), *FLNA* (Hs00924645\_m1), *SERPINF1* (Hs01106937\_m1), *SEMA4F* (Hs01586592\_m1), *HPRT1* (Hs02800695\_m1), *GAPDH* (4333764F), mouse *CXCL12* (Mm00445553\_m1), mouse *CXCL13* (Mm00444534\_m1), mouse *HPRT* (Mm03024075\_m1).

### **mRNA-seq and data analysis**

The sequencing of poly(A) transcriptome of CXCR4<sup>dim</sup>CD5<sup>bright</sup> and CXCR4<sup>bright</sup>CD5<sup>dim</sup> CLL intracлонаl subpopulations was performed as described previously.<sup>3</sup> Briefly, libraries were prepared using TruSeq Stranded mRNA LT Sample Prep Kit (Illumina) according to the manufacturer instructions. The final libraries were diluted to the desired concentration of 2 pM and were used to prepare a paired-end flow cell using a cBot System (Illumina) and then sequenced with Illumina NextSeq 500/550 High Output v2.5 kit (Illumina) generating 75-bp paired-end sequences.

The quality of the sequencing data was checked using the FastQC<sup>4</sup> (v0.11.3) and Kraken package<sup>5</sup> (v13-274). The presence of adapters was scanned using Minion and Swan (Kraken package,<sup>5</sup> v13-274). Pre-processing of the raw reads was done using Trimmomatic<sup>6</sup>

(v0.36) in the following steps (i) *N* and very low-quality bases (Phred < 3) from both 5' and 3' ends were removed, (ii) Poly(A) and poly(T) tails were removed, (iii) Sequencing adapters were removed, (iv) Reads were trimmed to a maximal length of 75 bp, (v) Low quality ends with average Phred score < 5 of 4 consecutive bases were trimmed using the sliding window approach, (vi) Reads shorter than 15 bp and without a proper pairing after the pre-processing were removed. The pre-processed reads were then mapped to the *Homo sapiens* reference genome (Ensembl<sup>7</sup> release 84, primary assembly) together with corresponding Ensembl genome annotation (Ensembl release 84) using STAR<sup>8</sup> (v2.5.2a) in 2-pass mapping approach. Exon-mapped reads were summarized to genes using STAR (a similar approach to the HTSeq-count<sup>9</sup> 'union') . Only uniquely mapped reads were used. Strandedness of the sequencing protocol was taken into account and 'reverse' counts were used. Differential gene expression was analyzed using DESeq2<sup>10</sup> (v1.13.8) Bioconductor<sup>11</sup> package for genes with a base mean count >200 per million. P-values were adjusted for multiple testing using the Benjamini-Hochberg method. The fold change was calculated as CXCR4<sup>dim</sup>CD5<sup>bright</sup>/CXCR4<sup>bright</sup>CD5<sup>dim</sup> cells. The heatmap visualization was created using the Heatmapper tool.<sup>11</sup>

### **siRNA transfection**

MEC1 cells or freshly isolated primary CLL cells (5x10<sup>6</sup>) were electroporated (Neon Transfection System, Thermo Fisher Scientific (program for MEC1 cells: 1500 V / 20 ms / 2 pulses; program for primary CLL cells: 1900V / 30ms / 1 puls) with a short interfering RNA (siRNA) against *GAB1*, or against *FoxO1* (both On-Target Plus Smartpool siRNAs, 1000 nM, Dharmacon), or by On-Target Plus Smartpool Negative Control (1000 nM, Dharmacon). The cells were harvested 48 hrs after transfection for further analyses.

### **Flow cytometry and cell sorting**

The primary CLL cells or cell lines were labeled with one or combination of these antibodies: CD5 (FITC, UCHT2; Sony), CD184 [CXCR4] (PE, 12G5; Sony), CD19 (PECy7, JC-119, Beckman Coulter), CD45 (BV510, HI30; SONY), CD105 (A647, 43A3; SONY) and labeled with SYTOX-BLUE (Invitrogen) for viability. For intracellular staining, the cells were further fixed using 4% paraformaldehyde (PFA) and 50% methanol and stained with primary rabbit antibodies against *GAB1* (#3232, 1:100; Cell Signaling) or *FoxO1* (#2880, 1:100; Cell Signaling) and secondary anti-rabbit antibody conjugated with Alexa-647 (#4414, 1:500; Cell Signaling). Data were collected from at least 20,000 events using BD FACSVerser and analyzed using FlowJo software (version 10). Normalised expression of intracellular proteins was calculated as MFI of the protein of interest relative to MFI for secondary antibody only.

Cell viability was investigated by DiOC6 (3,3'-dihexyloxacarbocyanine iodide) together with PI (propidium iodide) staining (Thermo Fisher Scientific). All measurements were performed on FACS Verse (BD Biosciences-US) and cell sorting on BD FACSAria Fusion (BD Biosciences-US).

### **Calcium flux assay**

The primary CLL cells ( $1 \times 10^6$ /ml) were incubated in Hanks Balanced Salt Solution (HBSS) containing 2 mM Fluo-4AM (Molecular Probes) for 30 min at 37°C. We established a baseline fluorescence threshold for each sample (by acquiring samples for 60 seconds without any stimulus). We then calculated the peak Fluo-4AM signal and fluorescence intensity above baseline Fluo-4AM signal following stimulation.

### **HS5 coculture and conditioned media**

HS5 cells were seeded at  $2 \times 10^6$  in 75 cm<sup>2</sup> culture flasks in DMEM with 10% FBS. The next day, DMEM medium was replaced by IMDM or RPMI media containing 10% FBS and  $2.5 \times 10^6$ /ml of MEC1 cells (in IMDM) or  $5 \times 10^6$ /ml primary CLL cells (in RPMI). The HS5 coculture was allowed for the specified time and then harvested and stained with Sytox blue and CD105 antibody. The purity of B cells after sorting was validated by anti-CD19 antibody. The conditioned media was harvested after cultivating confluent HS5 cells in DMEM with 10% FBS for 48 hrs.

To prepare conditioned media,  $3.5 \times 10^6$  of HS5 cells was seeded in T75 cultivation flask (TPP) in 12 ml of DMEM media. The next day, original media was discarded, and the cells attached to the bottom of the flask were washed once with 10 ml of PBS. Subsequently, 25 ml of RPMI media was added to the attached HS5 cells. The conditioned media was collected after 48 hrs, separated from cell-debris by 10 minutes centrifugation at 2000 RCF and diluted with fresh RPMI media containing 10% FBS and  $100 \text{ U} \cdot \text{ml}^{-1}$  /  $100 \text{ } \mu\text{g} \cdot \text{ml}^{-1}$  penicillin/streptomycin to the final concentration of 50% conditioned media. This media was immediately used for experiments.

### **Primary human mesenchymal stromal cells and conditioned media**

Human bone marrow was obtained from a healthy male donor with a written consent. Cells were resuspended in osmolysis buffer and spun (300g for 10 min). This step was repeated till all erythrocytes were removed. Cells were subsequently washed with PBS and plated in alphaMEM media (Sigma-Aldrich) containing 10% FBS and  $100 \text{ U} \cdot \text{ml}^{-1}$  /  $100 \text{ } \mu\text{g} \cdot \text{ml}^{-1}$  of penicillin/streptomycin (Sigma-Aldrich). Cells were cultured at 37°C for 48 hrs and subsequently washed (3x) with PBS in order to remove non-adherent cells. Adherent cells were resupplemented in fresh media, and incubated for another 48 hrs. For all experiments

only cells within 2nd-6th passage were used. To prepare conditioned media,  $4 \times 10^6$  of the primary human bone marrow mesenchymal stromal cells were seeded in T75 cultivation flask (TPP) in 12 ml of full alpha-MEM media. The next day, original media was discarded, and the cells attached to the bottom of the flask were washed once with 10 ml of PBS and supplemented with fresh 12 ml of alpha-MEM media. The conditioned media was collected after 72 hrs, separated from cell-debris by 10 min centrifugation at 2000 RCF and immediately used for experiment or directly frozen at  $-80^{\circ}\text{C}$ .

### **Chemokine concentration measurements by ELISA**

The levels of chemokines SDF1 (CXCL12) and CXCL13 (BLC/BCA-1) were measured in conditioned media produced by HS5 or by primary human bone marrow mesenchymal stromal cells (for conditioned media preparation see above), or in serum from CLL peripheral blood or paired serum sample from sternal puncture in CLL patients. All measurements were performed according to manufacturer's protocol (Quantikine, R&D Systems, Minneapolis, MN). The absorbance at 450 and 570 nm was measured by TECAN SPARK.

### ***In vitro* migration assay and F-actin polymerization**

The competitive migration assay was performed by staining of MEC1 cells or primary CLL cells with CFSE or FarRed CellTrace dye according to manufacturer protocol and incubated overnight. The next day, the stained control cells and GAB1-KO cells were analyzed for viability (stained with Sytox Blue; Thermo Fisher Scientific). The paired samples with low viability (<80%) were excluded from further experiments as well as samples where the difference in viability between paired samples was higher than 5%. To compare the migration, the stained cells were mixed in ratio 1:1 and loaded to transwell inserts with 5  $\mu\text{m}$  pores (Falcon) according to manufacturer protocol. The migration towards SDF1 (100 ng/ml for CLL cells or 250 ng/ml for MEC1 cells), CXCL13 (250 ng/ml for CLL cells or 500 ng/ml for MEC1 cells), 100% conditioned media produced by primary human bone marrow mesenchymal stromal cells, or 50% conditioned media produced by HS5 cells was allowed for the indicated time and subsequently analyzed by flow cytometry. The F-actin polymerization was performed by staining with Phalloidin-iFluor488 (Abcam) and visualized by EVOS Cell Imaging Systems (Thermo Fisher Scientific).

### **Plasmid transfections, CRISPR/Cas9, transduction of shRNAs**

The GAB1<sup>MYC</sup> plasmid was kindly provided by Armelle Yart<sup>12</sup> and empty control plasmid was a gift from Adam Antebi (Addgene plasmid #52535). pSpCas9(BB)-2A-GFP (PX458) was a gift from Feng Zhang (Addgene plasmid #48138;).

The gRNA sequences targeting the second exon of the *GAB1* gene or first exon of *FoxO1* gene were designed in Benchling (Biology Software, 2019) online tool. The sequence 5'-CTACTTGGTAGCAGACAGCG-3' for GAB1-gRNA or 5'-ATCCACATCGAGGCTCCTCG-3' for FoxO1-gRNA was cloned into pSpCas9(BB)-2A-GFP vector (#48138, Addgene). To obtain the mutant variant, the MEC1 wild-type cells (MEC1<sup>WT</sup>) cells were electroporated as described above for siRNAs. After 48 hrs viable cells were sorted according to GFP-positivity, expanded, and validated for absence of GAB1 or FoxO1 .

To perform inducible shRNA expression, the sequence 5'-CCGGAGTTAACACACTCGTAGTATTCTCGAGAATACTACGAGTGTGTTAACTTTTTTG-3' was purchased from Sigma Aldrich and subsequently cloned into the empty plasmid Tet-pLKO-puro for shRNA expression.<sup>13</sup> This plasmid was purchased from Addgene (Addgene plasmid #21915) as well as the envelope plasmid pCMV-VSV-G (Addgene plasmid #8454). The packaging plasmid dR8.91 was kindly provided by M. Smida (Masaryk University). Virus particles were produced in HEK-293-FT (obtained from ATCC) after plasmids transfection by Dharmacon (Horizon) and added to desired B cell lines. The transduced cells were subsequently selected by puromycin (3 µg/ml, Sigma Aldrich) for 5 days. The expression of shRNA in B cell lines was induced by adding tetracycline (1 µg/ml; Sigma Aldrich) into media (tet+) for 48 hrs, and control cells were treated with vehicle (tet-).

For *in vivo* growth assay MEC1<sup>WT</sup> and MEC1<sup>GAB1-KO</sup> cell lines were transduced by GFP or Azurit encoding vectors (both obtained from Addgene; #36083 and #36086, respectively) as described above. Cells were subsequently sorted for GFP or Azurit positive cells.

### **Immunoblotting**

Cells were lysed in lysis buffer (1% SDS, 50 mM TRIS-HC pH 6.8, 10% glycerol) with phosphatase and protease inhibitors (Sigma Aldrich) and protein concentration was determined using DC Protein Assay (BioRad). Equal amounts of protein were separated by SDS-PAGE and transferred to the PVDF membrane (0.45 µm pore size, Millipore). The membranes were incubated with the Cell Signaling antibodies specific for the following immobilized proteins: GAB1 (#3232, 1:2000), pGAB1<sup>Y307</sup> (#3234, 1:2000), FoxO1 (#2880, 1:1000), pFoxO1 (#9461, 1:2000), AKT (#2920, 1:3000), pAKT (#4060, 1:3000), BCL<sub>XL</sub> (#2764, 1:2000), SYK (#12358, 1:2000), PLC $\gamma$  (#3872, 1:2000), CD79 $\alpha$  (#3351, 1:2000), ERK (#4696, 1:3000) pERK (#4377, 1:3000), B-actin (#4970, 1:5000), GAPDH (#2118, 1:4000), or with antibodies obtained from Abcam - pGAB1<sup>Y627</sup> (ab131458, 1:2000), anti-CD20 antibody (Ab78237, 1:2000). Secondary horse-radish peroxidase (HRP)-conjugated anti-mouse or anti-rabbit antibodies (both Cell Signaling) were used to detect primary antibodies. Immunocomplexes were detected using ECL (BioRad), and the chemiluminescent signal was digitally detected with UVItec Alliance 4.7 (UVItec).

## ChIP

Chromatin immunoprecipitation was performed as previously described by Carey *et al.*<sup>14</sup> Briefly, 20x10<sup>6</sup> MEC1 cells were fixed in 1% paraformaldehyde. The fixation was quenched by glycine after 10 min. After washing with cold PBS, the fixed cells were lysed in 10ml of ChIP-lysis buffer (5 mM PIPES pH 8.0, 85 mM KCl, 0.5% NP-40) and incubated on ice for another 10 min. The cell nuclei were pelleted by centrifugation and subsequently lysed in 1ml of nuclei-lysis buffer (50 mM TRIS-Cl pH 8.0, 10 mM EDTA, 1% SDS) containing protease inhibitors. Sonication was performed by the Covaris S220 sonicator in original glass tubes. The instrument was set according to manufacturer protocol (PIP:140, DF: 5, CBP: 200, treatment time: 20 min, temperature min/max: 3/9°C). The cell debris was subsequently discarded by centrifugation and DNA concentration was measured by Nanodrop 2000 (Thermo Fisher Scientific). One-hundred µg of chromatin was aliquoted per antibody and diluted with dilution buffer (16.7 mM TRIS-Cl pH 8.0, 167 mM NaCl, 1.2 mM EDTA, 0.01% SDS, 1.1% TRITON X-100, containing protease inhibitors) to a final volume of 300 µl. Chromatin was precleared with 50 µl of protein A/G ChIP-grade magnetic beads (Thermo Fisher Scientific). The magnetic beads were discarded after 2 hrs of incubation, and 10 µl of anti-FoxO1A antibody (ab39670; ChIP Grade, Abcam) or 10 µl of control rabbit IgG (#2729; Cell Signaling) was added to chromatin. The samples were rotated and incubated at 4°C overnight. The next day, the immunocomplexes were pulled down by 50 µl of A/G ChIP-grade magnetic beads (Thermo Fisher Scientific) blocked by salmon sperm and BSA. The beads were washed three times in 1ml of High-salt wash buffer (50 mM HEPES pH 7.9, 500 mM NaCl, 1 mM EDTA, 0.1% SDS, 1% TRITON X-100, 0.1% deoxycholate). The elution was performed in 300 µl of Elution buffer (50 mM TRIS-Cl, 10 mM EDTA, 1% SDS) supplemented with 20 µg of proteinase K. Samples were incubated for 2 hrs at 55°C and then overnight at 65°C to reverse crosslinking. The DNA was purified by QIAquick PCR Purification Kit (Qiagen). The qRT-PCR was performed by using Luna Universal qPCR Master Mix (New England Biolabs), and three different sets of primers (see supplemental Table 5), which were designed using Primer3 online tool. The prediction of possible FoxO1-binding sites in the 3.5 kb promoter region of the *GAB1* gene was performed with ContraV3 online tool. The non-specific primer-set was designed into the 2nd intron of *GAB1* where there is no predicted binding site for FoxO1 (forward: 5'-CAGTCAGTCTAGTAGGAGGGACAA-3', reverse: 5'-CTGAAAAGATCACTGCTGCTGCTA-3'). Two sets of primer were designed for the promoter region with predicted binding sites for FoxO1 (TBS no. 4: forward 5'-TTTGGGGCTTTTTACAAAT-3', reverse 5'-TGCCTACTTCCTTGTGTGTTTC-3'; TBS no.10: forward 5'-ATGCTGCCTATGGGAGAAGA-3', reverse 5'-AAACCAAAGCACTTCTTTTTAAGT-3'). The results were calculated as % of input.

### Confocal microscopy

The MEC1 cells were plated on poly-L-lysine coated (0.01%) glass for 30 min. Glass-attached MEC1 cells or primary CLL cells in suspension were subsequently fixed with 1% paraformaldehyde for 15 min/room temperature and washed (2x) with TBS-T. The 1 hr long blocking step in 5% BSA was followed by overnight incubation in primary antibody against FoxO1 (#2880, 1:100; Cell Signaling). The next day cells were washed (3x) in TBS-T and incubated in a mixture of secondary antibody (anti-Rabbit, Alexa-647 #4414, 1:250; Cell Signaling) and Phalloidin-iFLuor488 (1:1000; Abcam) for 90 min/room temperature (in dark). Subsequently, three wash steps with TBS-T were followed by staining with DAPI (1:1000; 15 min; Abcam), and cells were mounted to glass slides using Vectashield (Vector laboratories), and visualized on confocal microscope Leica DM5500 Q with TCS SPE confocal laser scanning system.

### Cell motility by holographic microscopy

Cell motility speed and other measurements were performed as described previously.<sup>15-17</sup> Briefly, tissue culture treated  $\mu$ -Slide (Ibidi) with 0.8 mm channel height was first filled with the culture medium to coat the substrate with serum proteins. After several minutes, the medium was removed and the  $\mu$ -Slide channel was filled with 200  $\mu$ l of cell suspension containing 10 000 exponentially growing MEC1 cells in a conditioned medium to achieve a subconfluent culture. Cells were incubated for 1 h at 37°C in a humidified atmosphere enriched with 5% CO<sub>2</sub>. The  $\mu$ -Slide with cells was then positioned on the stage of our Multimodal Holographic Microscope Q-PHASE (Tescan/Telight) and subjected to time-lapse recording for 1 h with 10 s lapse-interval using 10 $\times$  objective lenses 0.3 NA using the holographic mode measuring the optical thickness of cells with an accuracy of 2 nm. The recording was repeated 3 times for each cell type on two different days producing 12 time-lapse sequences which were processed using in-house developed image processing procedure using Mathematica (Wolfram Research), which removes background fluctuations, reconstructs and subtracts the background, converts the optical thickness of cells into their dry mass distributions, segments the cells, calculates centroids of dry cell mass, and morphometric parameters of *Circularity*, *Elongation*, *Mass* and *Spreading* defined as:

$$Circularity = \sqrt{\frac{(4 \pi A)}{P^2}}$$

where  $A$  is cell area in  $\mu\text{m}^2$  and  $P$  is the perimeter length in  $\mu\text{m}$ ;

$$Elongation = 1 - \left(\frac{Width}{Length}\right)$$



where *Width* and *Length* are the smallest and largest axes of the best fit ellipse respectively;

$$Spreading = A/Mass$$

where *Mass* is the total dry mass of a cell expressed in pg (picogram =  $10^{-12}$  g).

The software also tracks the cells in time on the basis of the nearest cell with a similar dry mass in the next frame. Tracked centroids were processed in order to calculate *Displacements* and *Persistences*. *Persistence* was defined as the ratio of direct translocation in 60 s and the wiggly track distance was determined as the sum of six 10 s displacements. *The Persistence* of a cell moving in a straight line is 1, and bending of the trajectory reduces the *Persistence* towards 0.

### **Immunohistochemistry of paraffin-embedded tissues**

Immediately after the tissue of experimental animals was dissected out, it was fixed in 4% paraformaldehyde pH 7.4 at room temperature overnight. The FFPE tissue sections (1  $\mu$ m) were automatically processed and stained in VENTANA BenchMark Ultra system. Universal DAB Detection Kit (Ventana) was used for staining in combination with UltraView Amplification Kit (Ventana). Counterstaining was achieved by using Hematoxylin II (Ventana) and post-counterstaining by using Bluing reagent (Ventana). Immunostaining was performed using the anti-CD20 (for MEC1 cells; M0701, DAKO) or anti-CD45 (for primary CLL cells; M0755, DAKO) antibody.

### **Immunohistochemistry of cryopreserved tissues**

Immediately after the tissue of experimental animals was dissected out, it was fixed in 4% paraformaldehyde pH 7.4 at 4 °C for 5 hrs. Subsequently, liver and spleen were cryopreserved in 30% sucrose at 4 °C overnight and embedded in OCT medium (Tissue-Tek, 4583) on dry ice. Femurs were decalcified in 10% EDTA pH 7.4 for 7 days at 4 °C prior to cryopreservation and OCT embedding. Samples were sectioned on a cryostat (Leica CM1850UV) as 14- $\mu$ m thick slices and collected on SuperFrost Plus Adhesion slides (Thermo Fisher Scientific, J1800BMNZ). Staining with primary antibody anti-mouse collagen IV (COL4, AbD Serotec, 2150-1470; 1:500) was performed at 4 °C overnight, followed by incubation with Alexa-conjugated secondary antibody (Invitrogen; 1:1000) at room temperature for 2 hrs. Cell nuclei counterstaining was performed with DRAQ5 Fluorescent Probe Solution (Thermo Fisher Scientific, 62251), and slides were mounted with Fluoromount Aqueous Mounting Medium (Sigma–Aldrich; F4680). Imaging was performed using Zeiss LSM880 laser scanning confocal microscope. ZEN2.1 (ZEISS) and Imaris (Bitplane) software was used for image processing.

### **Statistical analysis**

Differences in expression levels between paired samples were compared using paired t-test or Wilcoxon matched matched-pairs test and differences in non-matched groups were compared using unpaired t-test or Mann-Whitney U test. The appropriate tests were chosen based on the results of Shapiro-Wilk test of normality of input data. Statistical analysis of GAB1 inhibitors' effect on cell viability in comparison to their combination with ibrutinib was analysed by 2-way ANOVA including Tukey test. All analysis were performed in GraphPad v8.0.1.

### **Data Sharing Statement**

The results of the RNAseq analysis and data deposition may be found above. For other original data or detailed protocols, please contact the corresponding author.

**2) Supplemental Figures**

**Supplemental Figure 1**

| Color                                                                              | Sample                                      |
|------------------------------------------------------------------------------------|---------------------------------------------|
|  | CD5 <sup>dim</sup> FSC-A <sup>low</sup>     |
|  | CD5 <sup>bright</sup> FSC-A <sup>high</sup> |

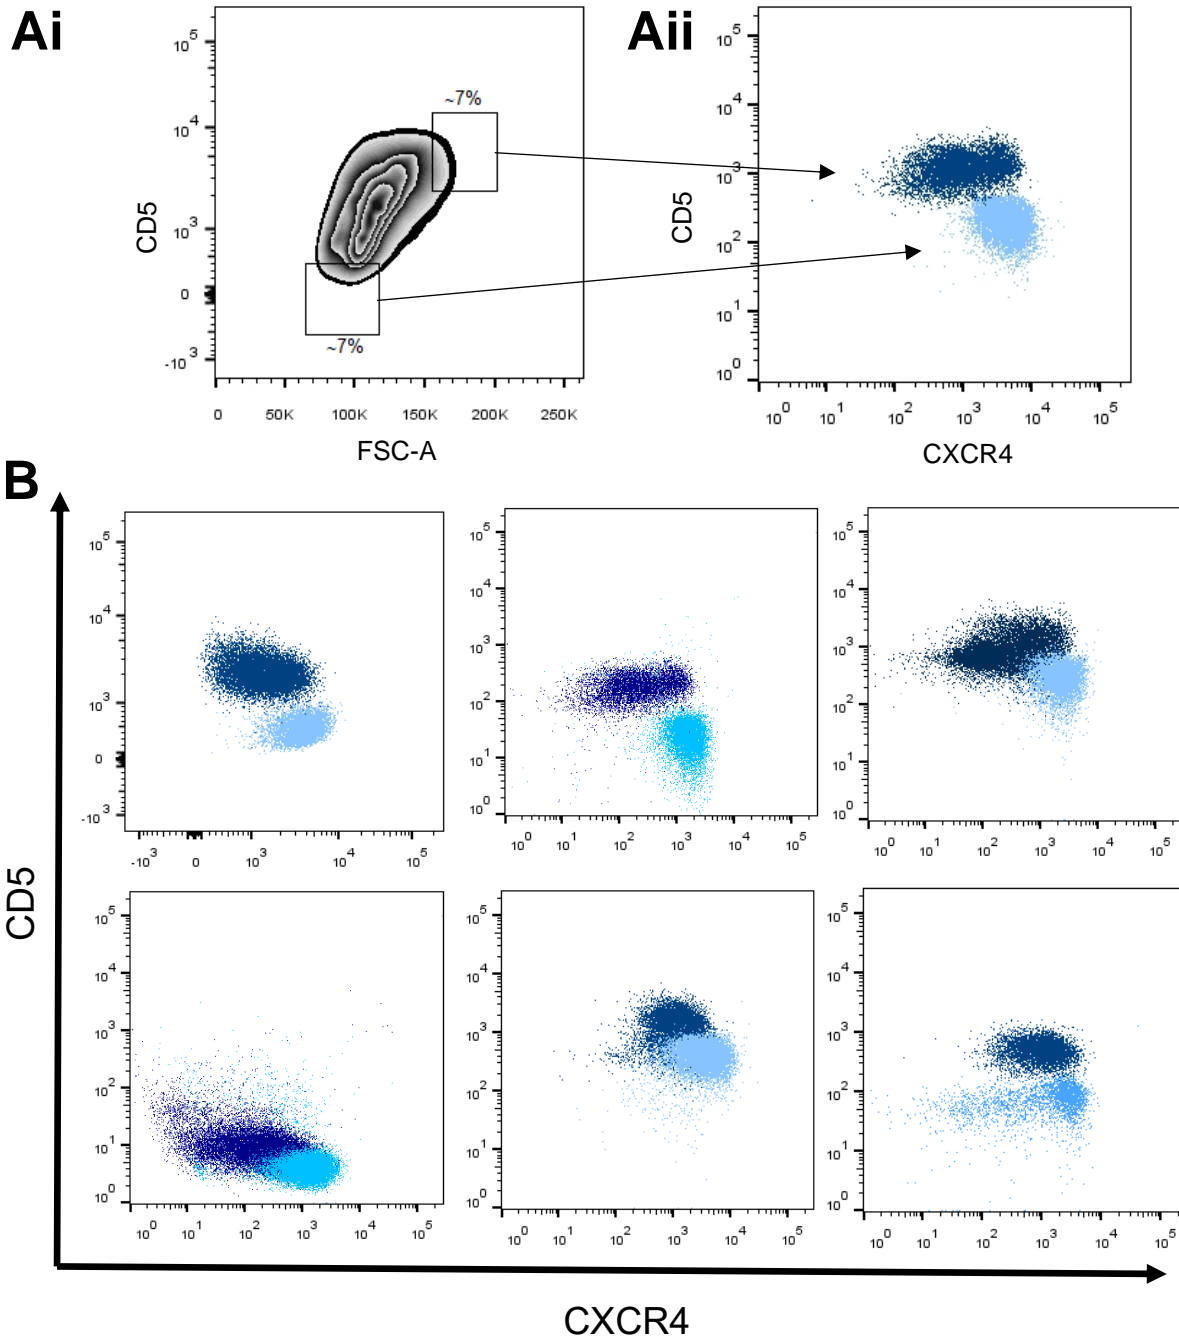

**Supplemental Figure 1. (Ai)** Representative example of a gating strategy for sorting of CLL cells according to CD5 and FCS-A (forward scatter area). CXCR4/CD5 subpopulations were sorted according to CD5 and forward scatter area (CXCR4<sup>dim</sup> cells have a higher FSC-A). The CD5/FSC-A was used to prevent labeling by an antibody binding to the CXCR4 receptor, which would interfere with the migration to SDF1 and potentially other chemokines. **(Aii)** Evaluation of CXCR4 and CD5 expression in cells sorted according to the gating strategy shown in [Ai]. Small aliquotes of sorted CD5<sup>dim</sup>FSC-A<sup>low</sup> and CD5<sup>bright</sup>FSC-A<sup>high</sup> cells

(correspond to CD5<sup>dim</sup>CXCR4<sup>bright</sup> and CD5<sup>bright</sup>CXCR4<sup>dim</sup> cells, respectively) were stained for CXCR4 and measured by flow cytometry to validate CXCR4 cell-surface levels and separation of CXCR4/CD5 subpopulations (this validation was performed in all samples used for experiments below). The sorting approach using CD5/FSC-A was successful in separating CXCR4/CD5 subpopulations in approx. 75% of CLL cases and only the samples with an acceptable profile of CXCR4/CD5 after validation by flow cytometry were used in further experiments. **(B)** Validation of CXCR4/CD5 expression in other CLL samples sorted according to FCS-A/CD5.

## Supplemental Figure 2

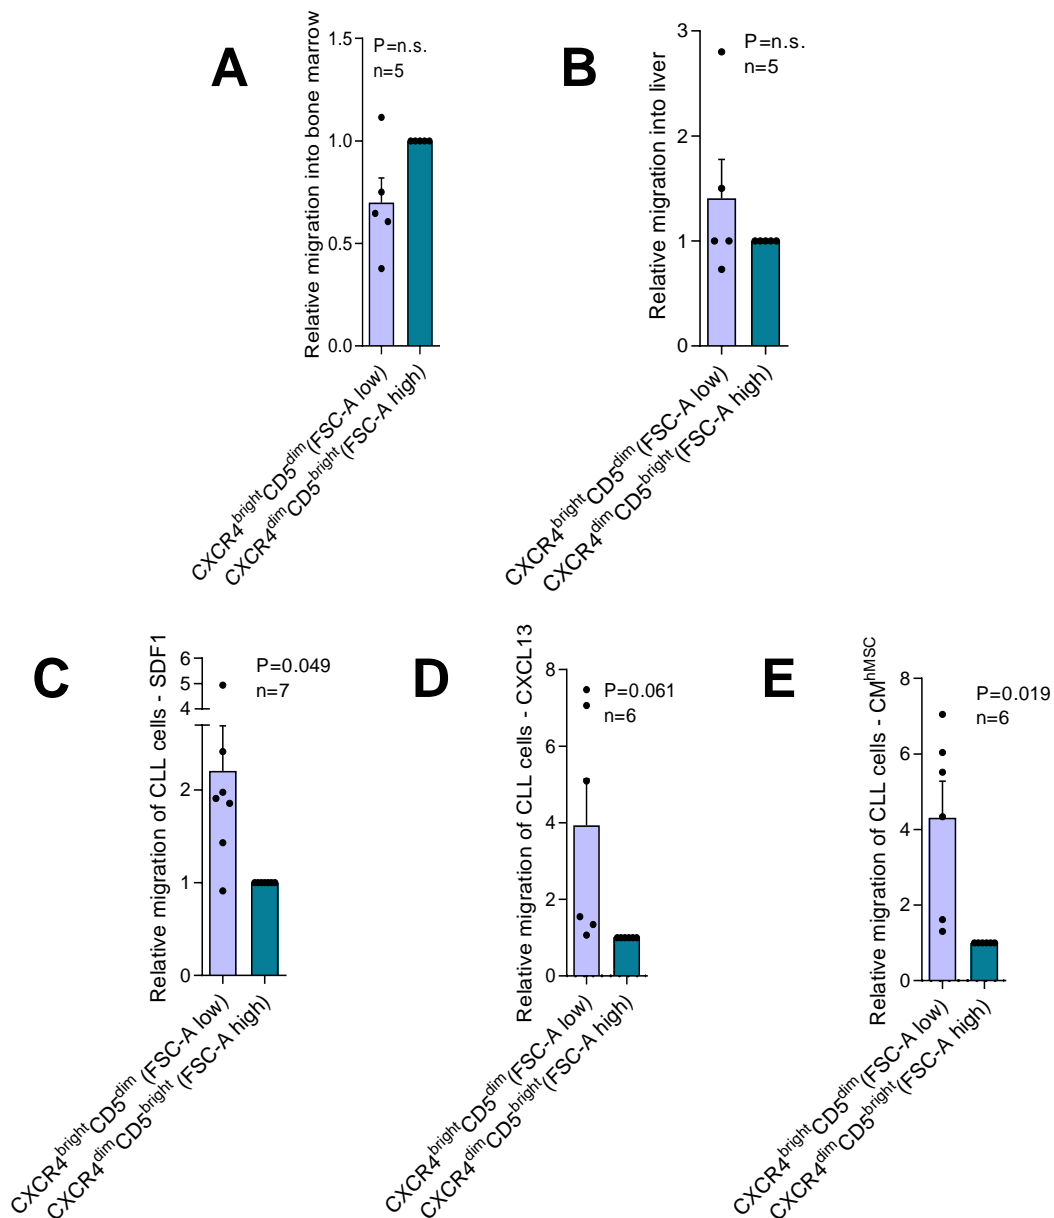

**Supplemental Figure 2.** Competitive migration assay of primary CLL cells sorted according to CD5/FSC-A (as surrogate markers for CD5/CXCR4 subpopulations, the cell-surface levels of CXCR4/CD5 were validated after sorting, see Supplemental Fig. 1). **(A-B)** Sorted cells were stained with two different CellTrace dyes, mixed in a 1:1 ratio, and injected into the tail vein of NGS mice (see Fig. 2A). Migration was allowed for 4 hrs, and then bone marrow **(A)** and liver **(B)** were analyzed for the presence of CLL cells (n=5). The numbers of CLL cells infiltrating bone marrow or liver were markedly lower in comparison to the spleen (Fig. 1A). **(C-E)** Competitive migration assay of CXCR4/CD5 CLL cell subpopulations towards SDF1 **(C)**, CXCL13 **(D)**, or conditioned media **(E)** produced by bone marrow mesenchymal stromal cells from a healthy donor (CM<sup>hMSC</sup>). Sorted and validated CXCR4/CD5 subpopulations were stained with two different CellTrace dyes, mixed in a 1:1 ration, and loaded into transwells.

**Supplemental Figure 3**

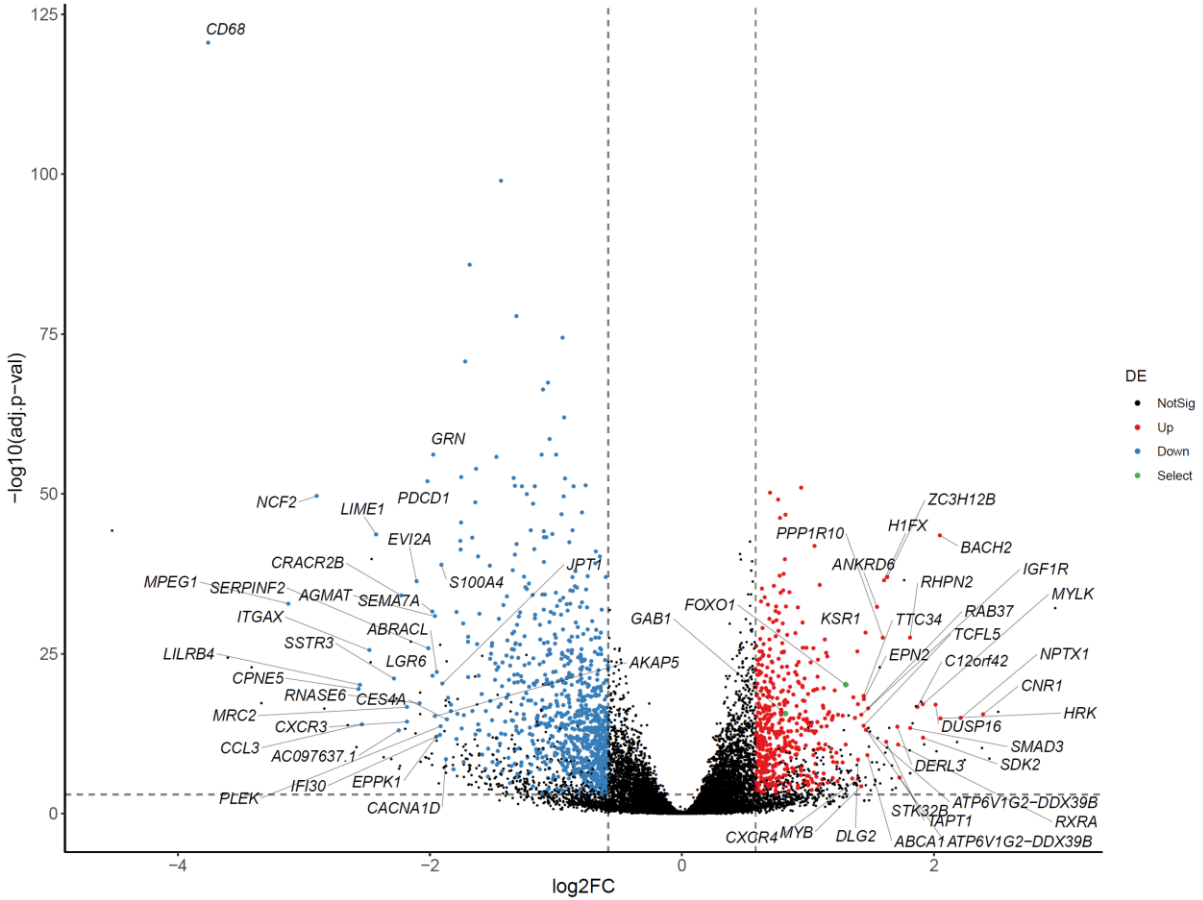

**Supplemental Figure 3.** Volcano plot depicting differentially expressed genes in CXCR4/CD5 subpopulations. Vertical dashed lines represent a fold-change of >1.5-fold. The horizontal dashed line represents adjusted P-value <0.001. Blue color represents genes relatively down-regulated in CXCR4<sup>bright</sup>CD5<sup>dim</sup> cells, and the red color represents genes relatively up-regulated in CXCR4<sup>bright</sup>CD5<sup>dim</sup> cells (cell sorting strategy shown in Fig. 1B). FoxO1 and GAB1 are depicted in green color. Log2FC stands for a fold-change in log2 scale, -log10(adj.p-val) stands for adjusted P-value in a log10 scale.

## Supplemental Figure 4

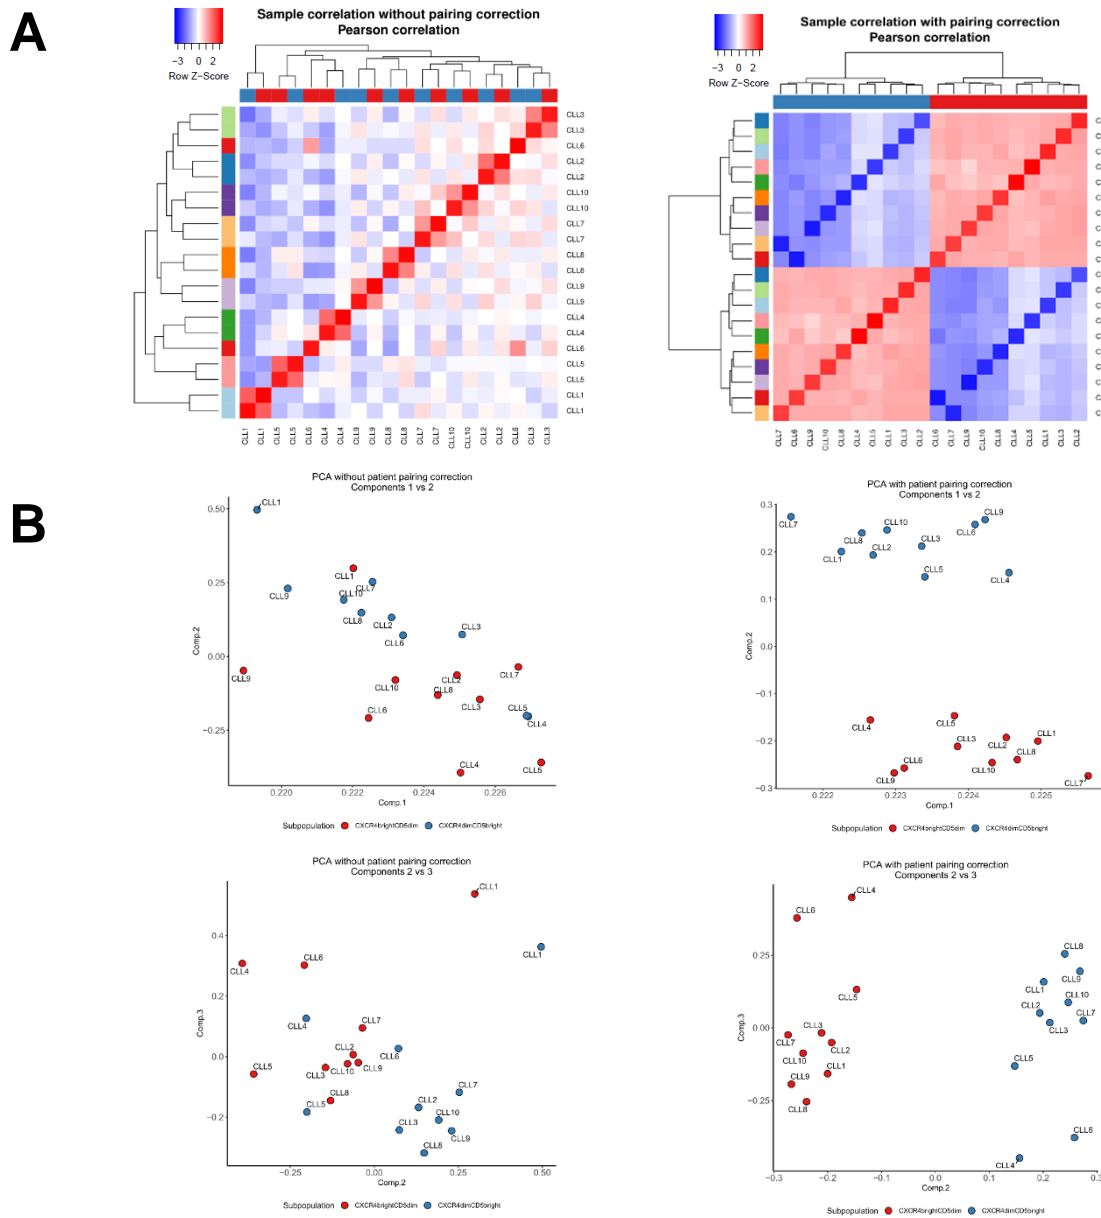

**Supplemental Figure 4. (A)** Pearson correlation for gene expression between all samples used for RNAseq analysis. The correlation was calculated from log<sub>2</sub> normalized gene counts (DESeq) + 1 to avoid logarithms of 0 counts. Correlation heatmaps for both sample pairing uncorrected (top) and corrected for paired CXCR4/CD5 subpopulations (bottom) are shown. The heatmap colors were normalized to row Z-score. Red color depicts CXCR4<sup>bright</sup>CD5<sup>dim</sup> cells, and blue color depicts CXCR4<sup>dim</sup>CD5<sup>bright</sup> cells, row colors represent individual patients. The data were corrected for pairing by limma (v3.40.6) „removeBatchEffect“ function.<sup>18</sup> **(B)** Principal Component Analysis (PCA) of all samples used for RNAseq analysis was calculated from log<sub>2</sub> normalized counts (DESeq1) + 1 to avoid logarithms of 0 counts. PCA components for both sample pairing uncorrected (left) and corrected for paired CXCR4/CD5 subpopulations (right) are shown. Red color depicts CXCR4<sup>bright</sup>CD5<sup>dim</sup> cells, and blue color depicts CXCR4<sup>dim</sup>CD5<sup>bright</sup> cells. The data were corrected for pairing by limma (v3.40.6) „removeBatchEffect“ function.<sup>18</sup>

**Supplemental Figure 5**

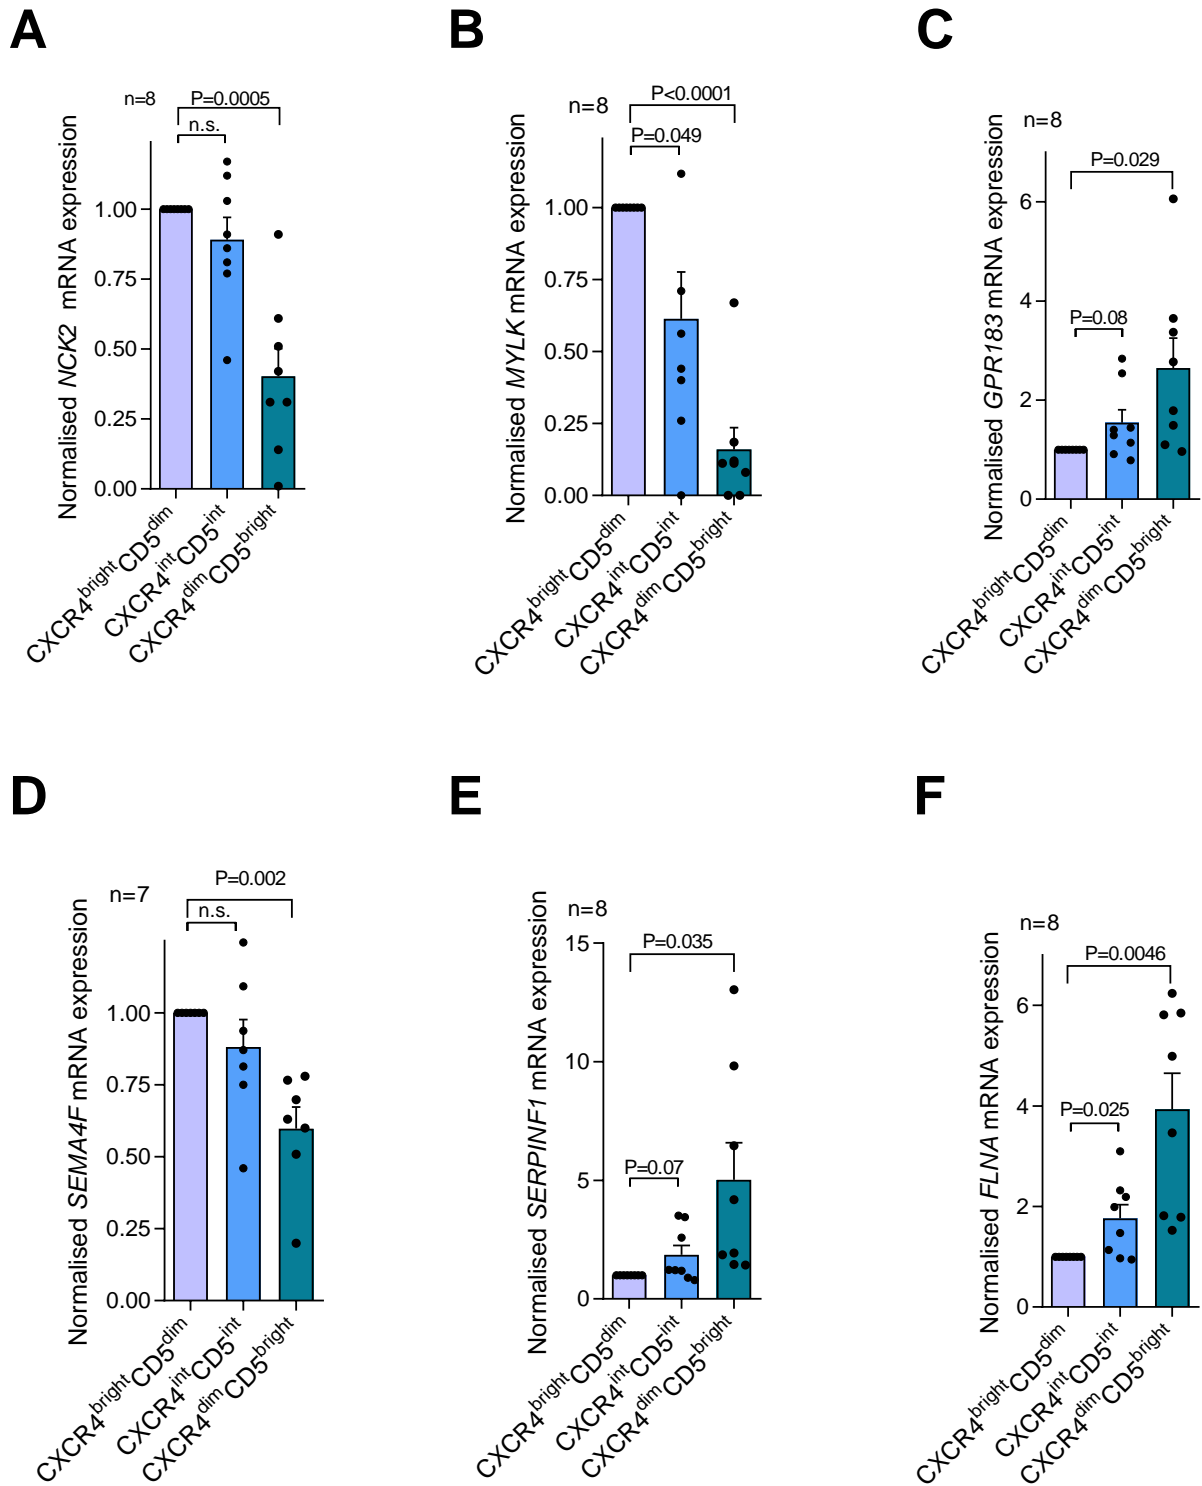

**Supplemental Figure 5.** Analysis of six selected migration-related genes by qRT-PCR in sorted CXCR4/CD5 subpopulations (for cell sorting strategy, see Fig. 1B). The mRNAs were randomly selected from differentially expressed migration-related genes identified by RNAseq (Fig. 1C), and their expression was validated in an independent set of sorted samples. The CXCR4<sup>int</sup>CD5<sup>int</sup> represents a transitional intermediate (int) subpopulation between CXCR4<sup>dim</sup>CD5<sup>bright</sup> and CXCR4<sup>bright</sup>CD5<sup>dim</sup> cells.



**Supplemental Figure 6**

**A**

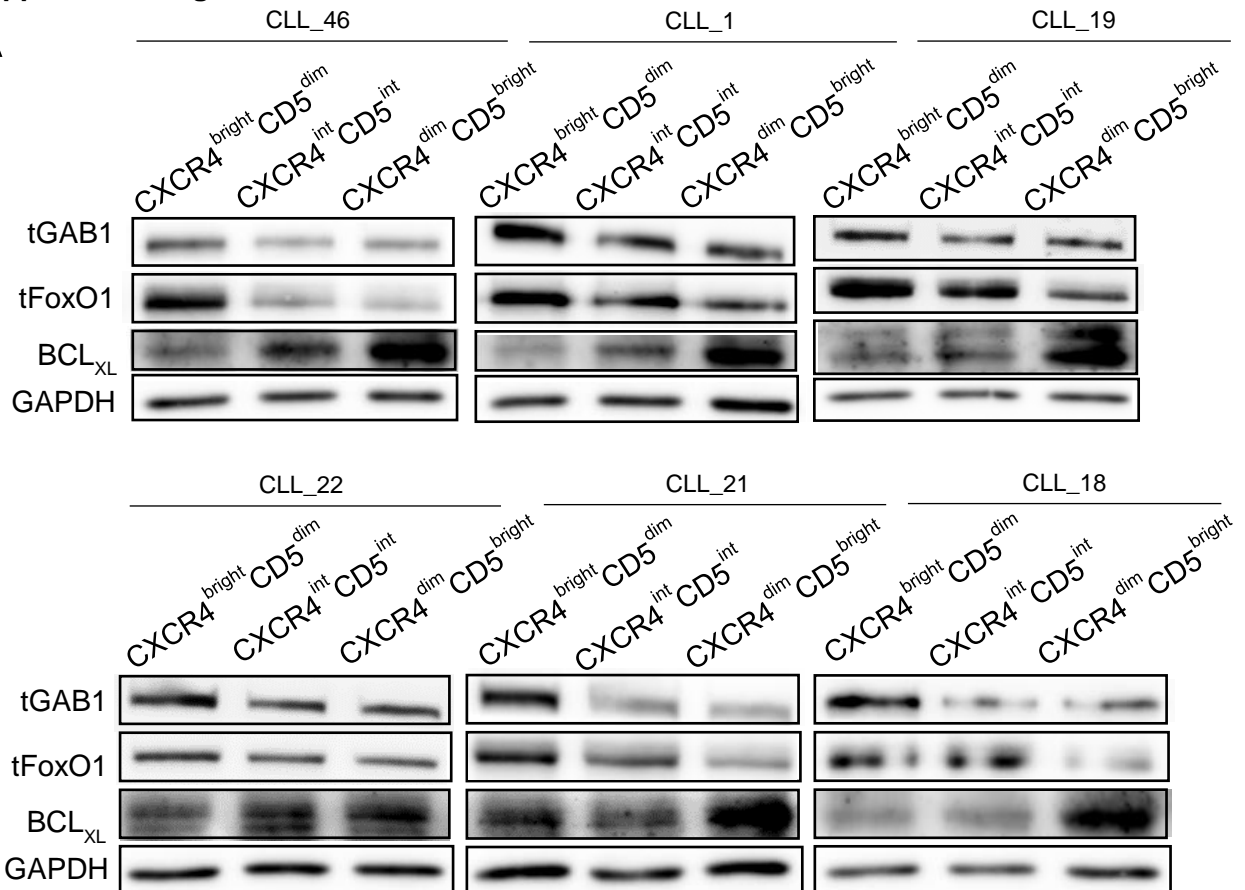

**B**

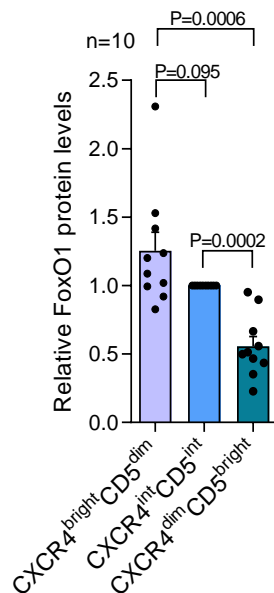

**C**

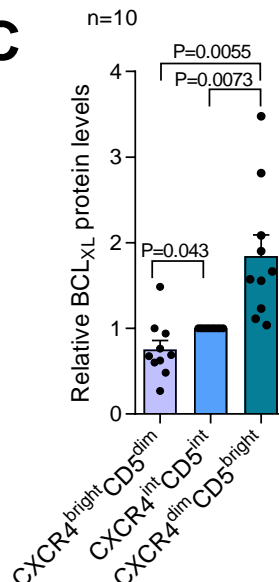

**Supplemental Figure 6. (A)** Additional immunoblots for proteins of interest from sorted CXCR4/CD5 subpopulations. The CXCR4<sup>int</sup>CD5<sup>int</sup> represents a transitional intermediate (int) subpopulation between CXCR4<sup>dim</sup>CD5<sup>bright</sup> and CXCR4<sup>bright</sup>CD5<sup>dim</sup> cells. **(B-C)** and Densitometric quantification of FoxO1 (B) and BCL<sub>XL</sub> (C) protein levels in sorted CXCR4/CD5 subpopulations as analyzed by immunoblot. BCL<sub>XL</sub>, an antiapoptotic protein, serves as a positive control for microenvironmental interactions. For cell sorting see Fig. 1B and for densitometric analysis of protein levels, see Fig. 1G

Supplemental Figure 7

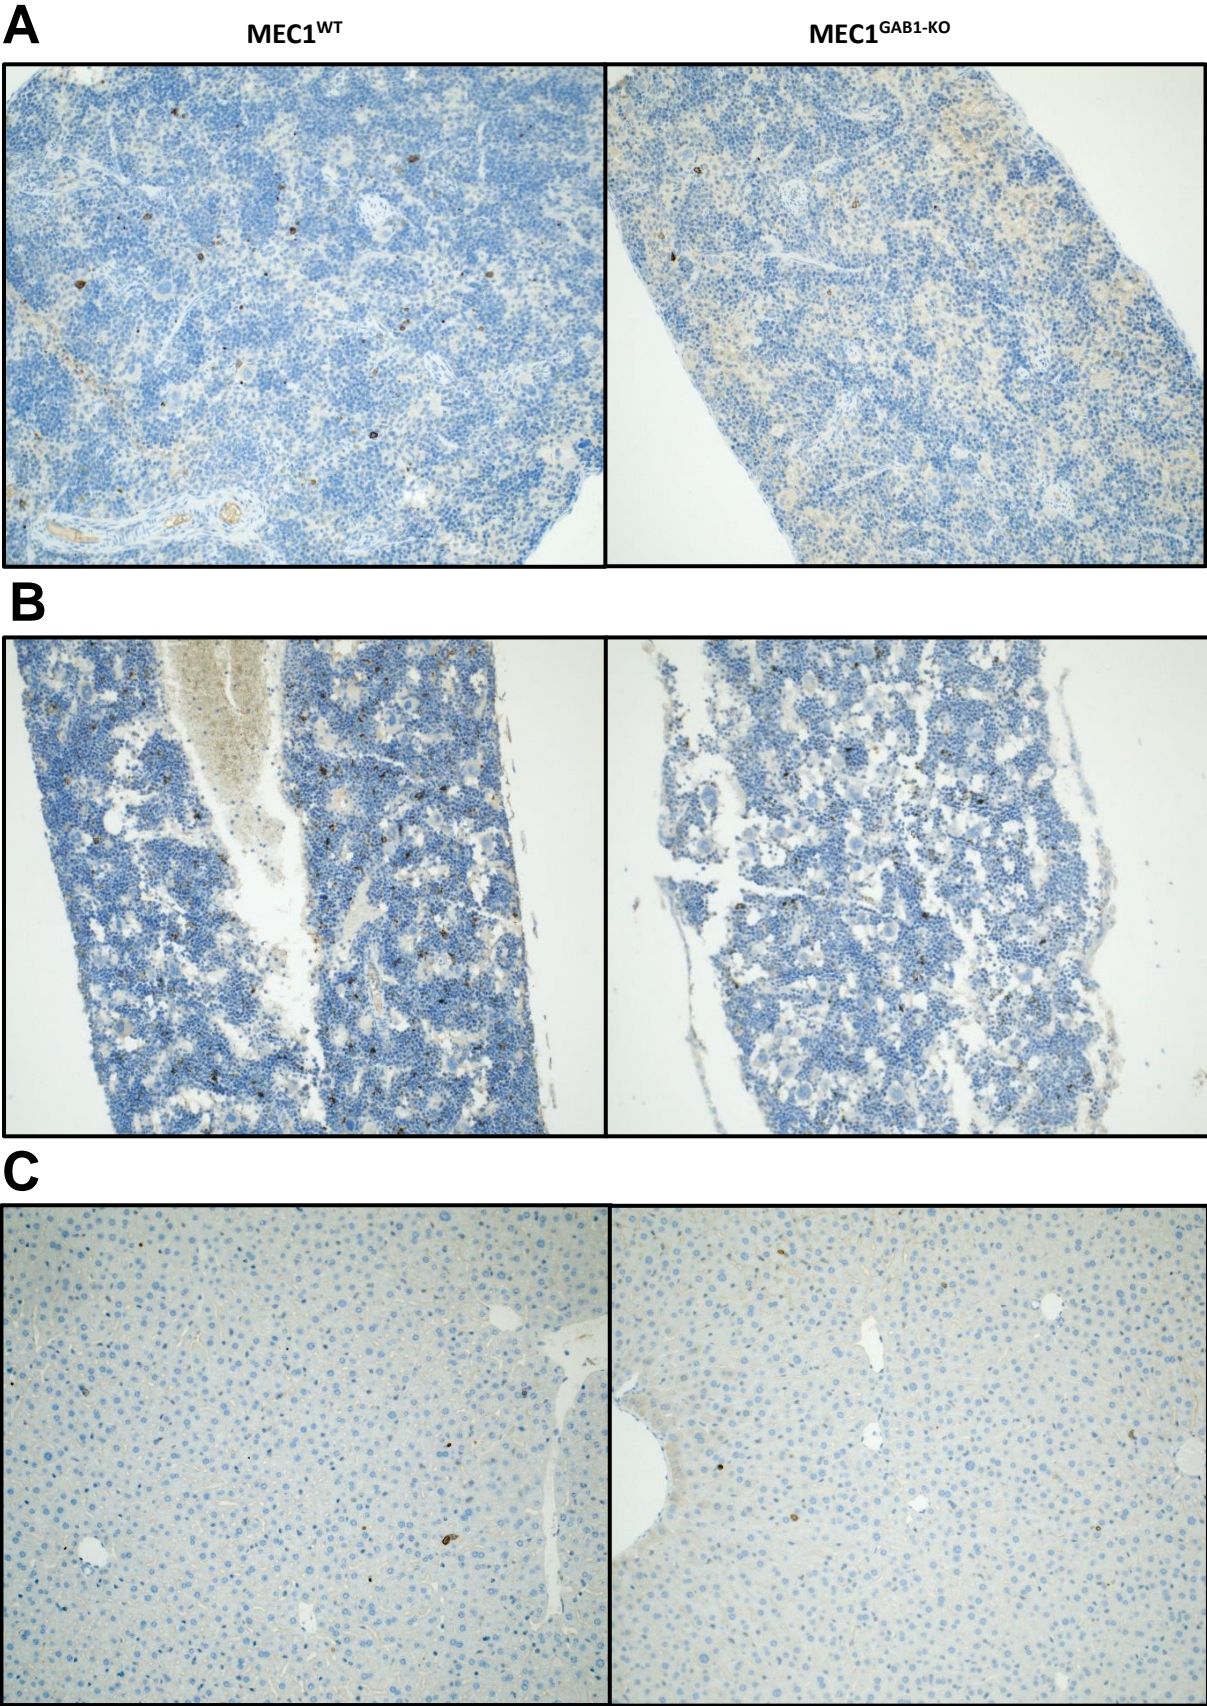

D

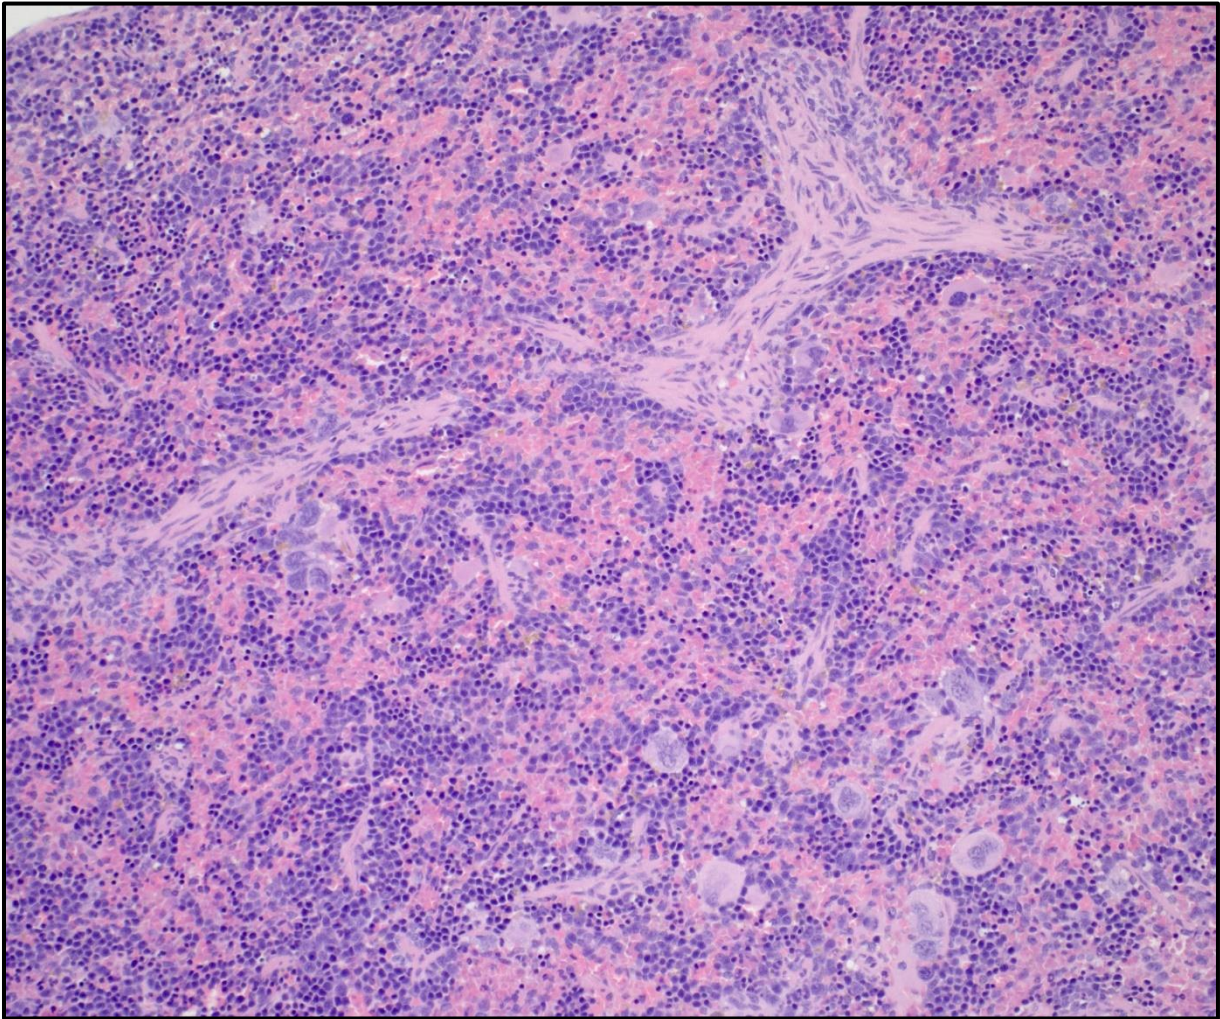

**Supplemental Figure 7.** Histological evaluation of spleen **(A)**, bone marrow **(B)**, and liver **(C)** of NSG mice transplanted with MEC1<sup>wt</sup> (*left*) or MEC1<sup>GAB1-KO</sup> (*right*) cells. In this experiment, MEC1<sup>wt</sup> or MEC1<sup>GAB1-KO</sup> cells were transplanted separately to individual NSG mice via a tail vein injection and sacrificed after 6 hrs. Tissue sections were stained with anti-human-CD20 antibody (brown signal) and the post-counterstaining by Bluing reagent (Ventana). The composition of the spleen structure in NSG mice is different from normal mouse spleen and reflects the absence of mature B/T/NK cells in these animals (see **D** for hematoxylin-eosin staining of the spleen, 20x). Therefore, the white pulp of the spleen is absent, and the organ is mainly formed by red pulp with a high content of overactive erythron and excessive erythropoiesis (including the presence of megakaryocyte). The migrated MEC1 cells were localized diffusely in the spleen, and there was no difference in tissue localization for GAB1-knockout versus GAB1-wt cells.

Supplemental Figure 8

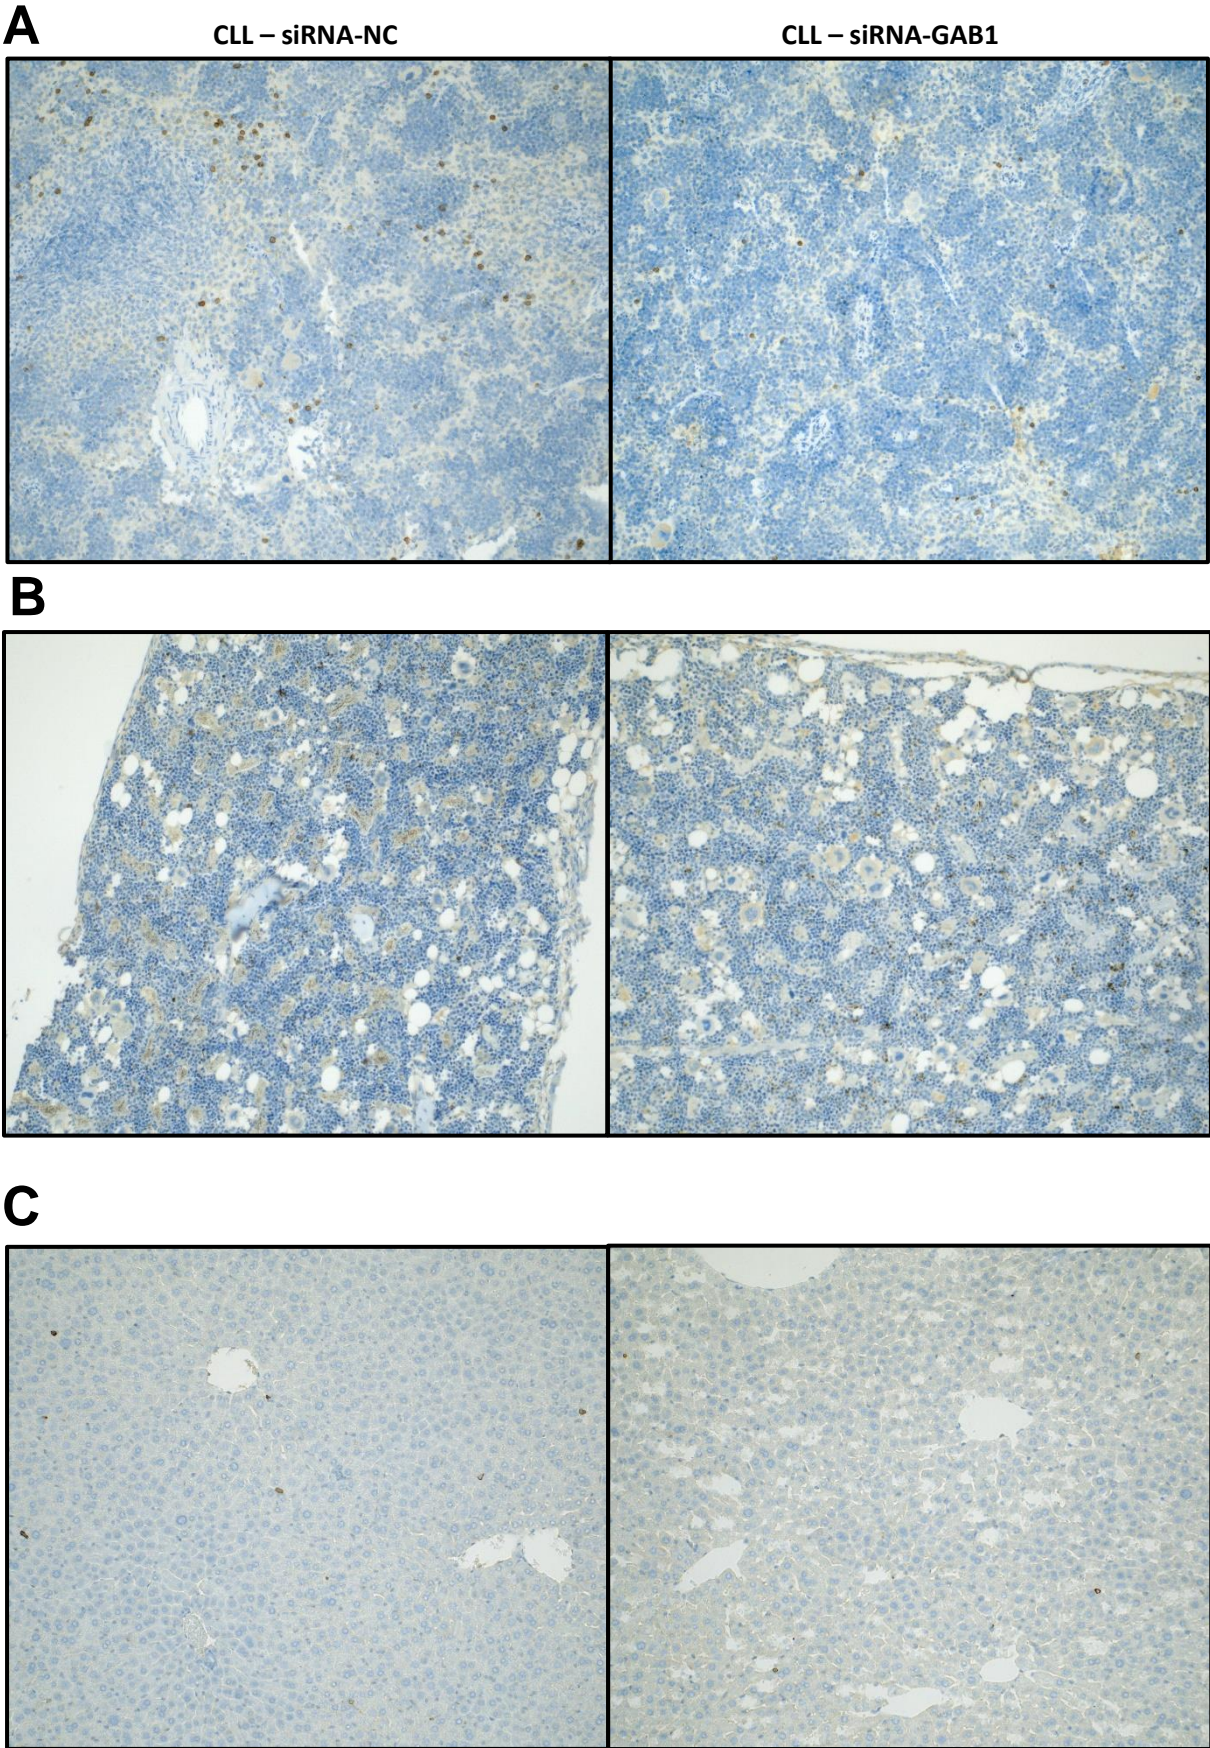

**Supplemental Figure 8.** Histological evaluation of spleen **(A)**, bone marrow **(B)**, and liver **(C)** of NSG mice transplanted with CLL cells transfected with siRNA against *GAB1* (siRNA-GAB1, *right*) or control siRNA (siRNA-NC, *left*). Cells were incubated for 48 hrs after transfection and then stained with Sytox Blue viability dye and sorted according to viability. Viable CLL cells ( $10 \times 10^6$  of siRNA-GAB1 or siRNA-NC transfected cells) were transplanted to individual NSG mice via a tail vein injection and sacrificed after 6 hrs. Tissue sections were stained with anti-human-CD45 antibody (brown signal) and the post-counterstaining by using Bluing reagent (Ventana). The composition of the spleen structure in NSG mice is different from normal mouse spleen and reflects the absence of mature B/T/NK cells in these animals (see Supplemental Fig. 10D for hematoxylin-eosin staining of the spleen, 20x). Therefore, the white pulp of the spleen is absent, and the organ is mainly formed by red pulp with a high content of overactive erythron and excessive erythropoiesis (including the presence of megakaryocyte). The migrated CLL cells were localized diffusely in the spleen, with a tendency for higher CLL cell infiltration in the trabecular system near the trabecular veins; however, there was no difference in the localization inside the studied organs for siRNA-GAB1 or siRNA-NC CLL cells. For patient characteristics, see Supplemental Tab1, CLL\_3.

**Supplemental Figure 9**

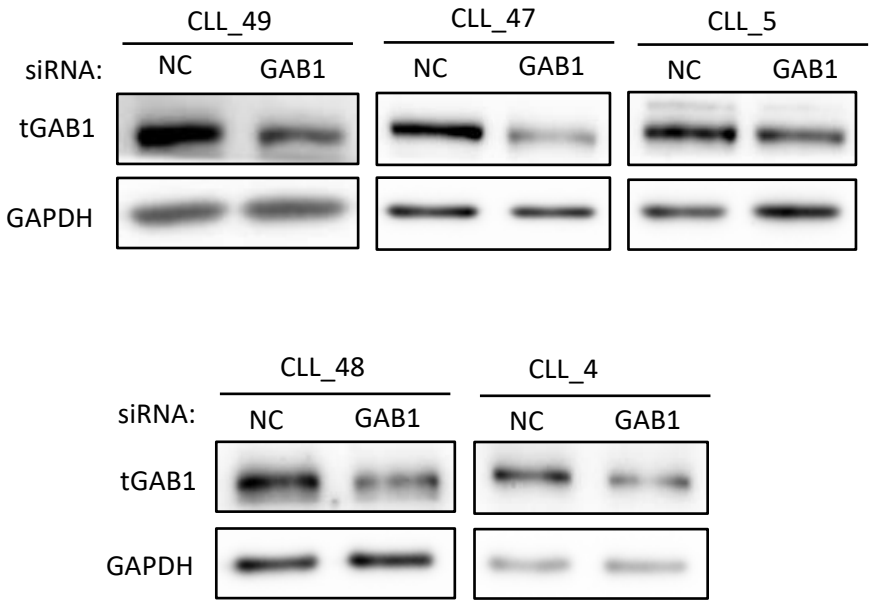

**Supplemental Figure 9.** Control immunoblots from primary CLL cells transfected with control siRNA (NC) or siRNA against *GAB1* (GAB1). Cells were incubated for 48 hrs and then stained with Sytox Blue viability dye and sorted according to viability. A small aliquot of sorted cells, was used for these control immunoblots, and the remaining cells were used for competitive migration assay in NSG mice.

### Supplemental Figure 10

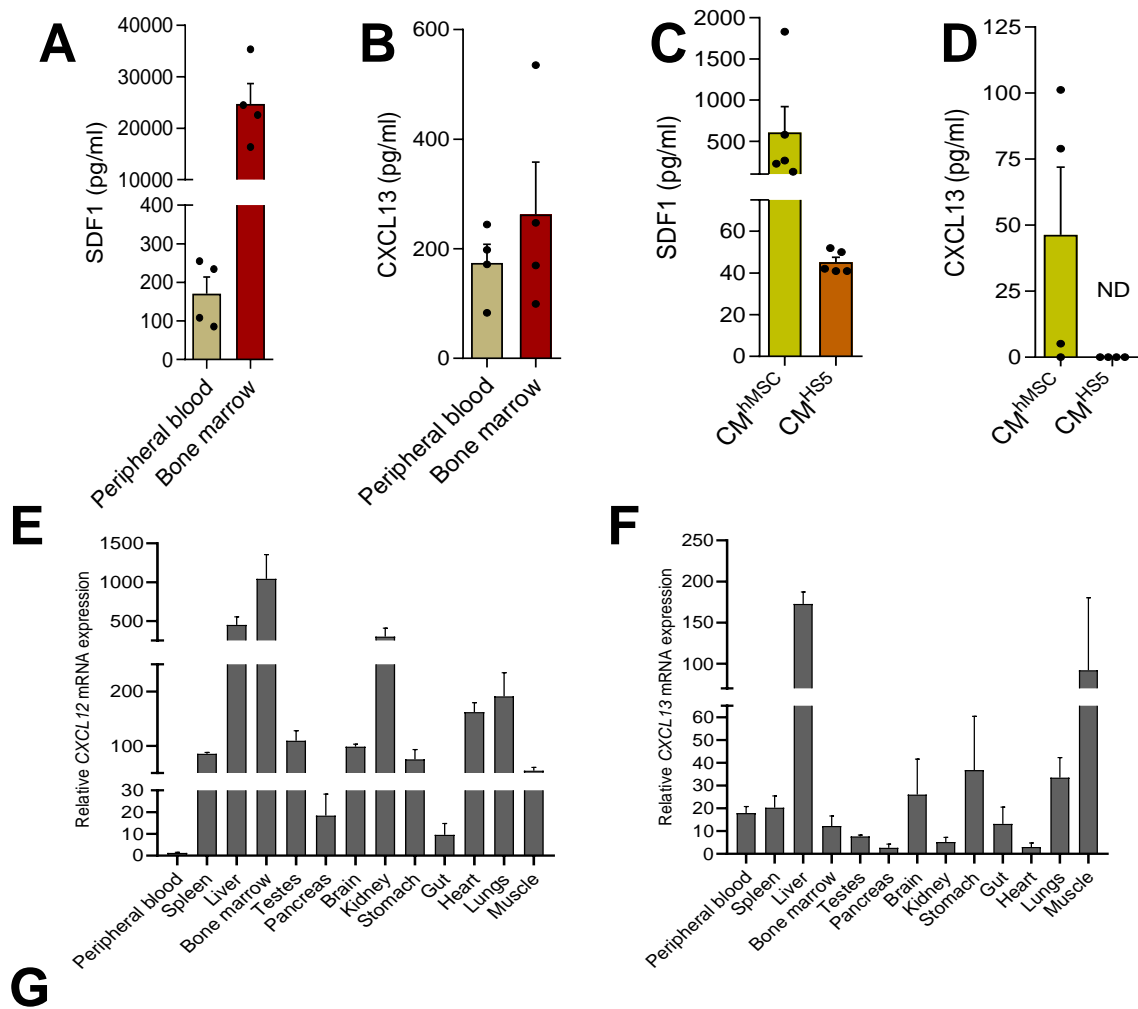

**G**

| Gene          | Peripheral blood cells | Spleen | Liver (neonatal) | Bone marrow | Testes | Pancreas | Brain (cortex) | Kidney (neonatal) | Stomach | Gut | Heart (neonatal) | Lungs | Muscle (juvenile) | Axillary Lymph Node | Thymus |
|---------------|------------------------|--------|------------------|-------------|--------|----------|----------------|-------------------|---------|-----|------------------|-------|-------------------|---------------------|--------|
| <b>CXCL12</b> | NA                     | 404    | 726              | 705         | 14     | 49       | 67             | 289               | 141     | 50  | 134              | 163   | 141               | 733                 | 304    |
| <b>CXCL13</b> | NA                     | 190    | 0.5              | 4           | NA     | 82       | NA             | 4                 | 29      | 15  | 2                | 29    | 3                 | 2039                | 18     |

**Supplemental Figure 10. (A-B)** Serum isolated from peripheral blood or bone marrow of CLL patients (n=4) was tested for SDF1 **(A)** or CXCL13 **(B)** levels by ELISA (R&D Systems). **(C-D)** Conditioned media produced by primary human mesenchymal stromal cells (CM<sup>hMSC</sup>) or by human stromal cell line HS5 (CM<sup>HS5</sup>) was analyzed for levels of SDF1 **(C)** or CXCL13 **(D)**. The replicates in C and D represent analyses of conditioned media from various passages of the cells. ND stands for “not-detectable”. **(E-F)** Relative expression of CXCL12 **(E)** and CXCL13 **(F)** mRNAs in different organs of the NSG mice. For this experiment, 3 NSG mice (without transplantation of malignant cells) were sacrificed, organs homogenized, RNA isolated, and subjected to qRT-PCR. **(G)** Publicly available data on CXCL12 and CXCL13 mRNA expression in different compartments of C57BL/6J mice (mice strain not used in this study). NA stands for “data not available”. Data are presented as TPM (Transcripts per Kilobase Million) and were obtained from *Expression Atlas database* (ArrayExpress: experiment E-MTAB-3579).<sup>19</sup>

**Supplemental Figure 11**

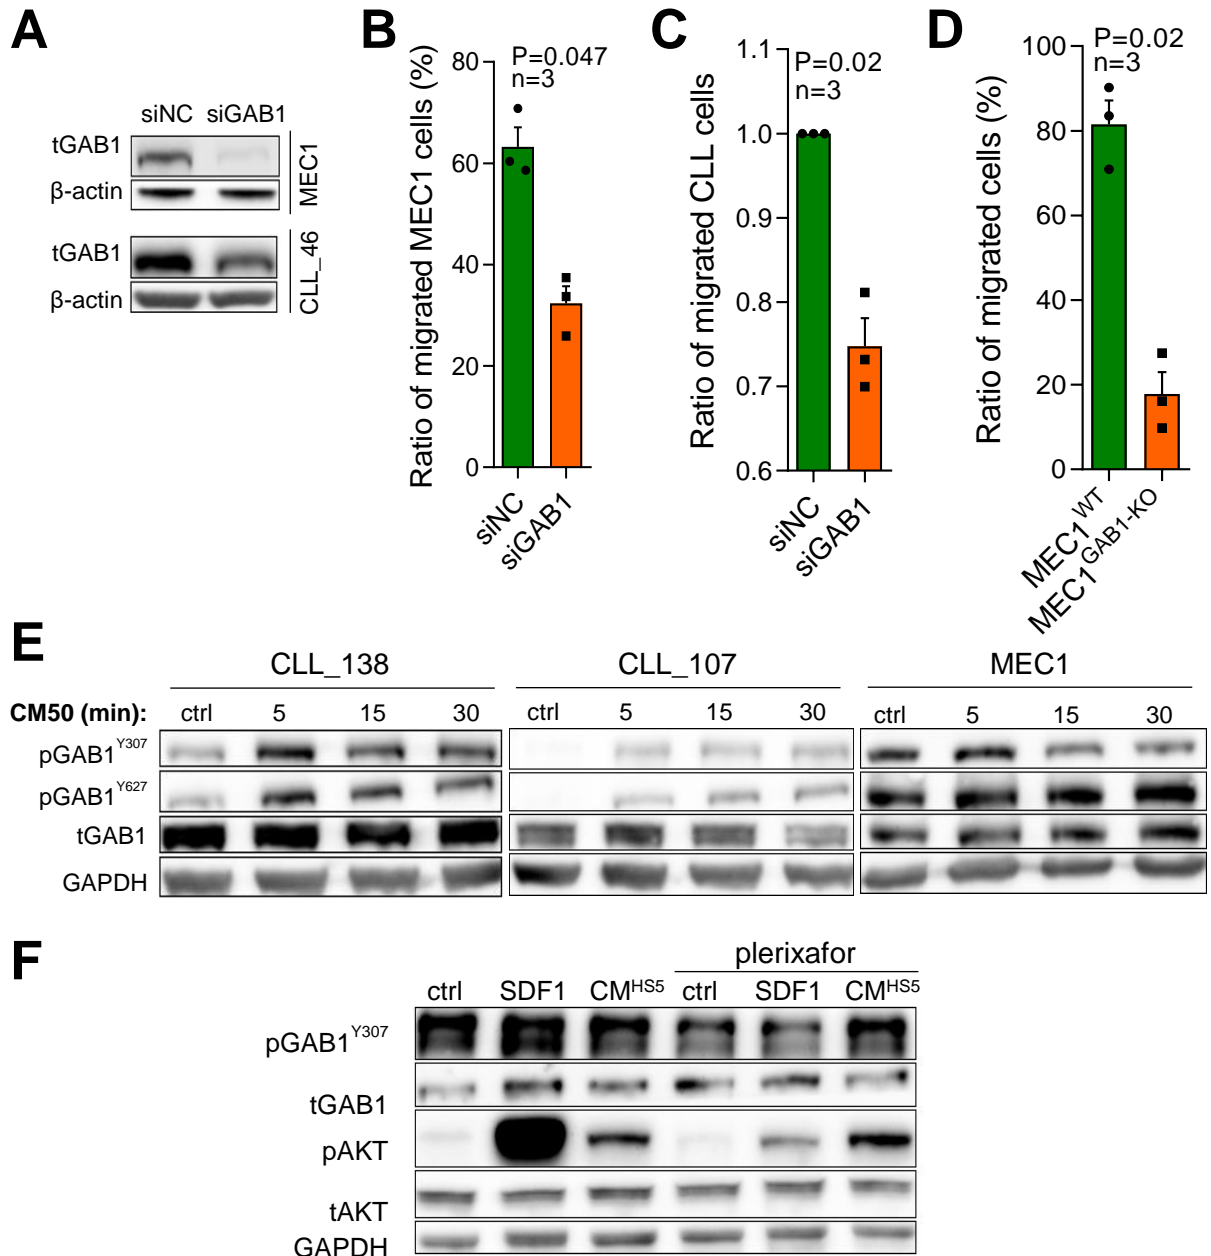

**Supplemental Fig. 11 (A)** Representative example of GAB1 silencing by siRNA in MEC1 (*top*) and primary CLL cells (*bottom*). **(B-C)** Migration of MEC1 cells (**B**) and CLL cells (**C**) towards 50% conditioned media produced by HS5 cells. CLL or MEC1 cells were transfected with siRNA against *GAB1* (siGAB1) or control siRNA (siNC). Migration across the transwell towards the 50% conditioned media produced by HS5 cells was allowed for 6 hrs (n=3), and the ratio of passed cells was measured by flow cytometry. **(D)** In vitro competitive migration assay of MEC1<sup>WT</sup> vs. MEC1<sup>GAB1-KO</sup> cells (cells stained as shown in Fig. 2B). Migration was allowed for 6 hrs towards conditioned media produced by HS5 stromal cells. **(E)** Representative immunoblot for primary CLL cells stimulated for various times (3-60 min) with recombinant SDF1 (100 ng/ml). **(F)** Representative immunoblot from primary CLL cells treated with 50% conditioned media produced by human stromal cell line HS5 (CM<sup>HS5</sup>), SDF1 (100 ng/ml), or their combination with CXCR4-inhibitor plerixafor. Plerixafor (5 μg/ml) was added 2 hrs prior to the cell treatment with SDF1 or conditioned media to ensure full CXCR4 inhibition. The control stands for cells treated with vehicle and cultured on plastic.



**Supplemental Figure 12**

**A**

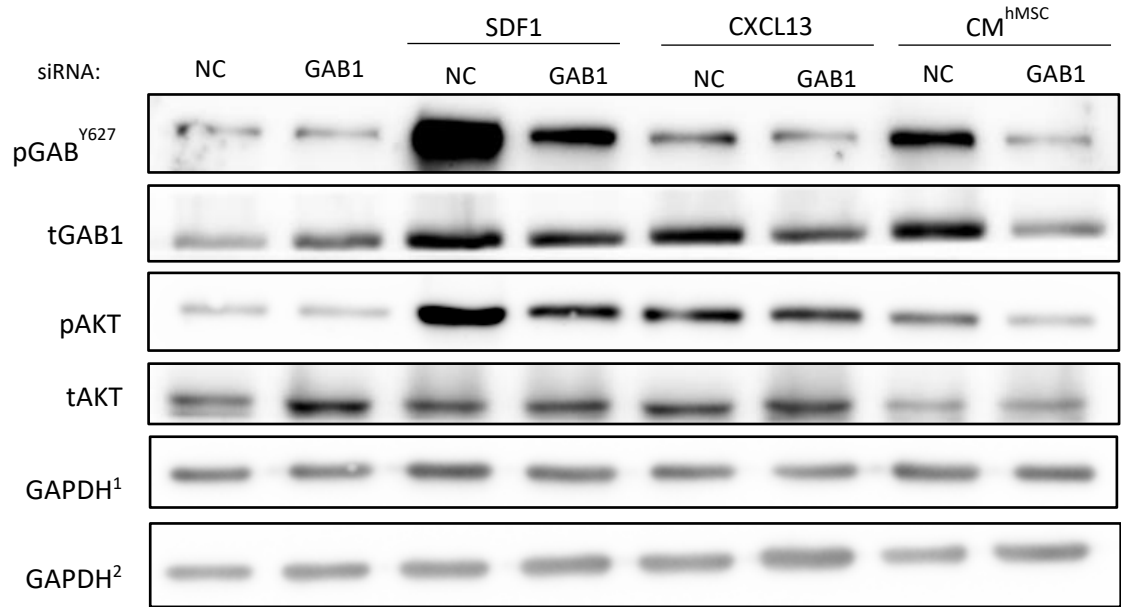

**B**

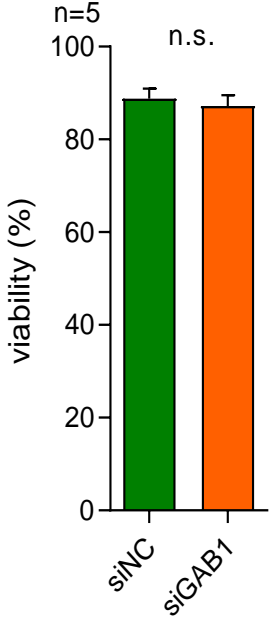

**C**

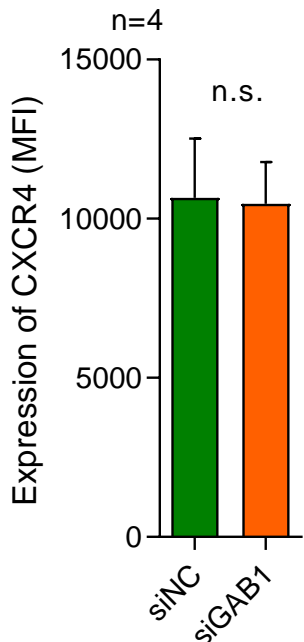

**Supplemental Figure 12. (A)** Additional immunoblot from primary CLL cells (CLL\_133) transfected with siRNA against GAB1 (GAB1) or a negative control (NC). Cells were (48 hrs post-transfection) stimulated for 10 min by SDF1 (100 ng/ml), or CXCL13 (250 ng/ml), or conditioned media produced by primary human mesenchymal stromal cells (CM<sup>hMSC</sup>). The immunoblot contains 2 endogenous controls (GAPDH) marked by upper index, because for technical reasons pGAB1 and pAKT (loading control GAPDH<sup>1</sup>) were analyzed on first gel and remaining proteins (loading control GAPDH<sup>2</sup>) on the second gel (identical protein loading and conditions). **(B-C)** Analysis of cell viability (A) and CXCR4 cell-surface expression (B) in primary CLL cells transfected with siRNA against GAB1 (siGAB1) or with control scrambled siRNA (siNC). Viability was measured by DiOC6/PI staining.

Supplemental Figure 13

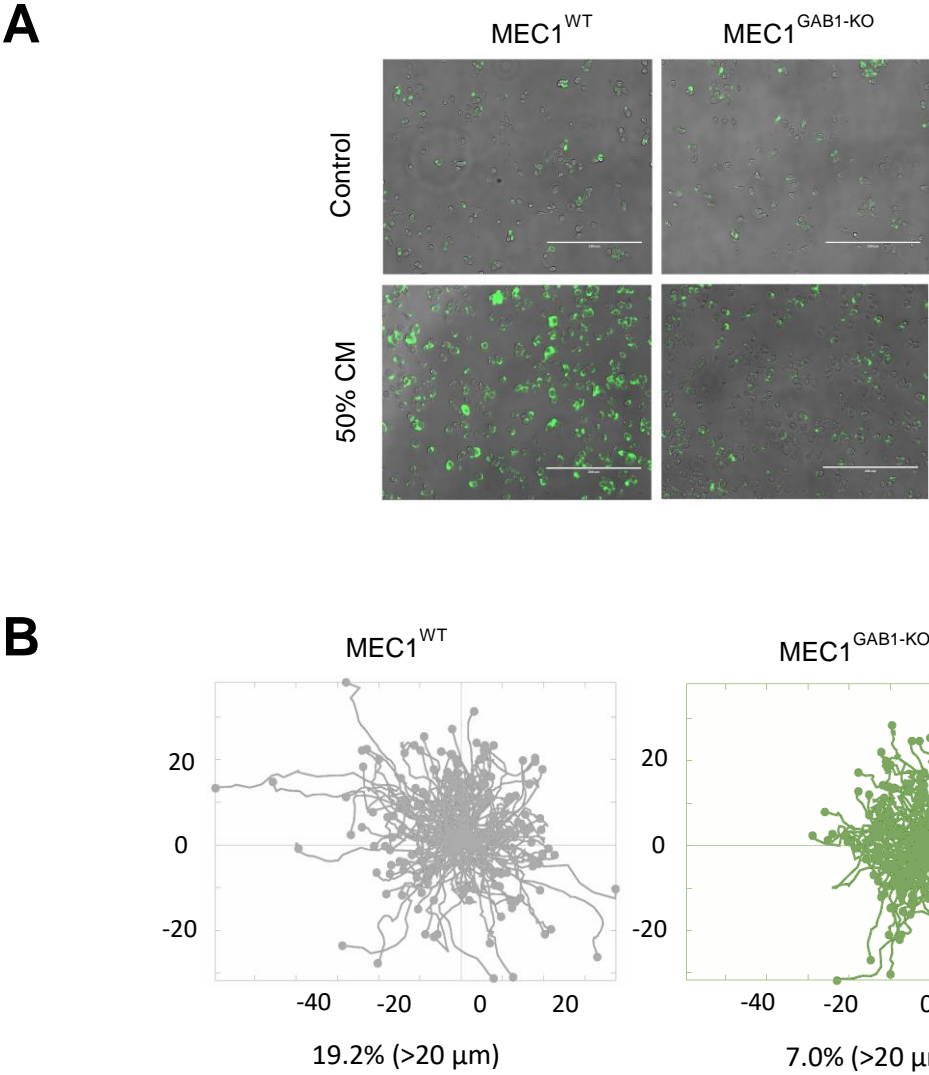

**Supplemental Figure 13. (A)** Representative image of F-actin polymerization in MEC1<sup>wt</sup> and MEC1<sup>GAB1-KO</sup> cells after treatment with 50% conditioned media produced by HS5 cells (15 min). MEC1 cells were subsequently fixed, and polymerized F-actin was visualized by fluorescent microscopy after Phalloidin-488 staining. **(B)** Representative rose plots with 5 min migration trajectories of MEC1<sup>wt</sup> vs. MEC1<sup>GAB1-KO</sup> cells in the presence of conditioned media produced by HS5 cells (shifted to a common origin, axis in μm). The percentage below the figure indicates the fraction of cells with trajectory >20 μm at 5 min in MEC1<sup>wt</sup> vs. MEC1<sup>GAB1-KO</sup> cells (19.2 vs. 7%, respectively; P<0.0001).

Supplemental Figure 14

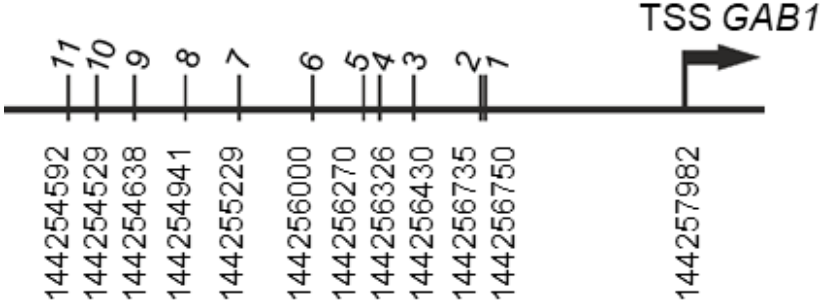

**Supplemental Figure 14.** Map of predicted transcription binding sites of FoxO1 protein in 3.5 kb promoter region of the *GAB1* gene (ContraV3). Predicted transcription binding sites are number 1-11 (at the top), and their genomic position is indicated.



**Supplemental Figure 16**

**A**

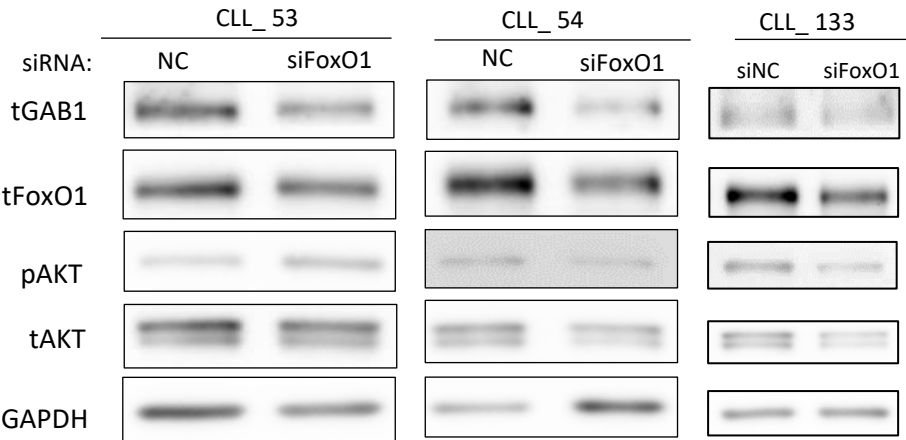

**B**

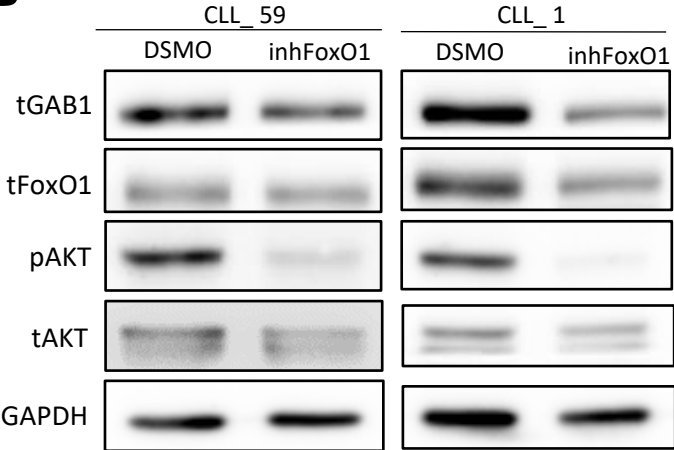

**C**

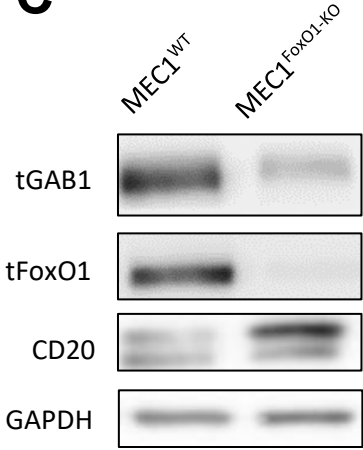

**Supplemental Figure 16. (A)** Immunoblots from primary CLL cells transfected with non-specific control siRNA (NC) or siRNA against *FoxO1* (siFoxO1). Cells were harvested 48 hrs post transfection. **(B)** Immunoblots from primary CLL cells treated with FoxO1 inhibitor (0,5 μM, 48 hrs). **(C)** Representative immunoblot for MEC1<sup>wt</sup> and MEC1<sup>FoxO1-KO</sup> cells. CD20 was used as a positive control of FoxO1 repression since FoxO1 is a negative regulator of CD20 transcription.<sup>21</sup> The same samples were used in Fig. 4F.

## Supplemental Figure 17

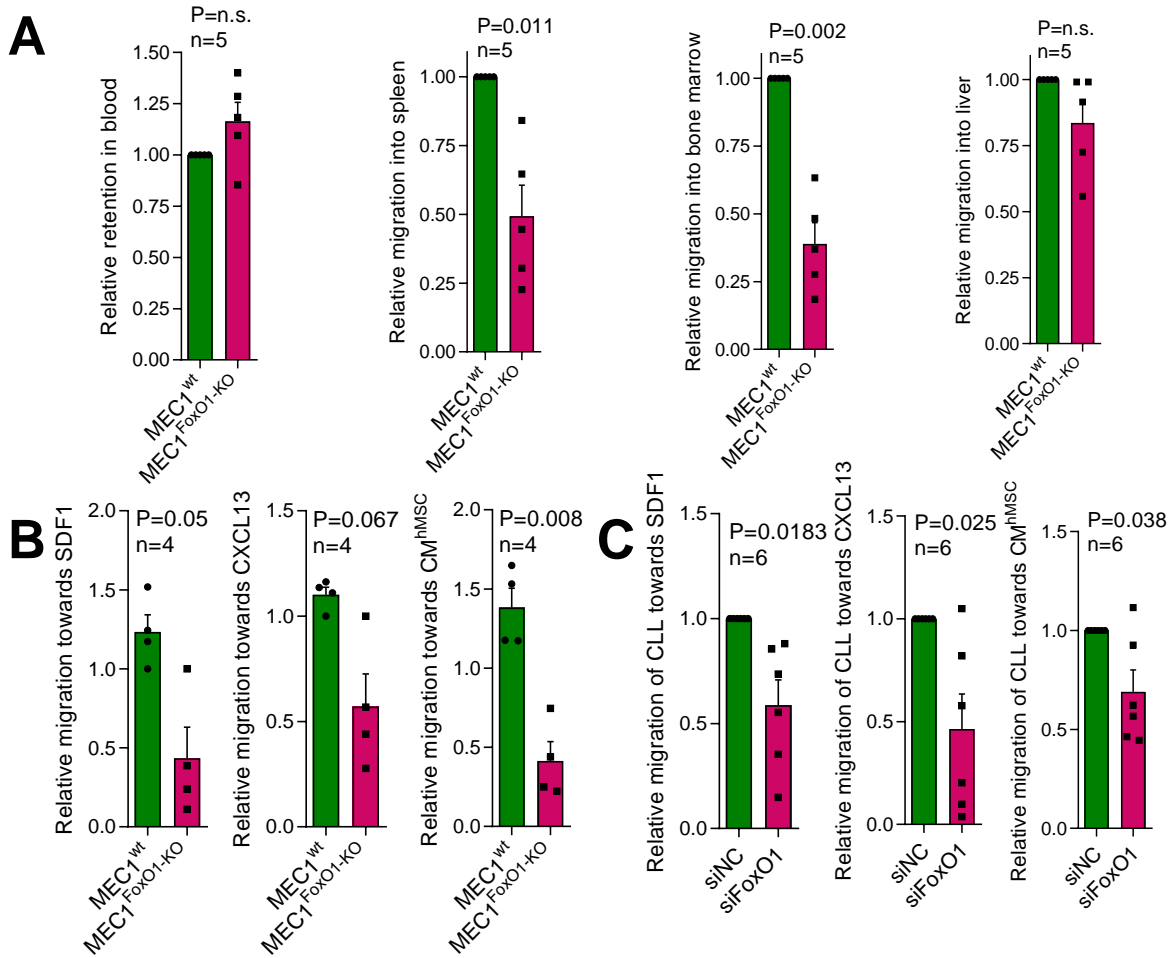

**Supplemental Figure 17. (A)** *In vivo* competitive migration assay of MEC1<sup>wt</sup> vs. MEC1<sup>FoxO1-KO</sup> cells. MEC1<sup>wt</sup> and MEC1<sup>FoxO1-KO</sup> were stained with CFSE or FarRed CellTrace dye, respectively, and incubated overnight. The next day equal numbers of CFSE stained and FarRed stained cells (each  $50 \times 10^6$ ) were mixed to obtain a population with their 1:1 ratio (validated by flow cytometry). A mixture of stained cells was injected into NSG mice via the tail vein (total  $100 \times 10^6$  cells,  $n=5$ ). Mice were sacrificed after 6 hrs, and blood, spleen, bone marrow, and liver were analyzed by flow cytometry for the presence of viable CFSE or FarRed positive cells. The amount of MEC1 cells in each examined site is presented as relative migration between CFSE vs. FarRed positive cells. **(B)** *In vitro* competitive migration assay of MEC1<sup>wt</sup> vs. MEC1<sup>FoxO1-KO</sup>. MEC1<sup>wt</sup> and MEC1<sup>FoxO1-KO</sup> were stained with CFSE or FarRed CellTrace dye, respectively, and incubated overnight. The next day equal numbers of CFSE stained and FarRed stained cells were loaded to transwell. Migration ( $n=4$ ) towards SDF1 (250 ng/ml), or CXCL13 (500 ng/ml), or conditioned media produced by human bone mesenchymal stromal cells (CM<sup>hMSC</sup>) was allowed for 6 hrs, and the ratio of passed cells was assessed by flow cytometry. The number of migrated cells was normalized to the migration of cells applied to transwell without chemokines in the bottom chamber. **(C)** Competitive migration assay of CLL cells after *FoxO1* silencing by siRNA (siFoxO1) compared to cells transfected with control siRNA (siNC). Cells were incubated for 48 hrs and then stained with two different CellTrace dyes and loaded in 1:1 ratio on transwell. Migration ( $n=6$ ) towards SDF1 (100 ng/ml), or CXCL13 (250 ng/ml), or conditioned media produced by human bone mesenchymal stromal cells (CM<sup>hMSC</sup>) was allowed for 6 hrs, and the ratio of migrated cells was assessed by flow cytometry.

**Supplemental Figure 18**

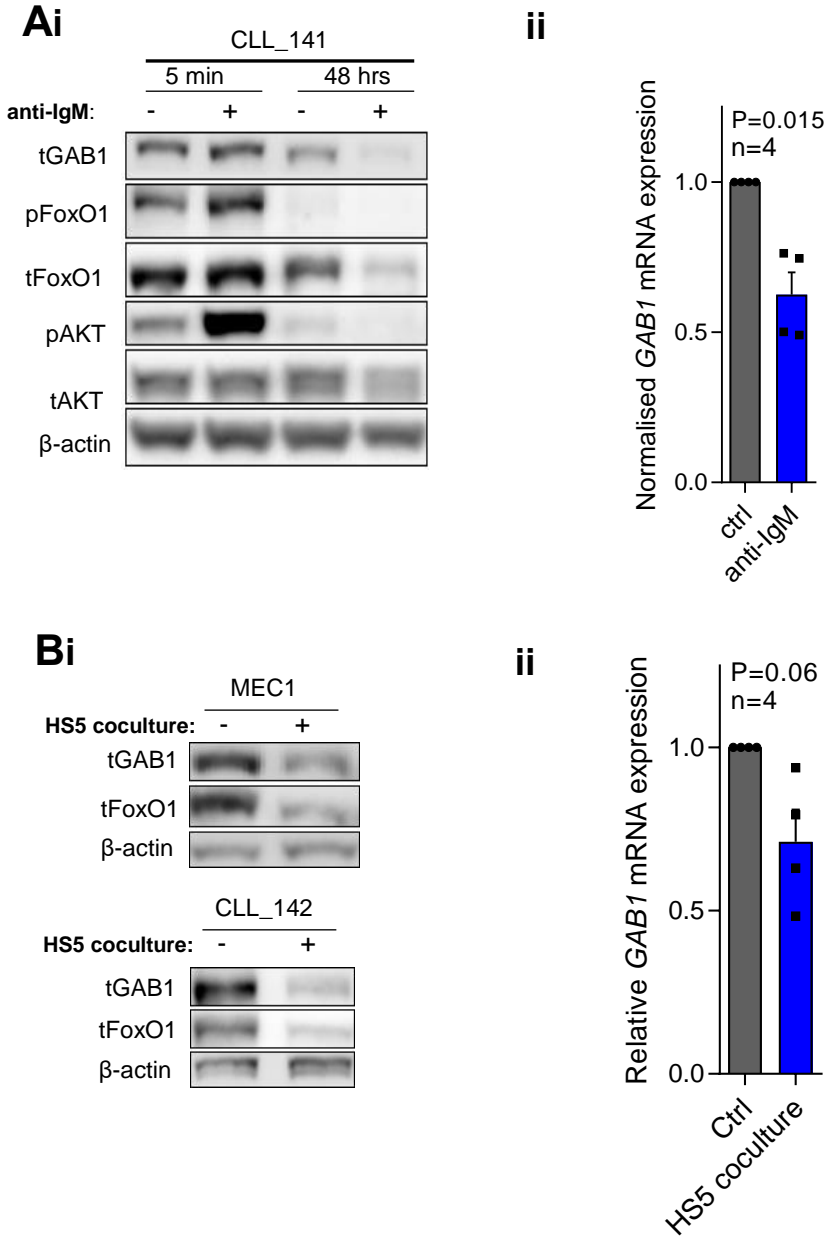

**Supplemental Figure 18. (A) (i)** Representative immunoblot for FoxO1 and GAB1 levels in primary CLL cells stimulated with anti-IgM (10 µg/ml) for 5 min or 48 hrs. **(ii)** GAB1 mRNA expression from CLL cells (n=4) treated with anti-IgM for 48 hrs. Ctrl stands for cells incubated in culture media only. **(B) (i)** Representative immunoblot of GAB1 and FoxO1 protein levels after coculture of MEC1 cells or primary CLL cells with HS5 stromal cells for 48 hrs. Primary CLL cells were seeded on a confluent layer of HS5 cells in an approx. 5:1 ratio (CLL:HS5). After 48 hrs cell suspension was stained with antibody against CD105 (a specific marker of stromal cells) and sorted by FACS (purity > 99,9% of CD19+CD5+ cells). **(ii)** GAB1 mRNA expression after coculture of primary CLL cells (n=4) with HS5 stromal cells for 48 hrs.

**Supplemental Figure 19**

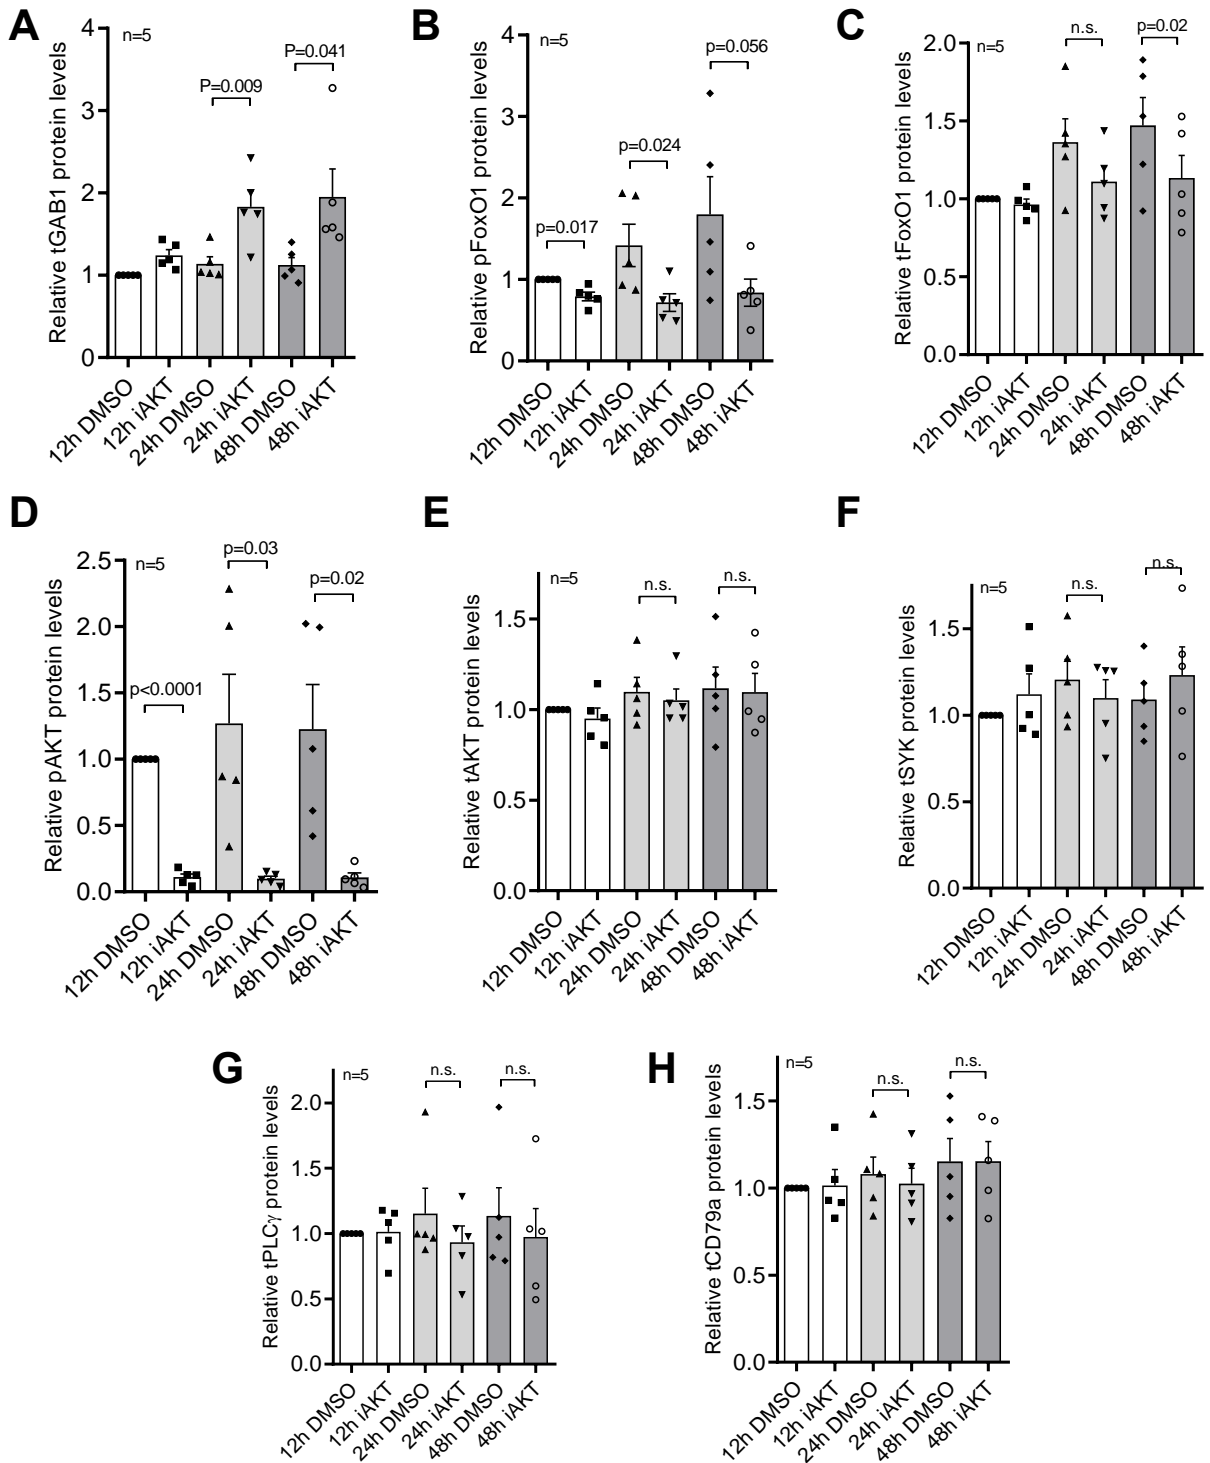

**Supplemental Figure 19.** Densitometric quantification of tGAB1 (**A**), pFoxO1 (**B**), tFoxO1 (**C**), pAKT (**D**), tAKT (**E**), tSYK (**F**), tPLC $\gamma$  (**G**), tCD79a (**H**) and protein levels in MEC1 cells treated with 1  $\mu$ M inhibitor of AKT (iAKT) or vehicle (DMSO) for 12-48 hrs. MEC1 cells were used in this experiment, since primary CLL cells have relatively very low basal AKT phosphorylation levels to be inhibited (supplemental Figure 20).



**Supplemental Figure 20**

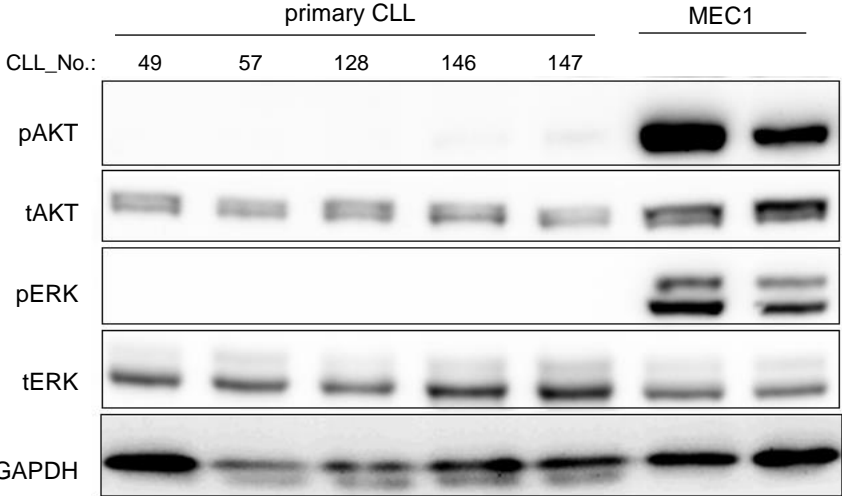

**Supplemental Figure 20.** Representative immunoblot for freshly isolated primary CLL cells and MEC1 cell line (samples from 2 different cultures of MEC1 cells).

Supplemental Figure 21

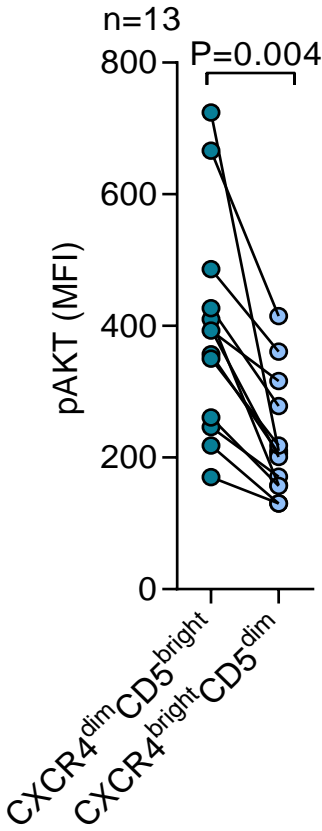

Supplemental figure 21. Intracellular staining of pAKT in CXCR4/CD5 CLL subpopulations.

Supplemental Figure 22

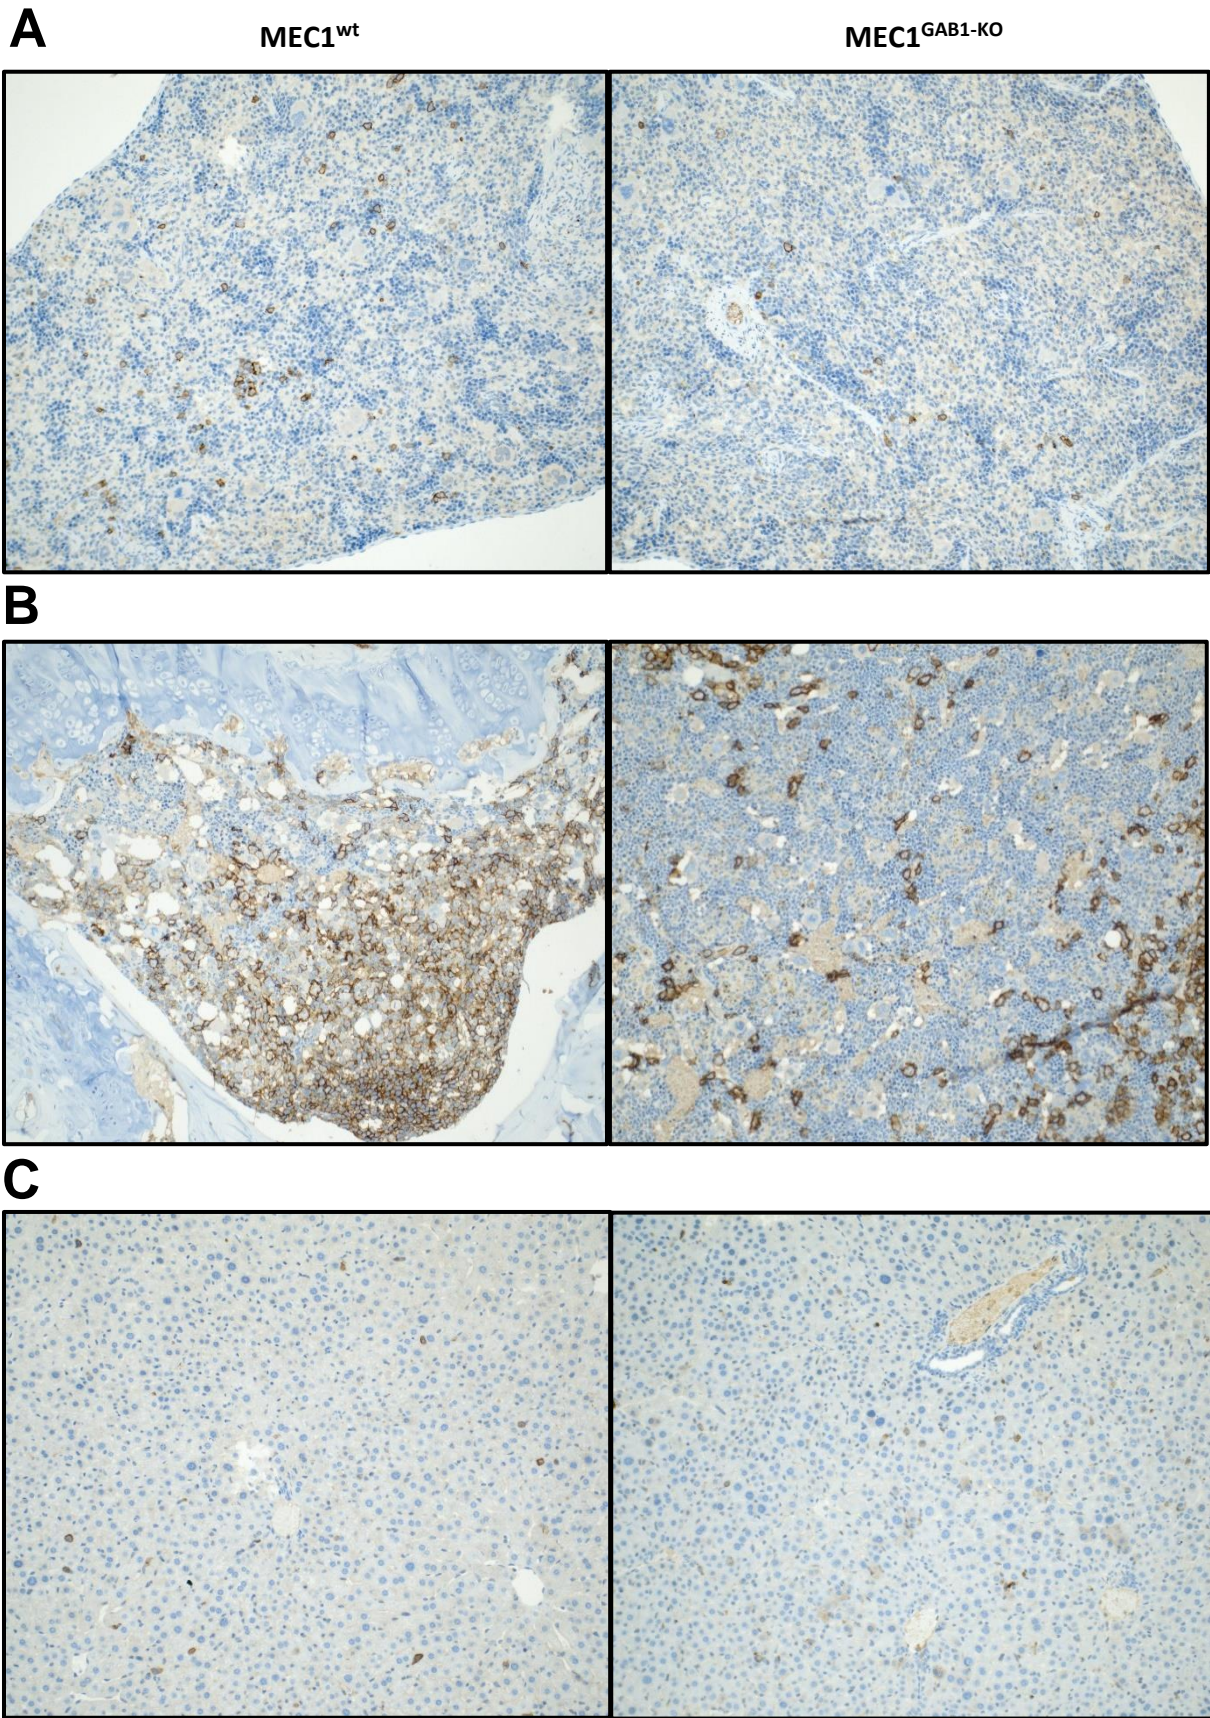

**Supplemental Figure 22.** Histological evaluation of spleen **(A)**, bone marrow **(B)**, and liver **(C)** of NSG mice transplanted with MEC1<sup>wt</sup> (left) or MEC1<sup>GAB1-KO</sup> (right) cells. In this experiment, MEC1<sup>wt</sup> or MEC1<sup>GAB1-KO</sup> cells were transplanted separately to individual NSG mice via a tail vein injection and sacrificed after 3 weeks. Tissue sections were stained with anti-human-CD20 antibody (brown signal) and the post-counterstaining by Bluing reagent (Ventana). The composition of the spleen structure in NSG mice is different from normal mouse spleen and reflects the absence of mature B/T/NK cells in these animals (see Supplemental Fig. 10D for hematoxylin-eosin staining of the spleen). Therefore, the white pulp of the spleen is absent, and the organ is mainly formed by red pulp with a high content of overactive erythron and excessive erythropoiesis (including the presence of megakaryocyte). The migrated MEC1 cells were localized diffusely in the spleen, and there was no difference in tissue localization for GAB1-knockout versus GAB1-wt cells (data not shown).

**Supplemental Figure 23**

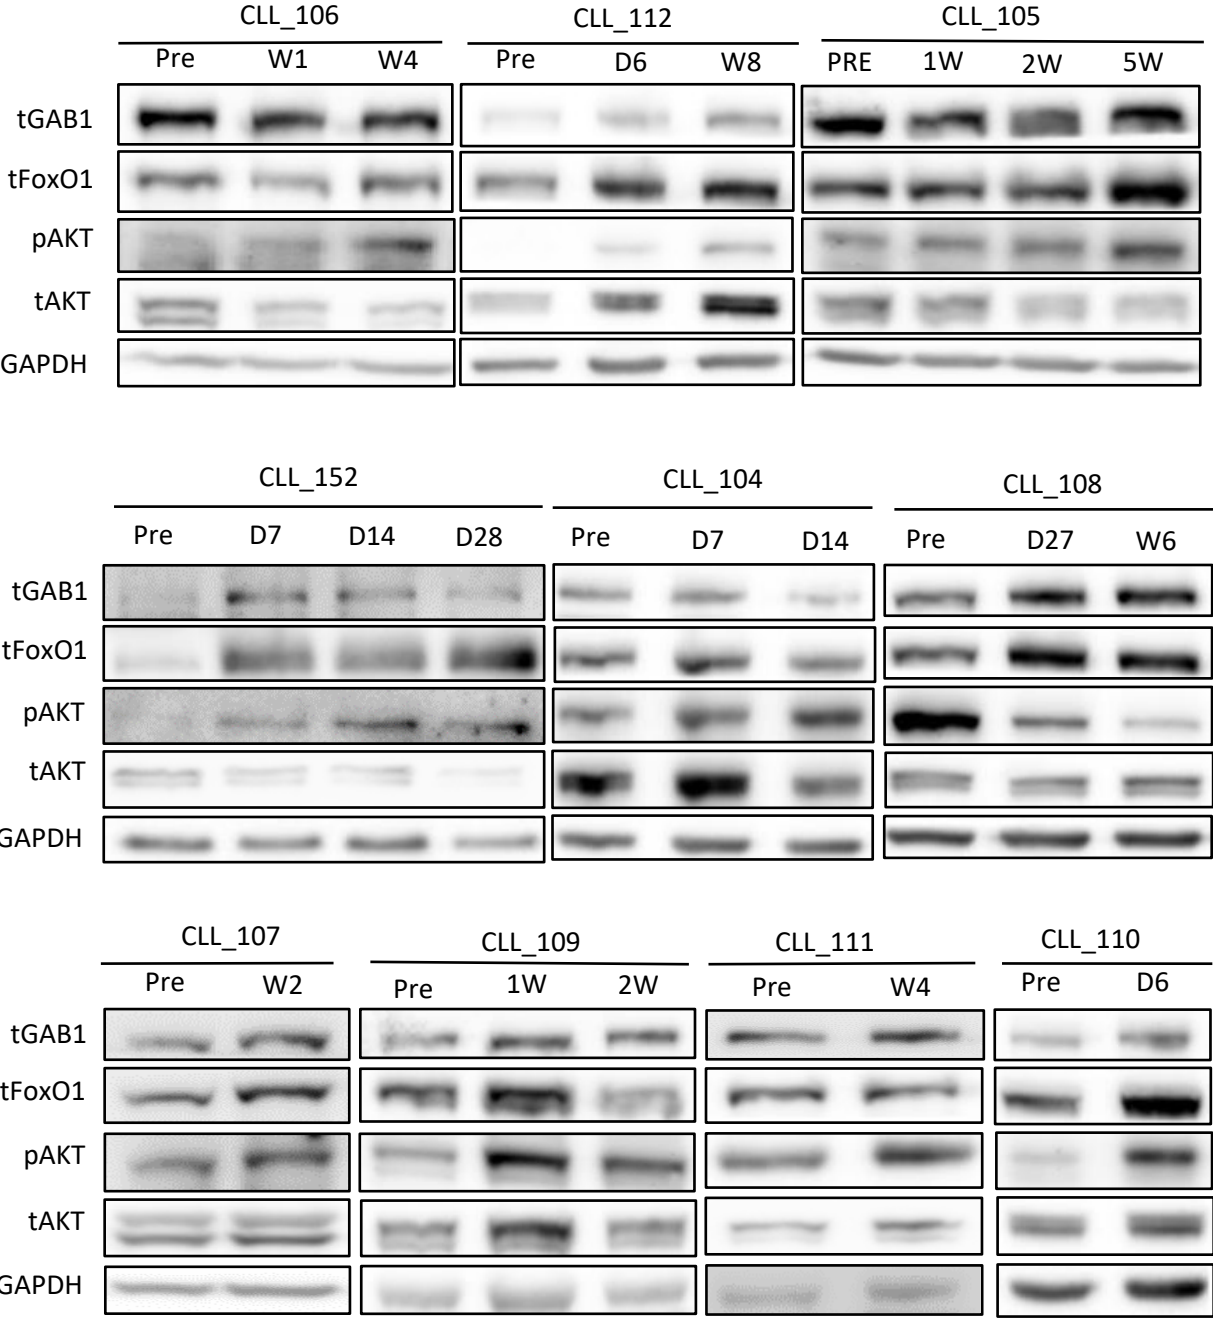

**Supplemental Fig. 23** Additional immunoblots from primary CLL cells isolated from peripheral blood of patients before and during ibrutinib therapy. “Pre” stands for samples isolated immediately before the first administration of ibrutinib, and samples obtained during therapy are indicated by the number of days (D) or weeks (W) on therapy.

**Supplemental Figure 24**

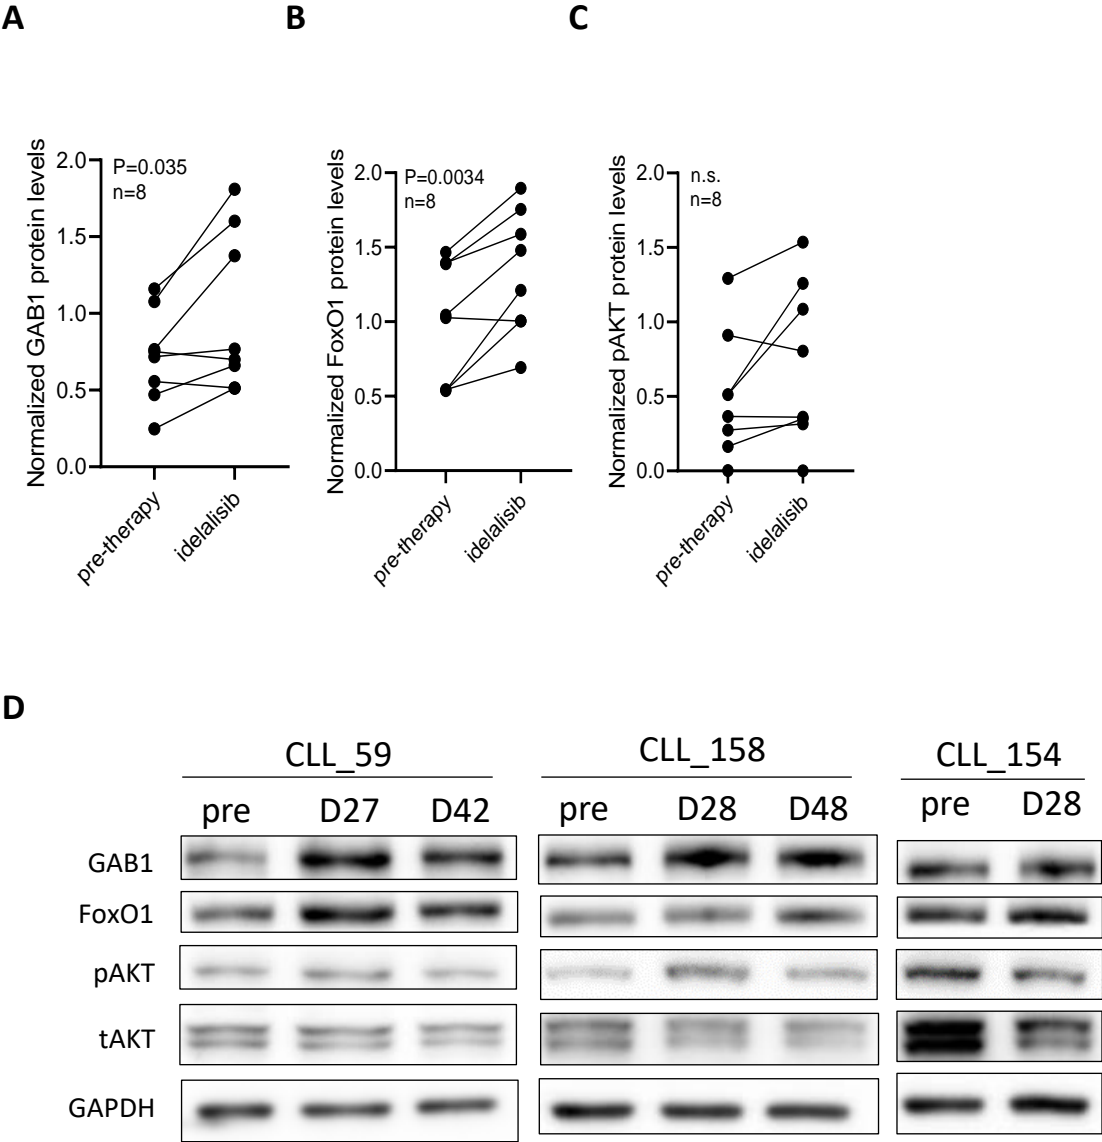

**Supplemental Fig. 24 (A-E)** Densitometric quantification of tGAB1 (A), tFoxO1 (B), pAKT (C) protein levels in primary CLL cells before (pre-therapy) and during idelalisib therapy as a single agent (week 4). The density of each protein band was normalized to endogenous control. (D) Representative immunoblots from primary CLL cells isolated from peripheral blood of patients before (pre) and during idelalisib therapy (D stands for the number of days on therapy).

Supplemental Figure 25

**A**

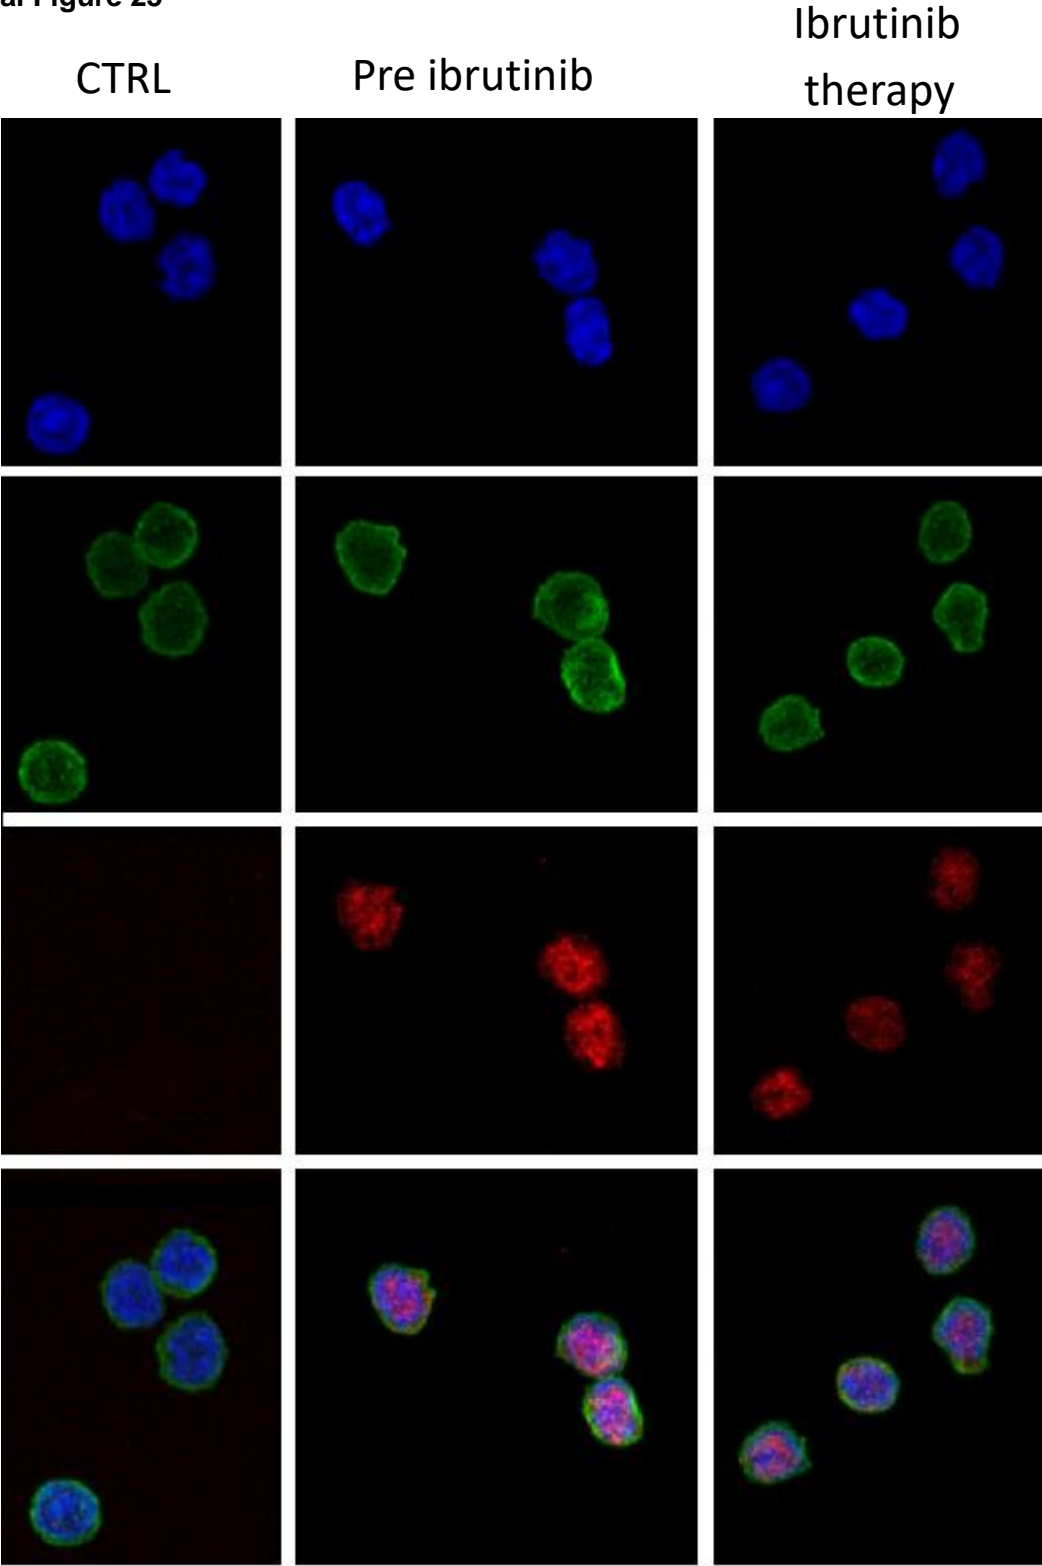

**B**

CTRL

Pre ibrutinib

Ibrutinib  
therapy

DAPI

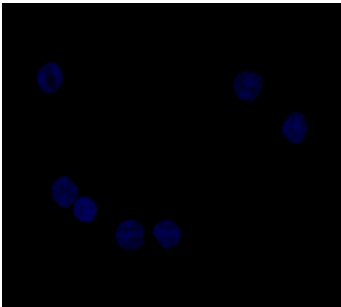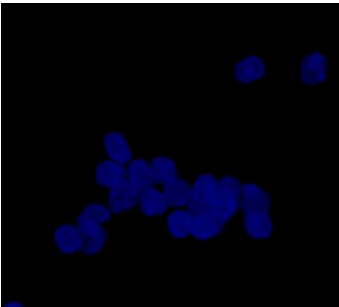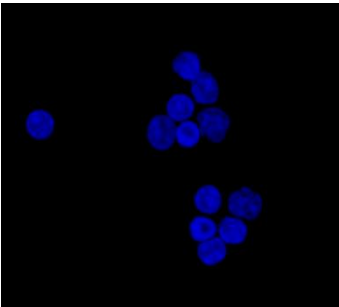

Actin

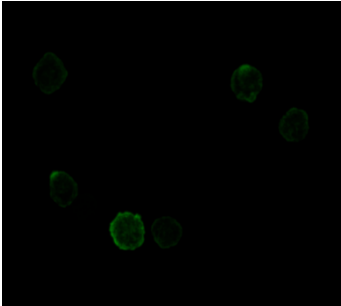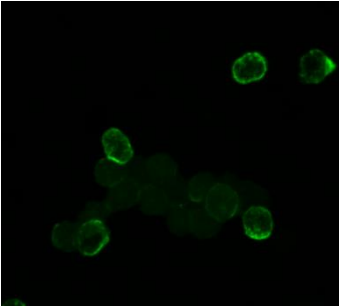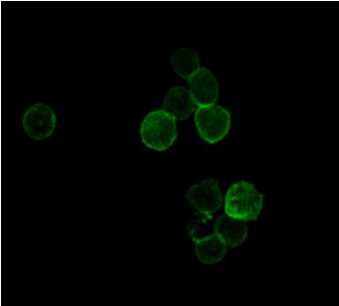

FoxO1

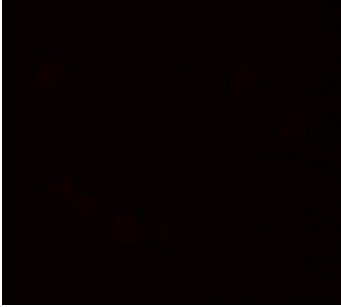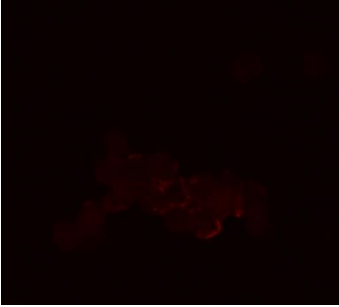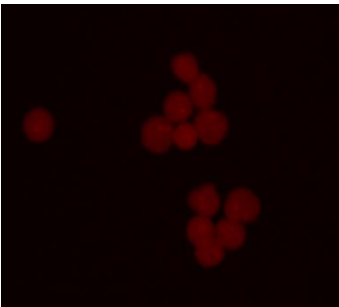

merge

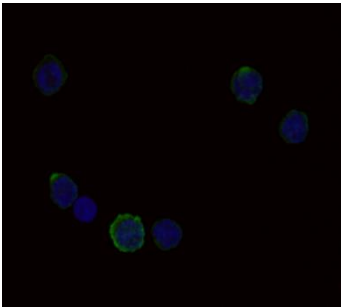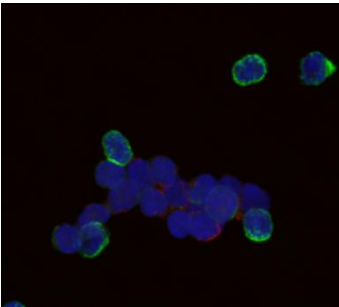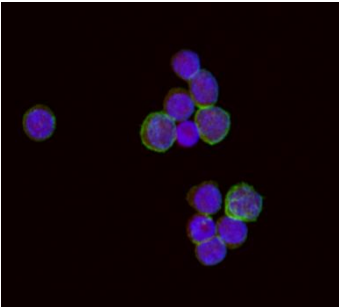



**C**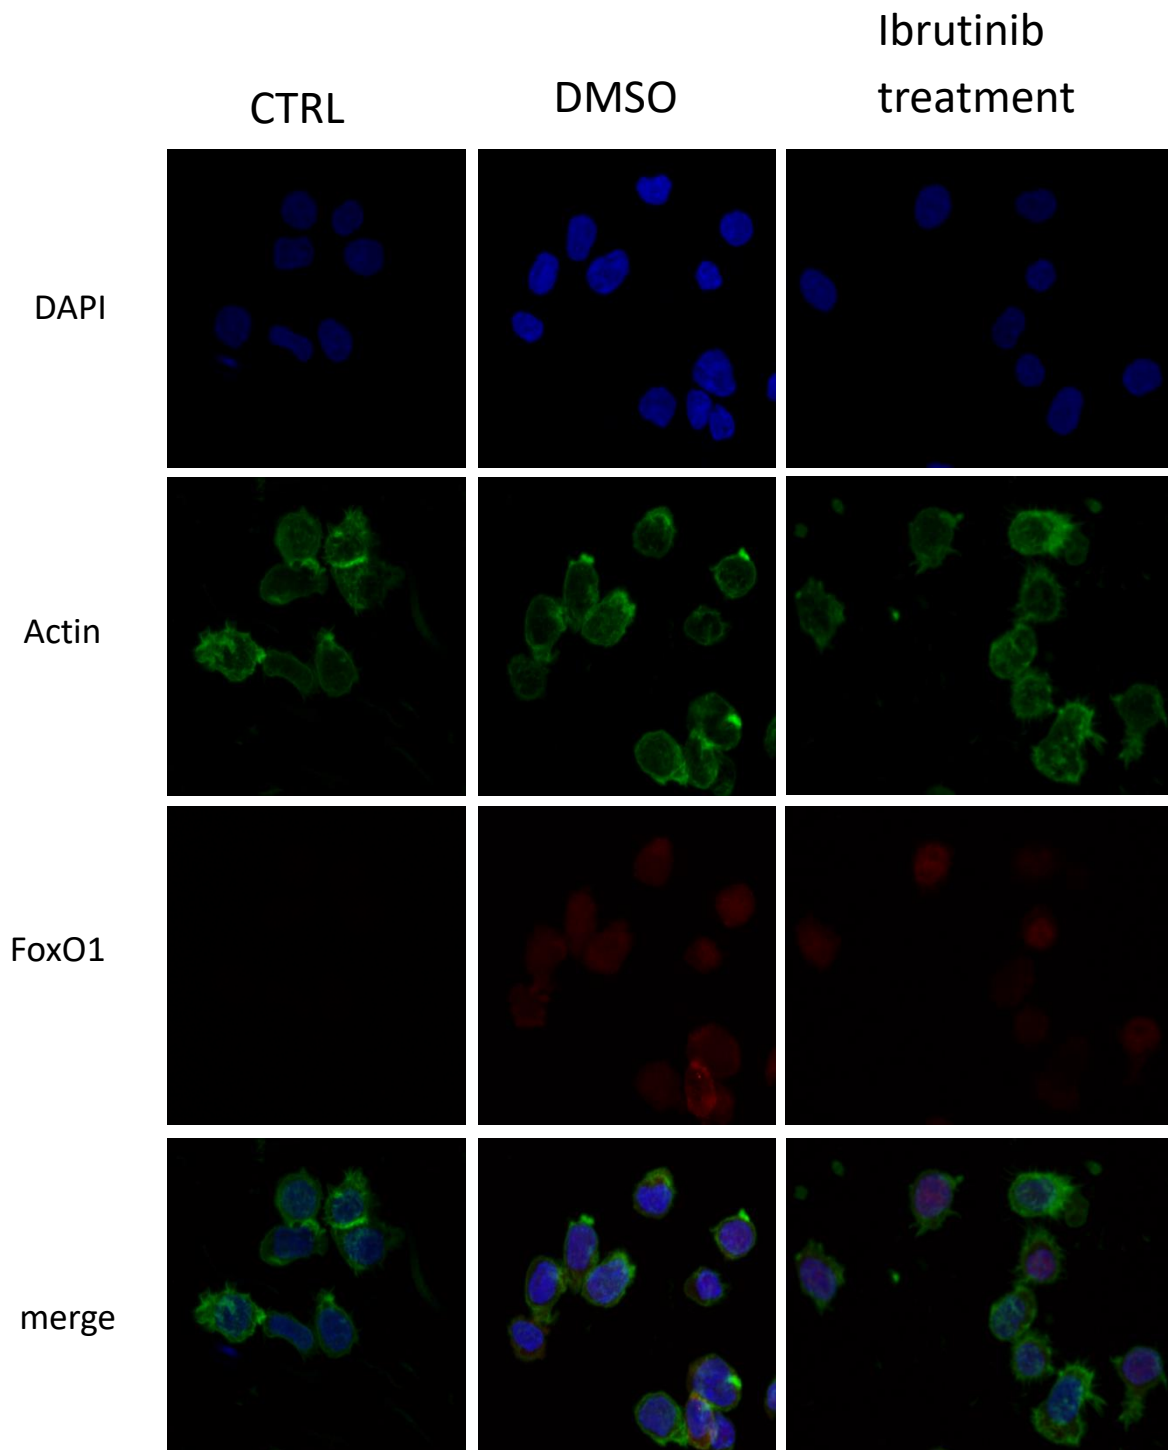

**Supplemental Figure 25. (A-B)** Representative confocal microscopy picture of 2 primary CLL samples isolated from the patient before (pre) and during ibrutinib therapy (**[A]** week 2, **[B]** week 8; for patient characteristic, see sample CLL\_160 and CLL\_112, respectively, Supplemental Tab.1). **(C)** Representative confocal microscopy of MEC1 cells treated with 1  $\mu$ M ibrutinib or with an equal volume of control (DMSO) for 5 days. In control sample (CTRL) no anti-FoxO1 primary antibody was used. Blue staining (DAPI) represents the nucleus, green represents the cytoskeleton (actin), and red staining represents FoxO1.

Supplemental Figure 26

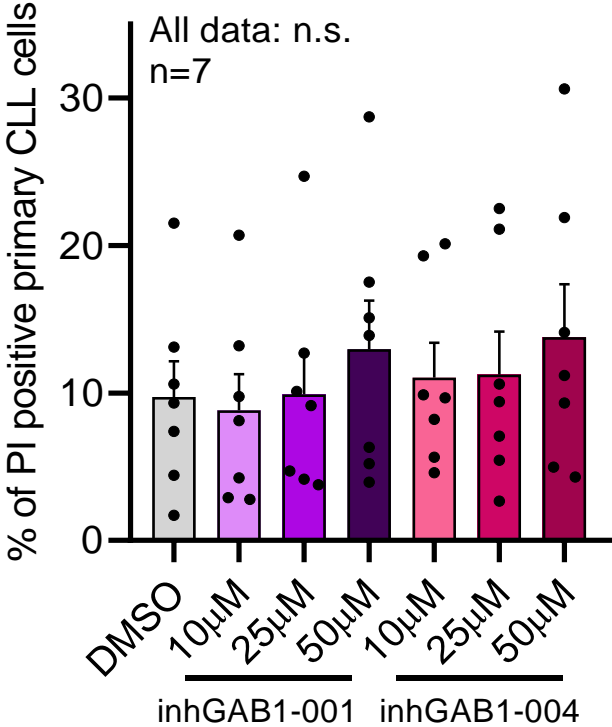

Supplemental Figure 26. Analysis of cell viability in primary CLL cells treated for 6 hrs with different doses of GAB1 inhibitor GAB1-001 or GAB1-004.

Supplemental Figure 27

**A**

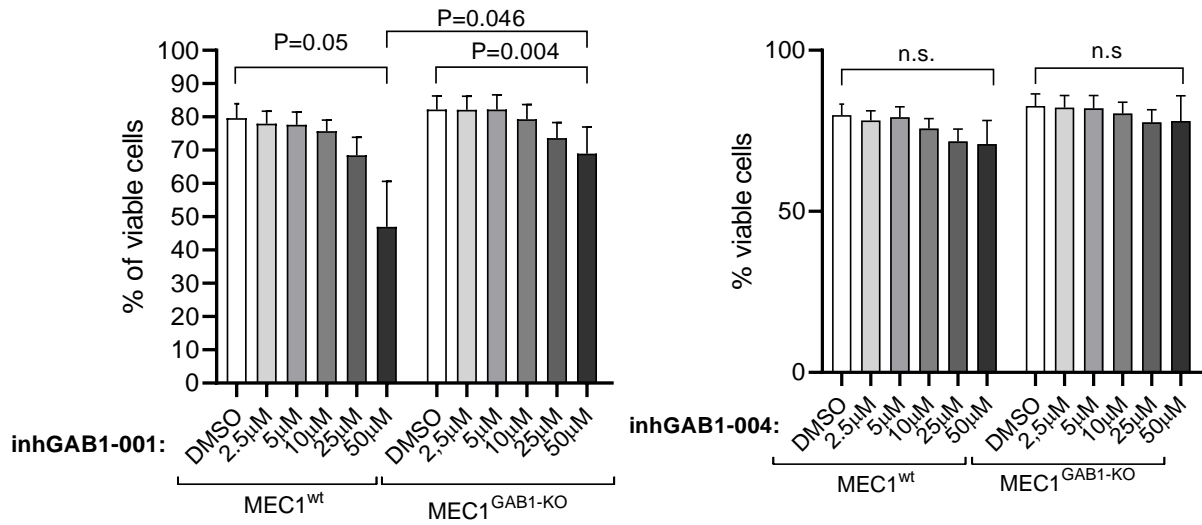

**B**

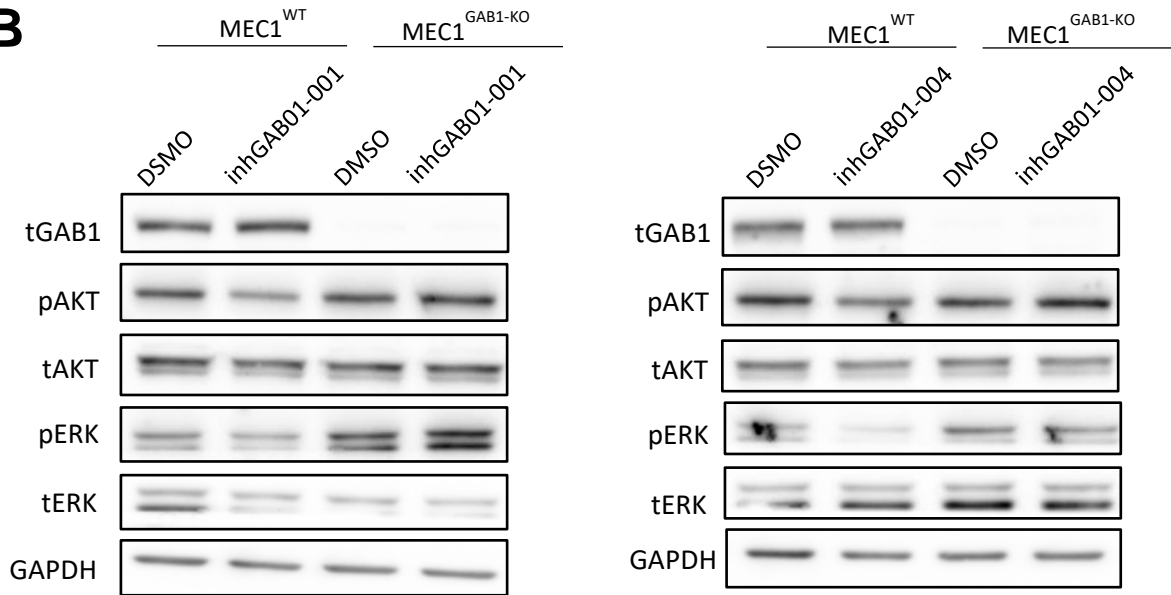

**Supplemental Figure 27. (A)** The effect of various doses (2.5-50 μM) of inhibitor GAB1-001 (*left*) or GAB1-004 (*right*) on the viability of MEC1<sup>wt</sup> and MEC1<sup>GAB1-KO</sup> cells (72 hrs, n=7 replicates). **(B)** Immunoblot for MEC1<sup>WT</sup> and MEC1<sup>GAB1-KO</sup> cells treated for 6 hrs with 50 μM inhibitor GAB1-001 (*left*) or GAB1-004 (*right*).

Supplemental Figure 28

**A**

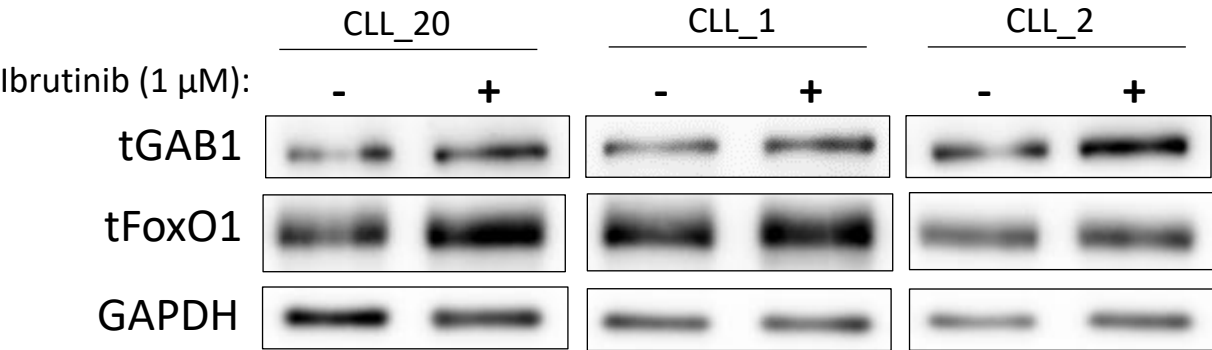

**B**

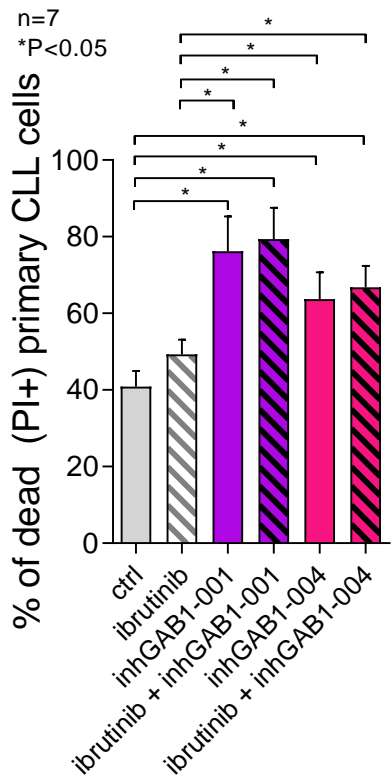

**Supplemental Figure 28. (A)** Representative immunoblot of primary CLL cells treated with 1 μM ibrutinib (+) or equal volume of DMSO (-) for 6 days. Cells were incubated in media containing 5 ng/ml IL4. **(B)** Statistical analysis of primary CLL cells' viability (n=7) after 48 hrs treatment with ibrutinib (1 μM) or two different GAB1 inhibitors (inhGAB1-001 or inhGAB1-004; 25 μM) or their combinations.

Supplemental Figure 29

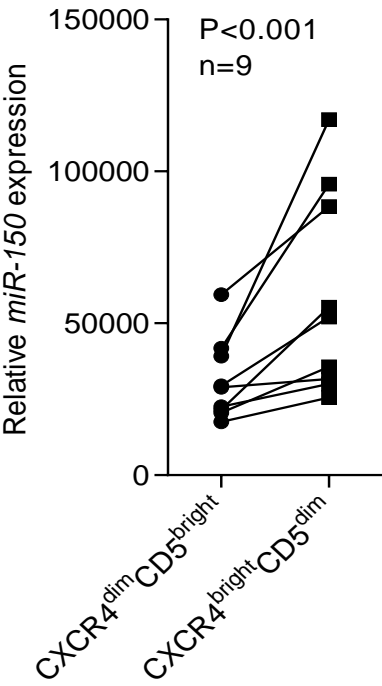

Supplemental Figure 29. The relative expression of *miR-150-5p* in CXCR4/CD5 CLL subpopulations (n=9).

**Supplemental Table 1: Characteristics of CLL patients**

| Patient ID | Sample used in figure                             | Gender | Age at time of diagnosis | Rai stage (at sample collection) | FISH results |              |                |                                    | TP53 mutation status | IGHV status |
|------------|---------------------------------------------------|--------|--------------------------|----------------------------------|--------------|--------------|----------------|------------------------------------|----------------------|-------------|
|            |                                                   |        |                          |                                  | del17p13 (%) | del11q23 (%) | trisomy 12 (%) | del13q14 (%)                       |                      |             |
| CLL 1      | 1A; 1D; 1G; S1; S2; S5; S6; S6; S16; S17; S28A    | F      | 63                       | II B                             | neg          | neg          | neg            | neg                                | wt                   | unmut       |
| CLL 2      | 1A; 1D; 6I; 6J; S1; S2; S5; S26; S28A             | M      | 66                       | IA                               | neg          | pos (95)     | neg            | pos (96)                           | wt                   | unmut       |
| CLL 3      | 1A; 2D; S1; S2; S8                                | M      | 56                       | II B                             | neg          | neg          | neg            | neg                                | wt                   | unmut       |
| CLL 4      | 1A; 2D; S1; S2; S9                                | F      | 54                       | 0A                               | neg          | neg          | neg            | pos (62)                           | wt                   | unmut       |
| CLL 5      | S9                                                | M      | 56                       | II B                             | neg          | neg          | neg            | neg                                | wt                   | unmut       |
| CLL 6      | 1A; S1; S2                                        | M      | 64                       | I A                              | neg          | pos (94)     | neg            | pos (96)                           | wt                   | unmut       |
| CLL 7      | 1A; S1; S2                                        | F      | 68                       | IV                               | neg          | pos (87)     | neg            | pos (10)                           | wt                   | ---         |
| CLL 8      | 1C; 1F; 1G; 3A; 3I; S3; S4; S6; S28               | F      | 59                       | I A                              | neg          | pos (64)     | neg            | pos (97)                           | wt                   | unmut       |
| CLL 9      | 1C; 3A; 3I; S3; S4                                | M      | 74                       | IV A                             | neg          | neg          | neg            | pos (94)                           | mut100               | unmut       |
| CLL 10     | 1C; 3A; 3I; S3; S4                                | F      | 64                       | III B                            | neg          | pos (9)      | neg            | pos (47)                           | wt                   | ---         |
| CLL 11     | 1C; 3A; 3I; S3; S4; S28                           | M      | 71                       | II A                             | neg          | neg          | neg            | neg                                | wt                   | ---         |
| CLL 12     | 1C; 3A; 3I; S3; S4; S28                           | F      | 59                       | III A-B                          | neg          | neg          | neg            | pos (72)                           | wt                   | unmut       |
| CLL 13     | 1C; 3A; 3I; S3; S4; S28                           | F      | 71                       | I A                              | neg          | neg          | neg            | pos (59)                           | wt                   | unmut       |
| CLL 14     | 1C; 3A; 3I; S3; S4; S28                           | M      | 79                       | IIIA                             | neg          | pos (7)      | neg            | neg                                | wt                   | unmut       |
| CLL 15     | 1C; 3A; 3I; S3; S4; S28                           | F      | 62                       | I A                              | neg          | neg          | neg            | pos (7)                            | wt                   | unmut       |
| CLL 16     | 1C; 3A; 3I; S3; S4; S28                           | M      | 70                       | I A                              | neg          | neg          | neg            | pos (99)                           | wt                   | unmut       |
| CLL 17     | 1C; 3A; 3I; S3; S4                                | F      | 65                       | II A                             | neg          | neg          | neg            | pos (95)                           | wt                   | unmut       |
| CLL 18     | 1D; 1G; 1E; 1F; 3F; 3H; 6C; S2; S5; S6; S28       | M      | 58                       | I A                              | neg          | neg          | neg            | 43% cells with monoalelic deletion | wt                   | unmut       |
| CLL 19     | 1D; 1G; 2H; 6D; 6E; 6I; 6J; S5; S6; S6; S19; S28A | M      | 62                       | II A                             | neg          | neg          | neg            | pos (95)                           | wt                   | mut         |
| CLL 20     | 1D; 1G; 3G; 6I; 6J; S5; S6; S11; S12; S28A        | M      | 64                       | I A                              | neg          | neg          | neg            | pos (9)                            | wt                   | ---         |

|        |                              |   |    |       |                 |                       |                |                                             |          |       |
|--------|------------------------------|---|----|-------|-----------------|-----------------------|----------------|---------------------------------------------|----------|-------|
| CLL 21 | 1D; 1G; S2; S5; S6; S6       | M | 73 | III A | neg             | pos (74)              | neg            | neg                                         | wt       | unmut |
| CLL 22 | 1D; 1G; S5; S6; S6           | M | 68 | IV A  | neg             | pos (98)              | neg            | neg                                         | wt       |       |
| CLL 23 | 1D; 6C; S1; S2; S5; S18; S28 | F | 70 | IA    | neg             | pos (95)              | neg            | pos (36)                                    | wt       | mut   |
| CLL 24 | 1E; 2H; 3F; 3H; S19; S21     | F | 77 | IVA   | neg             | neg                   | neg            | 81% cells with monoalelic deletion          | wt       | unmut |
| CLL 25 | 1E; 3F; 3H; S21              | M | 64 | ND    | tetrasomy (14%) | ---                   | ---            | ---                                         | ---      | ---   |
| CLL 26 | 1E; 3F; 3H                   | M | 90 | IVA/B | neg             | pos (34)              | neg            | pos (42)                                    | wt       | ---   |
| CLL 27 | 1E; 3F; 3H                   | M | 58 | IIIA  | neg             | neg                   | neg            | 96% cells with monoalelic deletion          | mut (ND) | unmut |
| CLL 28 | 1E; 3F; 3H                   | M | 68 | IIA   | neg             | pos (97)              | neg            | neg                                         | wt       | unmut |
| CLL 29 | 1E; 3F; 3H                   | M | 52 |       | neg             | neg                   | pos (65)       | neg                                         | wt       | unmut |
| CLL 30 | 1E; 3F; 3H; S21              | F | 71 | ---   | ---             | ---                   | ---            | ---                                         | ---      | ---   |
| CLL 31 | 1E; 3F; 3H                   | M | 46 | IA    | neg             | neg                   | neg            | pos (74)                                    | wt       | mut   |
| CLL 32 | 1E; 3F; 3H                   | F | 56 | IIIB  | neg             | neg                   | neg            | 27% cells with monoalelic deletion          | wt       | unmut |
| CLL 33 | 1E; 3F; 3H; S21              | M | 69 | OA    | neg             | neg                   | neg            | neg                                         | wt       | unmut |
| CLL 34 | 1E; 3F; 3H; S21              | F | 75 | III B | pos (del, 94)   | neg                   | neg            | 91 % cells with bialelic deletion           | mut (77) | mut   |
| CLL 35 | 1E; 3F; 3H                   | M | 64 | OA    | neg             | neg                   | neg            | pos (10)                                    | wt       | mut   |
| CLL 36 | 1E; 3F; 3H; S21              | F | 70 | A     | neg             | neg                   | pos (50)       | neg                                         | ND       | ND    |
| CLL 37 | 1E; 3F; 3H; S21              | F | 75 | IIIB  | pos (13)        | 4 copies of gene (63) | tetrasomy (62) | deletion (11); 4 copies (30); 3 copies (32) | wt       | ---   |
| CLL 38 | 1E; 3F; 3H; S21              | M | 55 | ND    | neg             | pos (98)              | neg            | neg                                         | wt       | unmut |
| CLL 39 | 1E; 3F; 3H                   | M | 67 | OA    | neg             | neg                   | neg            | pos (41)                                    | wt       | mut   |
| CLL 40 | 1E; 3F; 3H; 6C, S28          | M | 78 | IVA   | neg             | pos (99)              | neg            | 99% cells with monoalelic deletion          | wt       | unmut |
| CLL 41 | 1E; 3F; 3H; 6C, S28          | F | 54 | IA    | neg             | neg                   | neg            | 25 % cells with monoalelic deletion         | wt       | mut   |
| CLL 42 | 1E; 3F; 3H; 6D; 6E           | F | 66 | IA    | neg             | neg                   | pos (89)       | neg                                         | wt       | unmut |

|        |                                             |   |    |       |          |          |          |                                     |          |       |
|--------|---------------------------------------------|---|----|-------|----------|----------|----------|-------------------------------------|----------|-------|
| CLL 43 | 1E; 3F; 3H; 6I; 6J; S2                      | M | 30 | IIB   | neg      | neg      | neg      | neg                                 | wt       | unmut |
| CLL 44 | 1G; 3D; 6C; 6D; 6E; S6; S28                 | F | 52 | IA    | neg      | neg      | neg      | 97% cells with<br>bialelic deletion | wt       | mut   |
| CLL 45 | 1G; 3G; S6                                  | M | 76 | IVB   | neg      | pos (66) | neg      | pos (75)                            | mut      | ND    |
| CLL 46 | 1G; S8; S6; S11; S12                        | M | 73 | IIA   | neg      | neg?     | neg      | ---                                 | wt       | unmut |
| CLL 47 | 2D; 2G; 4F; 6D; 6E; 6I; 6J; S9;<br>S18; S26 | F | 54 | IIIA  | neg      | neg      | pos (85) | neg                                 | wt       | ---   |
| CLL 48 | 2D; S9                                      | F | 68 | IV B  | neg      | pos (92) | neg      | pos (88)                            | wt       | mut   |
| CLL 49 | 2D; S9; S20                                 | M | 70 | IIB   | neg      | neg      | neg      | pos (8)                             | wt       | mut   |
| CLL 50 | 2H                                          | F | 76 | ND    | neg      | neg      | neg      | pos (92)                            | mut (85) | unmut |
| CLL 51 | 2H                                          | M | 66 | III A | neg      | pos (28) | neg      | pos (96)                            | wt       | unmut |
| CLL 52 | 2H                                          | F | 73 | II A  | neg      | neg      | neg      | neg                                 | wt       | unmut |
| CLL 53 | 2H; 6I; 6J; S16; S17; S19                   | M | 73 | ---   | neg      | neg      | neg      | pos (95)                            | wt       | ---   |
| CLL 54 | 2H; 6I; 6J; S16; S17; S19; S26              | F | 73 | I A   | neg      | neg      | pos (20) | pos (69)                            | wt       | mut   |
| CLL 55 | 2H; 6I; 6J; S17; S19; S26                   | F | 75 | 0A    | neg      | neg      | neg      | neg                                 | wt       | mut   |
| CLL 56 | 2H; S19                                     | F | 61 | I A   | neg      | neg      | neg      | pos (46)                            | wt       | mut   |
| CLL 57 | 2H; S20                                     | M | 69 | IV    | neg      | neg      | neg      | pos (6)                             | wt       | unmut |
| CLL 58 | 3D                                          | F | 62 | 1A    | neg      | neg      | neg      | pos (81)                            | wt       | mut   |
| CLL 59 | 3D; 6A; 6B; S16; S17; S24; S26              | F | 59 | ---   | neg      | pos (93) | neg      | neg                                 | wt       | unmut |
| CLL 60 | 3E                                          | F | 60 | 0     | neg      | neg      | neg      | pos (85)                            | wt (10)  | mut   |
| CLL 61 | 3E                                          | F | 67 | 0A    | pos (62) | neg      | neg      | pos (71)                            | mut (63) | unmut |
| CLL 62 | 3E                                          | M | 59 | IIA   | neg      | neg      | neg      | neg                                 | wt       | unmut |
| CLL 63 | 3E                                          | M | 50 | IIB   | neg      | pos (95) | neg      | pos (80)                            | wt       | unmut |
| CLL 64 | 3E                                          | F | 61 | IIIA  | pos (98) | neg      | neg      | neg                                 | mut (49) | unmut |
| CLL 65 | 3E                                          | M | 56 | IIIA  | pos (84) | neg      | neg      | pos (86)                            | mut (75) | unmut |
| CLL 66 | 3E                                          | M | 67 | III   | pos (93) | neg      | neg      | neg                                 | wt       | unmut |
| CLL 67 | 3E                                          | F | 58 | IB    | pos (47) | neg      | neg      | pos (95)                            | mut (95) | mut   |
| CLL 68 | 3E                                          | M | 67 | IVA   | neg      | neg      | neg      | pos (99)                            | mut (48) | unmut |
| CLL 69 | 3E                                          | M | 76 | IVB   | pos (63) | neg      | neg      | pos (62)                            | mut (95) | unmut |



|        |    |   |    |        |          |           |          |          |          |       |
|--------|----|---|----|--------|----------|-----------|----------|----------|----------|-------|
| CLL 70 | 3E | F | 57 | II     | neg      | neg       | neg      | neg      | mut (44) | unmut |
| CLL 71 | 3E | F | 63 | III    | neg      | neg       | neg      | neg      | wt       | unmut |
| CLL 72 | 3E | M | 58 | IIA    | pos (97) | neg       | neg      | pos (18) | mut (91) | unmut |
| CLL 73 | 3E | M | 62 | IIB    | neg      | neg       | neg      | neg      | wt       | unmut |
| CLL 74 | 3E | F | 67 | I      | neg      | neg       | neg      | pos (98) | wt       | mut   |
| CLL 75 | 3E | M | 66 | 0      | neg      | neg       | neg      | neg      | wt       | unmut |
| CLL 76 | 3E | M | 63 | IA-B   | neg      | neg       | pos (81) | neg      | wt       | unmut |
| CLL 77 | 3E | F | 56 | IVA    | neg      | neg       | neg      | pos (15) | wt       | unmut |
| CLL 78 | 3E | F | 56 | N/A    | pos (66) | neg       | neg      | pos (94) | mut (47) | mut   |
| CLL 79 | 3E | M | 62 | IV     | neg      | pos (100) | pos (ND) | neg      | mut (89) | unmut |
| CLL 80 | 3E | F | 68 | III    | neg      | pos (96)  | neg      | pos (49) | wt       | unmut |
| CLL 81 | 3E | F | 57 | II     | neg      | pos (93)  | neg      | pos (63) | wt       | unmut |
| CLL 82 | 3E | M | 60 | II B   | neg      | pos (98)  | neg      | pos (99) | wt       | unmut |
| CLL 83 | 3E | M | 54 | IVA    | neg      | neg       | neg      | neg      | wt       | unmut |
| CLL 84 | 3E | M | 67 | IIA    | pos (93) | neg       | pos (76) | pos (97) | mut (46) | mut   |
| CLL 85 | 3E | M | 72 | IVA-B  | neg      | neg       | neg      | neg      | del (82) | ---   |
| CLL 86 | 3E | F | 56 | III    | neg      | neg       | pos (88) | pos (90) | mut (67) | mut   |
| CLL 87 | 3E | F | 54 | IV     | neg      | neg       | neg      | pos (62) | wt       | unmut |
| CLL 88 | 3E | M | 49 | 0      | neg      | neg       | neg      | pos (96) | wt       | mut   |
| CLL 89 | 3E | M | 65 | IV     | neg      | pos (88)  | neg      | neg      | wt       | mut   |
| CLL 90 | 3E | M | 47 | IVB    | pos (72) | pos (38)  | pos (35) | pos (35) | mut (90) | unmut |
| CLL 91 | 3E | M | 77 | III    | pos (9)  | neg       | neg      | pos (92) | mut (54) | unmut |
| CLL 92 | 3E | M | 38 | IIA    | pos (88) | pos (11)  | neg      | pos (35) | mut (15) | unmut |
| CLL 93 | 3E | M | 45 | IV     | neg      | neg       | neg      | neg      | mut (22) | mut   |
| CLL 94 | 3E | M | 55 | III    | neg      | neg       | pos (28) | neg      | mut (46) | unmut |
| CLL 95 | 3E | M | 75 | III-IV | neg      | pos (90)  | neg      | neg      | wt       | unmut |
| CLL 96 | 3E | M | 38 | I      | neg      | pos (99)  | neg      | pos (50) | wt       | unmut |
| CLL 97 | 3E | F | 59 | IIB    | neg      | neg       | neg      | pos (21) | mut (99) | unmut |
| CLL 98 | 3E | M | 43 | I      | neg      | pos (15)  | neg      | neg      | wt       | unmut |

|         |                      |   |    |       |            |            |          |                          |          |       |
|---------|----------------------|---|----|-------|------------|------------|----------|--------------------------|----------|-------|
| CLL 99  | 3E                   | F | 58 | IIIA  | neg        | neg        | neg      | neg                      | wt       | unmut |
| CLL 100 | 3E                   | M | 64 | IVA-B | neg        | neg        | neg      | neg                      | wt       | unmut |
| CLL 101 | 4A; S12              | F | 75 | ---   | neg        | neg        | neg      | mut (93)                 | wt       | mut   |
| CLL 102 | 5Di; 5Dii            | M | 47 | IB    | pos        | neg        | neg      | neg                      | wt       | unmut |
| CLL 103 | 1E; 3E; 3F; 3H; 5Dii | M | 39 | IVB   | pos (12)   | pos (85)   | neg      | pos (15)                 | mut (15) | unmut |
| CLL 104 | 5Dii; 5E; S23        | M | 59 | IVB   | neg        | pos (80)   | neg      | pos (83)                 | wt       | unmut |
| CLL 105 | 5Dii; 5E; S23        | M | 43 | ND    | neg        | pos (96)   | pos (80) | neg                      | wt       | unmut |
| CLL 106 | 5Dii; 5E; S23        | M | 48 | IVB   | neg        | neg        | neg      | pos (85)                 | wt       | unmut |
| CLL 107 | 5Dii; 6B; S11; S23   | M | 65 | IA    | neg        | neg        | pos (86) | neg                      | wt       | unmut |
| CLL 108 | 5Dii; S23            | M | 51 | IVA   | neg        | neg        | neg      | neg                      | wt       | unmut |
| CLL 109 | 5Dii; S23            | F | 64 | ---   | neg        | neg        | neg      | pos (8)                  | wt       | mut   |
| CLL 110 | 5Dii; S23            | M | 71 | IVB   | pos (85)   | pos (15)   | neg      | neg                      | mut (95) | unmut |
| CLL 111 | 5Dii; S23            | M | 67 | IA    | neg        | pos (86)   | neg      | pos (11)                 | wt       | unmut |
| CLL 112 | 5Dii; S23; S25       | M | 58 | IIB   | neg        | neg        | neg      | neg                      | wt       | unmut |
| CLL 113 | 5E                   | M | 34 | I     | pos (16)   | neg        | neg      | neg                      | ND       | mut   |
| CLL 114 | 5E                   | F | 51 | IV    | neg        | neg        | pos (52) | neg                      | ND       | unmut |
| CLL 115 | 5E                   | M | 57 | IV    | pos (60.5) | neg        | neg      | pos (96)                 | mut      | mut   |
| CLL 116 | 5E                   | M | 75 | I     | neg        | neg        | neg      | pos (78.5)               | ND       | mut   |
| CLL 117 | 5E                   | M | 56 | I     | pos (35.5) | neg        | neg      | pos (4.5)                | mut      | unmut |
| CLL 118 | 5E                   | F | 67 | IV    | pos (93.5) | pos (93.5) | neg      | neg                      | ND       | unmut |
| CLL 119 | 5E                   | M | 54 | IA    | neg        | pos (60)   | neg      | pos (54)                 | wt       | unmut |
| CLL 120 | 5E                   | F | 53 | IIIA  | pos (8)    | neg        | neg      | neg                      | wt       | unmut |
| CLL 121 | 6B                   | M | 66 | IA    | neg        | neg        | pos (77) | neg                      | wt       | unmut |
| CLL 122 | 6B                   | M | 64 | IA    | neg        | neg        | pos (81) | neg                      | wt       | unmut |
| CLL 123 | 6B                   | M | 64 | IV-A  | neg        | neg        | neg      | neg                      | wt       | ND    |
| CLL 124 | 6C; S28              | M | 72 | III A | neg        | pos (0.7)  | neg      | 73 % monoalelic deletion | wt       | unmut |

|         |                           |   |    |       |     |          |            |          |          |                 |
|---------|---------------------------|---|----|-------|-----|----------|------------|----------|----------|-----------------|
| CLL 125 | 6C; S28                   | F | 54 | IIIB  | neg | neg      | pos (0.74) | neg      | wt       | biclonal /unmut |
| CLL 126 | 6D; 6E                    | M | 51 | 0A    | neg | neg      | pos (82)   | neg      | wt       | unmut           |
| CLL 127 | 6D; 6E; 6I; 6J; S18       | F | 46 | IVA-B | neg | neg      | neg        | pos (89) | wt       | mut             |
| CLL 128 | 6G; 6F; S11; S20          | F | 79 | IA-B  | neg | neg      | neg        | pos (8)  | wt       | mut             |
| CLL 129 | 6I; 6J; S26               | F | 60 | II B  | neg | pos (16) | neg        | neg      | wt       | unmut           |
| CLL 130 | 6I; 6J                    | F | 72 | III A | neg | neg      | neg        | pos (52) | wt       | unmut           |
| CLL 131 | 6I; 6J                    | M | 87 | IV B  | --- | ---      | ---        | ---      | ---      | ---             |
| CLL 132 | 6I; 6J; S2                | M | 67 | III B | neg | neg      | neg        | neg      | ---      | mut             |
| CLL 133 | 6I; 6J; S2; S12; S16; S26 | M | 77 | I A   | neg | neg      | neg        | pos (9)  | wt       | ---             |
| CLL 134 | S10                       | M | 76 | 0A    | neg | neg      | neg        | pos (20) | wt       | ---             |
| CLL 135 | S10                       | M | 61 | IIIB  | neg | pos (44) | neg        | pos (9)  | wt       | unmut           |
| CLL 136 | S10                       | M | 71 | IV B  | neg | pos (73) | neg        | neg      | mut      | unmut           |
| CLL 137 | S10                       | F | 66 | IIIB  | neg | pos (70) | neg        | neg      | wt       | unmut           |
| CLL 138 | S11                       | F | 80 | IIIA  | neg | neg      | pos (63)   | neg      | wt       | ---             |
| CLL 139 | S11; S12                  | F | 60 | IIB   | neg | pos (95) | neg        | pos (8)  | wt       | unmut           |
| CLL 140 | S12                       | F | 55 | 0A    | neg | neg      | neg        | mut (60) | wt       | mut             |
| CLL 141 | S18                       | F | 73 | IVA   | neg | neg      | pos (70)   | neg      | wt       | ---             |
| CLL 142 | S18                       | F | 57 | 0A    | neg | neg      | neg        | pos (45) | mut (40) | mut             |
| CLL 143 | S18                       | M | 83 | ---   | neg | neg      | pos (78)   | neg      | wt       | ---             |
| CLL 144 | S18                       | F | 74 | IB    | neg | neg      | pos (80)   | neg      | wt       | ---             |
| CLL 145 | S18                       | M | 70 | IVA   | neg | pos (52) | neg        | neg      | mut (35) | unmut           |
| CLL 146 | S20                       | M | 69 | IA    | neg | neg      | pos (81)   | neg      | wt       | unmut           |
| CLL 147 | S20                       | M | 68 | IIB   | neg | neg      | pos (67)   | pos (66) | wt       | mut             |
| CLL 148 | S21                       | M | 75 | IIB   | neg | neg      | neg        | neg      | wt       | unmut           |
| CLL 149 | S21                       | F | 64 | IA    | neg | neg      | neg        | neg      | wt       | unmut           |
| CLL 150 | S21                       | M | 71 | IIA   | neg | neg      | neg        | neg      | wt       | mut             |
| CLL 151 | S21                       | F | 69 | IIA   | neg | neg      | pos (72)   | pos (61) | wt       | mut             |
| CLL 152 | S23                       | M | 64 | III B | neg | neg      | neg        | neg      | wt       | unmut           |

|         |     |   |     |       |     |          |          |          |                       |       |
|---------|-----|---|-----|-------|-----|----------|----------|----------|-----------------------|-------|
| CLL 153 | S24 | F | 50  | IV A  | neg | pos (49) | neg      | neg      | mut                   | ---   |
| CLL 154 | S24 | F | 74  | ---   | neg | neg      | pos (78) | neg      | wt                    | ---   |
| CLL 155 | S24 | M | 61  | IV A  | neg | pos (86) | neg      | neg      | wt                    | unmut |
| CLL 156 | S24 | M | --- | ---   | neg | neg      | neg      | pos (94) | wt                    | unmut |
| CLL 157 | S24 | M | --- | ---   | neg | pos (96) | neg      | pos (94) | wt                    | mut   |
| CLL 158 | S24 | F | 63  | IV A  | neg | neg      | neg      | pos (55) | mut                   | ---   |
| CLL 159 | S24 | F | 82  | II A  | neg | neg      | neg      | pos (13) | mut (22)              | ---   |
| CLL 160 | S25 | M | 34  | IA    | neg | pos (74) | neg      | pos (15) | minor<br>mut<br>(2.5) | unmut |
| CLL 161 | S2  | M | 80  | ---   | neg | neg      | neg      | neg      | wt                    | unmut |
| CLL 162 | S29 | M | 69  | IV B  | neg | pos (91) | neg      | pos (96) | wt                    | unmut |
| CLL 163 | S29 | M | 68  | III B | neg | neg      | neg      | pos (98) | wt                    | unmut |

**Supplemental Table 2: List of top differentially expressed genes in CXCR4/CD5 subpopulations (top 30 upregulated and top 30 downregulated mRNAs)**

| Gene ID         | Gene name           | Base Mean<br>(reads per million) | Fold Change<br>(log2) * | adjusted<br>P-value |
|-----------------|---------------------|----------------------------------|-------------------------|---------------------|
| ENSG00000118432 | CNR1                | 1722.72                          | 2.39                    | 2.80E-16            |
| ENSG00000171246 | NPTX1               | 1555.61                          | 2.21                    | 1.15E-15            |
| ENSG00000135116 | HRK                 | 1111.617                         | 2.05                    | 1.28E-15            |
| ENSG00000112182 | BACH2               | 10947.54                         | 2.05                    | 2.99E-44            |
| ENSG00000111266 | DUSP16              | 219.72                           | 2.01                    | 8.96E-18            |
| ENSG00000069188 | SDK2                | 1503.15                          | 1.91                    | 1.39E-12            |
| ENSG00000065534 | MYLK                | 2140.31                          | 1.91                    | 8.31E-18            |
| ENSG00000179088 | C12orf42            | 256.13                           | 1.87                    | 2.05E-17            |
| ENSG00000166949 | SMAD3               | 289.63                           | 1.81                    | 4.59E-14            |
| ENSG00000131941 | RHPN2               | 276.96                           | 1.81                    | 3.23E-28            |
| ENSG00000152953 | STK32B              | 462.16                           | 1.73                    | 2.35E-06            |
| ENSG00000186350 | RXRA                | 2740.28                          | 1.72                    | 1.55E-11            |
| ENSG00000099958 | DERL3               | 1749.33                          | 1.71                    | 2.61E-14            |
| ENSG00000102053 | ZC3H12B             | 895.52                           | 1.63                    | 1.08E-37            |
| ENSG00000169762 | TAPT1               | 2568.98                          | 1.62                    | 6.45E-12            |
| ENSG00000184897 | H1FX                | 7058.84                          | 1.60                    | 3.21E-37            |
| ENSG00000204569 | PPP1R10             | 2626.45                          | 1.59                    | 2.89E-28            |
| ENSG00000135299 | ANKRD6              | 273.52                           | 1.55                    | 5.14E-33            |
| ENSG00000172794 | RAB37               | 1088.77                          | 1.48                    | 3.46E-17            |
| ENSG00000165029 | ABCA1               | 3209.94                          | 1.47                    | 6.96E-10            |
| ENSG00000254870 | ATP6V1G2-<br>DDX39B | 227.76                           | 1.46                    | 8.12E-14            |
| ENSG00000141068 | KSR1                | 690.79                           | 1.46                    | 5.01E-29            |
| ENSG00000072134 | EPN2                | 271.56                           | 1.44                    | 1.34E-18            |
| ENSG00000101190 | TCFL5               | 715.48                           | 1.44                    | 1.75E-14            |
| ENSG00000215912 | TTC34               | 440.05                           | 1.44                    | 3.82E-19            |
| ENSG00000118513 | MYB                 | 290.40                           | 1.42                    | 5.37E-05            |
| ENSG00000121966 | CXCR4               | 82583.46                         | 1.40                    | 3.26E-06            |
| ENSG00000150672 | DLG2                | 570.30                           | 1.40                    | 3.76E-09            |
| ENSG00000099953 | MMP11               | 421.29                           | 1.40                    | 7.99E-18            |
| ENSG00000166348 | USP54               | 347.07                           | 1.39                    | 4.46E-26            |
| ENSG00000129226 | CD68                | 953.26                           | -3.76                   | 2.05E-125           |
| ENSG00000197629 | MPEG1               | 2503.31                          | -3.12                   | 1.13E-35            |
| ENSG00000116701 | NCF2                | 1227.26                          | -2.90                   | 4.51E-53            |
| ENSG00000124772 | CPNE5               | 2444.89                          | -2.57                   | 1.17E-21            |
| ENSG00000186818 | LILRB4              | 949.50                           | -2.56                   | 2.30E-22            |
| ENSG00000277632 | CCL3                | 316.78                           | -2.54                   | 7.13E-16            |

|                 |            |         |       |          |
|-----------------|------------|---------|-------|----------|
| ENSG00000140678 | ITGAX      | 7274.70 | -2.48 | 4.60E-28 |
| ENSG00000203896 | LIME1      | 225.21  | -2.43 | 6.65E-47 |
| ENSG00000278195 | SSTR3      | 255.24  | -2.29 | 2.25E-23 |
| ENSG00000173366 | AC097637.1 | 240.20  | -2.25 | 7.01E-15 |
| ENSG00000177685 | CRACR2B    | 1095.87 | -2.23 | 5.75E-37 |
| ENSG00000011028 | MRC2       | 200.59  | -2.18 | 1.07E-18 |
| ENSG00000186810 | CXCR3      | 307.94  | -2.18 | 2.69E-16 |
| ENSG00000126860 | EVI2A      | 579.76  | -2.11 | 2.71E-39 |
| ENSG00000169413 | RNASE6     | 813.61  | -2.08 | 2.40E-19 |
| ENSG00000188389 | PDCD1      | 361.91  | -2.02 | 1.42E-55 |
| ENSG00000167711 | SERPINF2   | 275.58  | -2.01 | 2.32E-28 |
| ENSG00000138623 | SEMA7A     | 724.22  | -1.98 | 2.46E-34 |
| ENSG00000133067 | LGR6       | 228.25  | -1.98 | 7.69E-24 |
| ENSG00000030582 | GRN        | 6864.43 | -1.97 | 6.96E-60 |
| ENSG00000179841 | AKAP5      | 255.83  | -1.96 | 3.41E-17 |
| ENSG00000116771 | AGMAT      | 230.14  | -1.96 | 1.40E-33 |
| ENSG00000261150 | EPPK1      | 281.68  | -1.95 | 8.57E-14 |
| ENSG00000146386 | ABRA1      | 290.48  | -1.95 | 1.78E-24 |
| ENSG00000216490 | IFI30      | 1022.84 | -1.92 | 3.86E-14 |
| ENSG00000115956 | PLEK       | 2534.33 | -1.91 | 1.46E-15 |
| ENSG00000196154 | S100A4     | 3060.76 | -1.91 | 6.17E-42 |
| ENSG00000189159 | JPT1       | 358.79  | -1.90 | 1.57E-22 |
| ENSG00000157388 | CACNA1D    | 574.72  | -1.87 | 4.32E-10 |
| ENSG00000172824 | CES4A      | 426.87  | -1.87 | 1.12E-16 |

\*30 most up-regulated genes (positive fold change) and down-regulated genes (negative fold change) in CXCR4<sup>bright</sup>CD5<sup>dim</sup> subpopulation.

**Supplemental Table 3: List of migration-related genes which were identified as differentially expressed in CXCR4/CD5 subpopulations**

| Gene ID         | Gene name | Base Mean<br>(reads per million) | Fold Change<br>(log <sub>2</sub> ) * | adjusted<br>P-value |
|-----------------|-----------|----------------------------------|--------------------------------------|---------------------|
| ENSG00000114353 | GNAI2     | 8685                             | -0.95                                | 4.08E-75            |
| ENSG00000100823 | APEX1     | 3708                             | -1.05                                | 2.8E-59             |
| ENSG00000030582 | GRN       | 6864                             | -1.97                                | 7.4E-57             |
| ENSG00000128340 | RAC2      | 9335                             | -1.75                                | 2.46E-53            |
| ENSG00000182054 | IDH2      | 1225                             | -1.23                                | 1.14E-50            |
| ENSG00000108518 | PFN1      | 8083                             | -0.96                                | 1.63E-47            |
| ENSG00000100292 | HMOX1     | 1000                             | -1.76                                | 2.45E-43            |
| ENSG00000159842 | ABR       | 11899                            | 1.05                                 | 1.36E-42            |
| ENSG00000205542 | TMSB4X    | 27296                            | -1.33                                | 3.42E-41            |
| ENSG00000103490 | PYCARD    | 302                              | -1.53                                | 1.59E-39            |
| ENSG00000197043 | ANXA6     | 6852                             | -1.34                                | 8.87E-39            |
| ENSG00000172725 | CORO1B    | 2034                             | -0.75                                | 7.85E-38            |
| ENSG00000149781 | FERMT3    | 2224                             | -1.24                                | 3.7E-36             |
| ENSG00000176973 | FAM89B    | 519                              | -1.23                                | 7.76E-36            |
| ENSG00000108561 | C1QBP     | 984                              | -1.00                                | 2.72E-35            |
| ENSG00000002586 | CD99      | 2088                             | -1.11                                | 5.98E-35            |
| ENSG00000131375 | CAPN7     | 2115                             | 0.92                                 | 5.99E-33            |
| ENSG00000149925 | ALDOA     | 7757                             | -0.64                                | 1.32E-32            |
| ENSG00000138623 | SEMA7A    | 724                              | -1.98                                | 2.66E-32            |
| ENSG00000100092 | SH3BP1    | 1891                             | -0.96                                | 7.89E-32            |
| ENSG00000121879 | PIK3CA    | 3805                             | 0.75                                 | 5.77E-31            |
| ENSG00000134242 | PTPN22    | 5538                             | -0.84                                | 1.36E-30            |
| ENSG00000139626 | ITGB7     | 6295                             | -1.74                                | 1.79E-30            |
| ENSG00000105429 | MEGF8     | 1215                             | 0.80                                 | 1.85E-30            |
| ENSG00000149177 | PTPRJ     | 8064                             | -0.83                                | 6.66E-30            |
| ENSG00000196712 | NF1       | 2136                             | .1.13                                | 5.83E-28            |
| ENSG00000019995 | ZRANB1    | 2053                             | 0.69                                 | 6.03E-28            |
| ENSG00000064666 | CNN2      | 5355                             | -1.32                                | 2.19E-27            |
| ENSG00000142798 | HSPG2     | 725                              | -1.51                                | 6.47E-27            |
| ENSG00000140678 | ITGAX     | 7275                             | -2.48                                | 2.76E-26            |
| ENSG00000023902 | PLEKHO1   | 3666                             | -0.87                                | 2.88E-26            |
| ENSG00000177169 | ULK1      | 2386                             | 0.62                                 | 4.53E-26            |
| ENSG00000136167 | LCP1      | 12293                            | -1.04                                | 1.06E-25            |
| ENSG00000108854 | SMURF2    | 1459                             | 0.69                                 | 2.23E-25            |
| ENSG00000144711 | IQSEC1    | 2265                             | -0.91                                | 4.25E-25            |
| ENSG00000172757 | CFL1      | 9706                             | -0.61                                | 9.42E-25            |
| ENSG00000143322 | ABL2      | 2082                             | 0.93                                 | 2.11E-24            |
| ENSG00000164190 | NIPBL     | 8141                             | 0.61                                 | 4.29E-24            |
| ENSG00000111348 | ARHGDIB   | 9596                             | -0.75                                | 1.85E-23            |
| ENSG00000163466 | ARPC2     | 10620                            | -0.81                                | 2.38E-23            |
| ENSG00000132386 | SERPINF1  | 2035                             | -1.47                                | 3.17E-23            |
| ENSG00000157764 | BRAF      | 3089                             | 0.63                                 | 8.28E-23            |
| ENSG00000134318 | ROCK2     | 1826                             | 0.60                                 | 1.91E-22            |
| ENSG00000155366 | RHOC      | 1754                             | -1.33                                | 1.98E-22            |
| ENSG00000133067 | LGR6      | 228                              | -1.98                                | 2.87E-22            |
| ENSG00000197471 | SPN       | 1125                             | -1.27                                | 1.59E-21            |
| ENSG00000103769 | RAB11A    | 1740                             | -0.95                                | 1.78E-21            |
| ENSG00000184481 | FOXO4     | 969                              | 0.70                                 | 2.34E-21            |
| ENSG00000139146 | SINHCAF   | 4318                             | 0.92                                 | 2.49E-21            |
| ENSG00000139725 | RHOF      | 893                              | -0.92                                | 4.00E-21            |

|                        |             |             |             |                 |
|------------------------|-------------|-------------|-------------|-----------------|
| ENSG00000162704        | ARPC5       | 2307        | -1.17       | 7.62E-21        |
| ENSG00000123338        | NCKAP1L     | 12107       | -0.74       | 9.13E-21        |
| ENSG00000160007        | ARHGAP35    | 1749        | 0.96        | 1.04E-20        |
| ENSG00000122694        | GLIPR2      | 363         | -1.59       | 1.93E-19        |
| ENSG00000134954        | ETS1        | 21200       | 1.00        | 1.97E-19        |
| ENSG00000131504        | DIAPH1      | 5515        | -0.60       | 4.96E-19        |
| ENSG00000100300        | TSPO        | 986         | -0.89       | 4.48E-18        |
| ENSG00000136286        | MYO1G       | 3398        | -1.44       | 7.97E-18        |
| ENSG00000065534        | MYLK        | 2140        | .1.91       | 8.31E-18        |
| ENSG00000110934        | BIN2        | 3042        | -1.04       | 8.99E-18        |
| ENSG00000185950        | IRS2        | 2382        | 1.12        | 1.19E-17        |
| ENSG00000102879        | CORO1A      | 13492       | -0.65       | 1.38E-17        |
| ENSG00000083642        | PDS5B       | 2239        | 0.70        | 2.36E-17        |
| ENSG00000213654        | GPSM3       | 2977        | -0.63       | 2.51E-17        |
| ENSG00000188906        | LRRK2       | 5584        | -0.64       | 1.35E-16        |
| ENSG00000109919        | MTCH2       | 672         | -0.96       | 1.97E-16        |
| <b>ENSG00000109458</b> | <b>GAB1</b> | <b>6770</b> | <b>0.82</b> | <b>2.44E-16</b> |
| ENSG00000177697        | CD151       | 339         | -1.78       | 2.55E-16        |
| ENSG00000140443        | IGF1R       | 344         | 1.42        | 3.55E-16        |
| ENSG00000079385        | CEACAM1     | 1015        | -1.15       | 5.01E-16        |
| ENSG00000173531        | MST1        | 346         | -1.15       | 7.41E-16        |
| ENSG00000168961        | LGALS9      | 4699        | -0.75       | 1.28E-15        |
| ENSG00000196924        | FLNA        | 29974       | -1.15       | 1.33E-15        |
| ENSG00000109756        | RAPGEF2     | 6076        | 0.65        | 1.46E-15        |
| ENSG00000151651        | ADAM8       | 1768        | -1.25       | 1.46E-15        |
| ENSG00000108819        | PPP1R9B     | 5964        | -0.89       | 1.64E-15        |
| ENSG00000160255        | ITGB2       | 480         | -1.34       | 3.23E-15        |
| ENSG00000166974        | MAPRE2      | 1919        | -0.66       | 3.96E-15        |
| ENSG00000186810        | CXCR3       | 308         | -2.18       | 4.32E-15        |
| ENSG00000026025        | VIM         | 17798       | -0.88       | 5.35E-15        |
| ENSG00000277632        | CCL3        | 317         | -2.54       | 1.09E-14        |
| ENSG00000115310        | RTN4        | 1720        | -0.63       | 1.5E-14         |
| ENSG00000087589        | CASS4       | 391         | -1.16       | 1.87E-14        |
| ENSG00000143669        | LYST        | 9027        | 1.15        | 2.23E-14        |
| ENSG00000213066        | FGFR1OP     | 873         | 0.63        | 4.07E-14        |
| ENSG00000166949        | SMAD3       | 290         | 1.81        | 4.59E-14        |
| ENSG00000163832        | ELP6        | 294         | -0.65       | 5.63E-14        |
| ENSG00000146535        | GNA12       | 4735        | 0.98        | 8.25E-14        |
| ENSG00000150093        | ITGB1       | 8907        | -0.69       | 8.38E-14        |
| ENSG00000136950        | ARPC5L      | 1205        | -0.78       | 8.98E-14        |
| ENSG00000035664        | DAPK2       | 292         | -1.31       | 9.39E-14        |
| ENSG00000118689        | FOXO3       | 1987        | 1.06        | 1.26E-13        |
| ENSG00000039523        | RIPOR1      | 9249        | 0.84        | 1.46E-13        |
| ENSG00000137509        | PRCP        | 1533        | -0.61       | 1.56E-13        |
| ENSG00000131236        | CAP1        | 5959        | -0.74       | 5.82E-13        |
| ENSG00000174483        | BBS1        | 532         | 0.84        | 9.33E-13        |
| ENSG00000261150        | EPPK1       | 282         | -1.95       | 1.00E-12        |
| ENSG00000108840        | HDAC5       | 2714        | 0.65        | 1.29E-12        |
| ENSG00000169508        | GPR183      | 1004        | -1.79       | 2.1E-12         |
| ENSG00000177105        | RHOG        | 886         | -0.81       | 2.31E-12        |
| ENSG00000142347        | MYO1F       | 1331        | -0.61       | 7.07E-12        |
| ENSG00000071051        | NCK2        | 2153        | 1.09        | 1.1E-11         |
| ENSG00000079337        | RAPGEF3     | 7587        | 0.82        | 2.54E-11        |
| ENSG00000150347        | ARID5B      | 6961        | 0.60        | 3.47E-11        |
| ENSG00000100219        | XBP1        | 2708        | 0.91        | 4.1E-11         |
| ENSG00000104998        | IL27RA      | 774         | -0.99       | 5.8E-11         |



|                 |         |       |       |          |
|-----------------|---------|-------|-------|----------|
| ENSG00000174175 | SELP    | 566   | 1.10  | 5.86E-11 |
| ENSG00000134352 | IL6ST   | 2266  | 0.80  | 1.77E-10 |
| ENSG00000123358 | NR4A1   | 578   | 1.23  | 3.3E-10  |
| ENSG00000115109 | EPB41L5 | 254   | 1.04  | 6.93E-10 |
| ENSG00000149418 | ST14    | 3406  | -0.72 | 1.02E-09 |
| ENSG00000196220 | SRGAP3  | 520   | -0.83 | 1.66E-09 |
| ENSG00000140564 | FURIN   | 1265  | 0.66  | 1.93E-09 |
| ENSG00000127603 | MACF1   | 7205  | -0.65 | 5.98E-09 |
| ENSG00000135622 | SEMA4F  | 544   | 0.62  | 6.28E-09 |
| ENSG00000275342 | PRAG1   | 1966  | -0.65 | 9.72E-09 |
| ENSG00000107104 | KANK1   | 730   | 0.61  | 9.96E-09 |
| ENSG00000112139 | MDGA1   | 2082  | 1.06  | 1.71E-08 |
| ENSG00000152127 | MGAT5   | 6438  | 0.63  | 3.27E-08 |
| ENSG00000004399 | PLXND1  | 2216  | 0.95  | 3.51E-08 |
| ENSG00000144791 | LIMD1   | 6186  | -0.78 | 4.12E-08 |
| ENSG00000166313 | APBB1   | 1070  | 0.63  | 4.25E-08 |
| ENSG00000102760 | RGCC    | 1179  | -0.93 | 7.29E-08 |
| ENSG00000089159 | PXN     | 1592  | -0.64 | 9.01E-08 |
| ENSG00000157193 | LRP8    | 412   | -0.67 | 1.01E-07 |
| ENSG00000163697 | APBB2   | 2695  | 0.89  | 1.09E-07 |
| ENSG00000135503 | ACVR1B  | 392   | 0.89  | 1.66E-07 |
| ENSG00000163932 | PRKCD   | 1513  | -0.87 | 1.97E-07 |
| ENSG00000079691 | CARMIL1 | 1689  | 0.60  | 2.09E-07 |
| ENSG00000068024 | HDAC4   | 237   | 0.88  | 2.54E-07 |
| ENSG00000130669 | PAK4    | 208   | 0.82  | 1.01E-06 |
| ENSG00000261371 | PECAM1  | 4511  | -0.78 | 1.9E-06  |
| ENSG00000169896 | ITGAM   | 1899  | -1.30 | 1.91E-06 |
| ENSG00000121966 | CXCR4   | 82583 | 1.40  | 3.26E-06 |
| ENSG00000107738 | VSIR    | 416   | -0.77 | 6.09E-06 |
| ENSG00000117020 | AKT3    | 1058  | 0.83  | 7.23E-06 |
| ENSG00000160683 | CXCR5   | 5662  | -0.61 | 8.47E-06 |
| ENSG00000143537 | ADAM15  | 362   | -0.67 | 1.45E-05 |
| ENSG00000197381 | ADARB1  | 2338  | 1.10  | 2.34E-05 |
| ENSG00000158321 | AUTS2   | 492   | 0.74  | 3.89E-05 |
| ENSG00000160789 | LMNA    | 334   | -1.18 | 5.73E-05 |
| ENSG00000198648 | STK39   | 201   | -0.68 | 6.67E-05 |
| ENSG00000069702 | TGFBR3  | 1979  | -0.61 | 7.03E-05 |
| ENSG00000182957 | SPATA13 | 874   | -0.62 | 0.000104 |
| ENSG00000171522 | PTGER4  | 847   | -1.06 | 0.000138 |
| ENSG00000067141 | NEO1    | 305   | 0.62  | 0.000356 |
| ENSG00000085733 | CTTN    | 295   | 0.76  | 0.000739 |

\* positive numbers mean a relative upregulation in CXCR4<sup>bright</sup>CD5<sup>dim</sup> subpopulation

**Supplemental Table 4: GO term analysis of differentially expressed genes in CXCR4/CD5 subpopulations**

| GO Term*   | Description                                            | P-value  | FDR q-value | Enrichment | B   | b   |
|------------|--------------------------------------------------------|----------|-------------|------------|-----|-----|
| GO:0110053 | regulation of actin filament organization              | 6.39E-12 | 7.89E-9     | 2.72       | 228 | 54  |
| GO:0032956 | regulation of actin cytoskeleton organization          | 8.98E-12 | 1.02E-8     | 2.48       | 292 | 63  |
| GO:0032970 | regulation of actin filament-based process             | 6.71E-11 | 4.52E-8     | 2.33       | 320 | 65  |
| GO:0030832 | regulation of actin filament length                    | 9.03E-11 | 5.57E-8     | 3.00       | 157 | 41  |
| GO:0008064 | regulation of actin polymerization or depolymerization | 2.79E-10 | 1.59E-7     | 2.94       | 156 | 40  |
| GO:0007015 | actin filament organization                            | 3.46E-9  | 1.55E-6     | 2.46       | 224 | 48  |
| GO:0030833 | regulation of actin filament polymerization            | 1.62E-8  | 5.84E-6     | 2.79       | 144 | 35  |
| GO:0030029 | actin filament-based process                           | 1.52E-7  | 4.68E-5     | 2.00       | 345 | 60  |
| GO:0030036 | actin cytoskeleton organization                        | 1.95E-7  | 5.9E-5      | 2.10       | 284 | 52  |
| GO:0030838 | positive regulation of actin filament polymerization   | 1.63E-6  | 3.71E-4     | 2.19       | 71  | 20  |
| GO:0032233 | positive regulation of actin filament bundle assembly  | 3.86E-5  | 3.86E-3     | 2.91       | 54  | 15  |
| GO:0034314 | Arp2/3 complex-mediated actin nucleation               | 7.41E-5  | 6.42E-3     | 1.73       | 14  | 7   |
| GO:0008154 | actin polymerization or depolymerization               | 1.01E-4  | 8.13E-3     | 2.83       | 52  | 14  |
| GO:0045010 | actin nucleation                                       | 3.41E-4  | 2.02E-2     | 1.97       | 22  | 8   |
| GO:0030834 | regulation of actin filament depolymerization          | 4.3E-4   | 2.44E-2     | 2.93       | 46  | 12  |
| GO:0032231 | regulation of actin filament bundle assembly           | 7.97E-4  | 4.13E-2     | 1.29       | 84  | 17  |
| GO:0040012 | regulation of locomotion                               | 1.35E-5  | 1.8E-3      | 3.44       | 813 | 106 |
| GO:0040017 | positive regulation of locomotion                      | 1.21E-4  | 9.35E-3     | 1.92       | 461 | 64  |
| GO:0040011 | locomotion                                             | 1.65E-4  | 1.14E-2     | 1.73       | 835 | 103 |
| GO:2000145 | regulation of cell motility                            | 3.78E-6  | 6.75E-4     | 1.62       | 753 | 102 |
| GO:2000147 | positive regulation of cell motility                   | 4.5E-5   | 4.38E-3     | 2.11       | 437 | 63  |
| GO:0048870 | cell motility                                          | 3.31E-4  | 1.98E-2     | 1.25       | 763 | 94  |
| GO:0030334 | regulation of cell migration                           | 3.58E-6  | 6.63E-4     | 2.76       | 706 | 97  |
| GO:0030335 | positive regulation of cell migration                  | 2.91E-5  | 3.19E-3     | 2.11       | 422 | 62  |
| GO:1903039 | positive regulation of leukocyte cell-cell adhesion    | 1.77E-6  | 3.98E-4     | 1.77       | 210 | 40  |
| GO:0030155 | regulation of cell adhesion                            | 4.11E-6  | 7.25E-4     | 3.42       | 608 | 86  |
| GO:0045785 | positive regulation of cell adhesion                   | 1.1E-5   | 1.53E-3     | 4.51       | 366 | 57  |
| GO:0022409 | positive regulation of cell-cell adhesion              | 1.27E-5  | 1.72E-3     | 3.04       | 243 | 42  |
| GO:1903037 | regulation of leukocyte cell-cell adhesion             | 7.02E-5  | 6.19E-3     | 5.74       | 286 | 45  |
| GO:0022407 | regulation of cell-cell adhesion                       | 2.55E-4  | 1.63E-2     | 2.11       | 373 | 53  |

|                                                                                                                                                                                                                                                                                                                                                                                                              |                                                  |          |         |      |     |    |
|--------------------------------------------------------------------------------------------------------------------------------------------------------------------------------------------------------------------------------------------------------------------------------------------------------------------------------------------------------------------------------------------------------------|--------------------------------------------------|----------|---------|------|-----|----|
| GO:0032956                                                                                                                                                                                                                                                                                                                                                                                                   | regulation of actin cytoskeleton organization    | 8.98E-12 | 1.02E-8 | 2.48 | 292 | 63 |
| GO:0030036                                                                                                                                                                                                                                                                                                                                                                                                   | actin cytoskeleton organization                  | 1.95E-7  | 5.9E-5  | 2.10 | 284 | 52 |
| GO:0051493                                                                                                                                                                                                                                                                                                                                                                                                   | regulation of cytoskeleton organization          | 5.68E-7  | 1.5E-4  | 1.80 | 467 | 73 |
| GO:0051495                                                                                                                                                                                                                                                                                                                                                                                                   | positive regulation of cytoskeleton organization | 1.55E-6  | 3.63E-4 | 3.13 | 179 | 36 |
| GO:0007010                                                                                                                                                                                                                                                                                                                                                                                                   | cytoskeleton organization                        | 1.7E-4   | 1.17E-2 | 1.31 | 739 | 93 |
| GO:0110053                                                                                                                                                                                                                                                                                                                                                                                                   | regulation of actin filament organization        | 6.39E-12 | 7.89E-9 | 2.72 | 228 | 54 |
| <p>*GO Term analysis was performed by GOrilla online tool and showed GO Terms are referring to group „Processes“.</p> <p>Enrichment = <math>(b/n) / (B/N)</math><br/> N - is the total number of genes<br/> B - is the total number of genes associated with a specific GO term<br/> n - is the number of genes in the top of the user's input genes<br/> b - is the number of genes in the intersection</p> |                                                  |          |         |      |     |    |

**Supplemental Table 5: Statistical analysis of all measurements for cell motility assay**

| <i>Parameter</i>                                                              | <b>MEC1<sup>wt</sup> cells<br/>(mean ± s.e.m.)</b> | <b>MEC1<sup>GAB1-KO</sup> cells<br/>(mean ± s.e.m.)</b> | <b>ANOVA<br/>P-value</b> |
|-------------------------------------------------------------------------------|----------------------------------------------------|---------------------------------------------------------|--------------------------|
| <i>Circularity*</i>                                                           | 0.652 ± 0.004                                      | 0.653 ± 0.004                                           | n.s.                     |
| <i>Elongation*</i>                                                            | 0.323 ± 0.008                                      | 0.332 ± 0.008                                           | n.s.                     |
| <i>Mass [pg]*</i>                                                             | 200.6 ± 5.3                                        | 198.7 ± 4.8                                             | n.s.                     |
| <i>Spreading [µm<sup>2</sup>/pg]*</i>                                         | 1.75 ± 0.02                                        | 1.57 ± 0.02                                             | n.s.                     |
| <i>Displacement [µm/60 s]*</i>                                                | 3.75 ± 0.14                                        | 2.71 ± 0.10                                             | 0.035                    |
| <i>Persistence*</i>                                                           | 0.69 ± 0.01                                        | 0.60 ± 0.01                                             | 0.036                    |
| Number of movies                                                              | 6                                                  | 6                                                       |                          |
| Number of tracked cells                                                       | 195                                                | 186                                                     |                          |
| Number of time point measurements                                             | 11 939                                             | 15 184                                                  |                          |
| s.e.m. stands for standard error of the mean                                  |                                                    |                                                         |                          |
| * For the description of the categories see <i>Supplemental Methods</i> above |                                                    |                                                         |                          |

**Supplemental Table 6: Transcription factors differentially expressed in CXCR4/CD5 subpopulations**

| Gene ID                                                                                                     | Gene name    | Base Mean<br>(reads per million) | Fold Change<br>(log2) * | adjusted P-value |
|-------------------------------------------------------------------------------------------------------------|--------------|----------------------------------|-------------------------|------------------|
| ENSG00000112182                                                                                             | BACH2        | 10948                            | 2.05                    | 2.99E-44         |
| ENSG00000166949                                                                                             | SMAD3        | 290                              | 1.81                    | 4.59E-14         |
| ENSG00000186350                                                                                             | RXRA         | 2740                             | 1.72                    | 1.55E-11         |
| ENSG00000101190                                                                                             | TCFL5        | 715                              | 1.44                    | 1.75E-14         |
| ENSG00000118513                                                                                             | MYB          | 290                              | 1.42                    | 5.37E-05         |
| <b>ENSG00000150907</b>                                                                                      | <b>FOXO1</b> | <b>3615</b>                      | <b>1.30</b>             | <b>7.29E-21</b>  |
| ENSG00000123358                                                                                             | NR4A1        | 578                              | 1.23                    | 3.30E-10         |
| ENSG00000177683                                                                                             | THAP5        | 919                              | 1.08                    | 3.70E-22         |
| ENSG00000118689                                                                                             | FOXO3        | 1987                             | 1.06                    | 1.26E-13         |
| ENSG00000182568                                                                                             | SATB1        | 1161                             | 1.05                    | 4.81E-20         |
| ENSG00000160961                                                                                             | ZNF333       | 1259                             | 1.04                    | 5.76E-20         |
| ENSG00000106624                                                                                             | AEBP1        | 4585                             | 1.03                    | 4.06E-06         |
| ENSG00000197647                                                                                             | ZNF433       | 497                              | 1.02                    | 1.89E-14         |
| ENSG00000074657                                                                                             | ZNF532       | 1534                             | 1.00                    | 3.05E-05         |
| ENSG00000102870                                                                                             | ZNF629       | 365                              | 1.00                    | 9.21E-15         |
| ENSG00000134954                                                                                             | ETS1         | 21200                            | 1.00                    | 1.97E-19         |
| ENSG00000137309                                                                                             | HMG1A1       | 1173                             | -1.05                   | 2.13E-26         |
| ENSG00000198715                                                                                             | GLMP         | 432                              | -1.20                   | 2.04E-18         |
| ENSG00000198176                                                                                             | TFDP1        | 1457                             | -1.26                   | 2.90E-21         |
| ENSG00000011590                                                                                             | ZBTB32       | 2944                             | -1.48                   | 3.1715E-24       |
| * positive numbers mean a relative upregulation in CXCR4 <sup>bright</sup> CD5 <sup>dim</sup> subpopulation |              |                                  |                         |                  |

**Supplemental Table 7: Numbers of predicted transcriptional binding sites in promotor region of *GAB1* gene for transcription factors differentially expressed in CXCR4/CD5 subpopulations**

| Gene ID                              | Gene name    | Number of predicted TBS* |
|--------------------------------------|--------------|--------------------------|
| ENSG00000112182                      | BACH2        | 1                        |
| ENSG00000166949                      | SMAD3        | 6                        |
| ENSG00000186350                      | RXRA         | 15                       |
| ENSG00000101190                      | TCFL5        | 25                       |
| ENSG00000118513                      | MYB          | 15                       |
| <b>ENSG00000150907</b>               | <b>FOXO1</b> | <b>11</b>                |
| ENSG00000123358                      | NR4A1        | 5                        |
| ENSG00000177683                      | THAP5        | Not in database          |
| ENSG00000118689                      | FOXO3        | 7                        |
| ENSG00000182568                      | SATB1        | 25                       |
| ENSG00000160961                      | ZNF333       | 4                        |
| ENSG00000106624                      | AEBP1        | Not in database          |
| ENSG00000197647                      | ZNF433       | Not in database          |
| ENSG00000074657                      | ZNF532       | Not in database          |
| ENSG00000102870                      | ZNF629       | Not in database          |
| ENSG00000134954                      | ETS1         | 58                       |
| ENSG00000137309                      | HMGA1        | 5                        |
| ENSG00000198715                      | GLMP         | Not in database          |
| ENSG00000198176                      | TFDP1        | 0                        |
| ENSG00000011590                      | ZBTB32       | Not in database          |
| *performed with ContraV3 online tool |              |                          |

**Supplemental Table 8: Table of predicted FoxO1 binding sites in the upstream region of *GAB1* gene**

| Transcription binding site (TBS) number                                                                                | Approximate position (hg19 version) | ChIP results for FoxO1-enrichment in the region upstream of <i>GAB1</i> |
|------------------------------------------------------------------------------------------------------------------------|-------------------------------------|-------------------------------------------------------------------------|
| 1                                                                                                                      | chr4:144256738                      | No enrichment                                                           |
| 2                                                                                                                      | chr4:144256758                      | No enrichment                                                           |
| 3                                                                                                                      | chr4:144256434                      | Not investigated                                                        |
| 4                                                                                                                      | chr4:144256269                      | Enrichment (Fig. 3B)                                                    |
| 5                                                                                                                      | chr4:144256326                      | Enrichment (Fig. 3B)                                                    |
| 6                                                                                                                      | chr4:144255992                      | No enrichment                                                           |
| 7                                                                                                                      | chr4:144255229                      | Not investigated                                                        |
| 8                                                                                                                      | chr4:144254941                      | Not investigated                                                        |
| 9                                                                                                                      | chr4:144254638                      | Not investigated                                                        |
| 10                                                                                                                     | chr4:144254529                      | Enrichment (Fig. 3B)                                                    |
| 11                                                                                                                     | chr4:144254457                      | Not investigated                                                        |
| <p><b>Note:</b> TBS 1 + 2 and 4 + 5 were analyzed with the same primer sets due to close vicinity from each other.</p> |                                     |                                                                         |

## Supplemental References

1. Mraz M, Malinova K, Kotaskova J, et al. miR-34a, miR-29c and miR-17-5p are downregulated in CLL patients with TP53 abnormalities. *Leukemia*. 2009;23(6):1159-1163.
2. Mraz M, Malinova K, Mayer J, Pospisilova S. MicroRNA isolation and stability in stored RNA samples. *Biochem Biophys Res Commun*. 2009;390(1):1-4.
3. Pavlasova G, Borsky M, Svobodova V, et al. Rituximab primarily targets an intra-clonal BCR signaling proficient CLL subpopulation characterized by high CD20 levels. *Leukemia*. 2018;32(9):2028-2031.
4. Martin M. Cutadapt removes adapter sequences from high-throughput sequencing reads. *2011*. 2011;17(1):3 %J EMBnet.journal.
5. Hackenberg M, Sturm M, Langenberger D, Falcon-Perez JM, Aransay AM. miRanalyzer: a microRNA detection and analysis tool for next-generation sequencing experiments. *Nucleic Acids Res*. 2009;37(Web Server issue):W68-76.
6. Bolger AM, Lohse M, Usadel B. Trimmomatic: a flexible trimmer for Illumina sequence data. *Bioinformatics*. 2014;30(15):2114-2120.
7. Kozomara A, Griffiths-Jones S. miRBase: annotating high confidence microRNAs using deep sequencing data. *Nucleic Acids Res*. 2014;42(Database issue):D68-73.
8. Love MI, Huber W, Anders S. Moderated estimation of fold change and dispersion for RNA-seq data with DESeq2. *Genome Biol*. 2014;15(12):550.
9. Robinson MD, McCarthy DJ, Smyth GK. edgeR: a Bioconductor package for differential expression analysis of digital gene expression data. *Bioinformatics*. 2010;26(1):139-140.
10. Huber W, Carey VJ, Gentleman R, et al. Orchestrating high-throughput genomic analysis with Bioconductor. *Nat Methods*. 2015;12(2):115-121.
11. Babicki S, Arndt D, Marcu A, et al. Heatmapper: web-enabled heat mapping for all. *Nucleic Acids Res*. 2016;44(W1):W147-153.
12. Yart A, Laffargue M, Mayeux P, et al. A critical role for phosphoinositide 3-kinase upstream of Gab1 and SHP2 in the activation of ras and mitogen-activated protein kinases by epidermal growth factor. *J Biol Chem*. 2001;276(12):8856-8864.
13. Wiederschain D, Wee S, Chen L, et al. Single-vector inducible lentiviral RNAi system for oncology target validation. *Cell Cycle*. 2009;8(3):498-504.
14. Carey MF, Peterson CL, Smale ST. Chromatin immunoprecipitation (ChIP). *Cold Spring Harb Protoc*. 2009;2009(9):pdb prot5279.
15. Strbkova L, Zicha D, Vesely P, Chmelik R. Automated classification of cell morphology by coherence-controlled holographic microscopy. *J Biomed Opt*. 2017;22(8):1-9.
16. Zicha D, Genot E, Dunn GA, Kramer IM. TGFbeta1 induces a cell-cycle-dependent increase in motility of epithelial cells. *J Cell Sci*. 1999;112 ( Pt 4):447-454.
17. Dunn GA, Zicha D. Dynamics of fibroblast spreading. *J Cell Sci*. 1995;108 ( Pt 3):1239-1249.
18. Ritchie ME, Phipson B, Wu D, et al. limma powers differential expression analyses for RNA-sequencing and microarray studies. *Nucleic Acids Res*. 2015;43(7):e47.
19. Papatheodorou I, Moreno P, Manning J, et al. Expression Atlas update: from tissues to single cells. *Nucleic Acids Res*. 2020;48(D1):D77-D83.
20. Kreft L, Soete A, Hulpiau P, Botzki A, Saeys Y, De Bleser P. ConTra v3: a tool to identify transcription factor binding sites across species, update 2017. *Nucleic Acids Res*. 2017;45(W1):W490-W494.
21. Pyrzynska B, Dwojak M, Zerrouqi A, et al. FOXO1 promotes resistance of non-Hodgkin lymphomas to anti-CD20-based therapy. *Oncoimmunology*. 2018;7(5):e1423183.
